# Supplementary material for: Covalent inhibition of endoplasmic reticulum chaperone GRP78 disconnects the transduction of ER stress signals to inflammation and lipid accumulation in diet-induced obese mice
Source: eLife. 2022 Feb 9;11:e72182. doi: 10.7554/eLife.72182 (PMC8828050; doi:10.7554/eLife.72182)
Supplement: Figure 1—source data 2. [file elife-72182-fig1-data2.xlsx]

## Sheet: Figure 1E
	Control				HFD				HFD+celastrol (7.5mg/kg/d)
C16:1	24.744	23.929	24.925	30.777	39.74	48.113	51.798	46.423	21.78	22.292	25.08	22.401
C16:0	272.772	228.639	338.062	0	519.6	308.307	460.314	220.773	160.557	235.746	257.908	108.201
C18:3	21.44	21.932	21.581	23.906	25.411	27.646	29.639	24.971	21.631	22.42	22.642	23.098
C18:2	235.144	249.483	280.067	245.777	392.3	294.5	472.199	445.556	166.895	211.542	282.955	110.933
cis-C18:1	37.953	101.592	111.313	242.19	450.593	382.578	484.278	485.018	121.085	163.235	160.367	175.153
trans-C18:1	17.4	22.378	23.97	29.071	46.662	63.153	68.238	61.088	21.668	24.119	24.88	22.96
C18:0	151.626	139.736	154.195	77.733	103.95	108.749	132.925	132.489	101.626	158.104	129.042	143.455
C20:4	123.579	158.025	152.482	0	340.603	138.504	259.8	181.357	168.099	161.443	235.767	0
C20:5	28.014	27.881	25.306	17.603	29.526	28.835	28.911	12.651	15.507	15.621	22.446	16.134
cis-C20:3	21.528	24.632	20.942	28.746	50.401	77.176	77.036	69.348	19.596	22.038	23.109	22.391
cis-C20:2	17.728	18.458	18.722	20.028	23.929	29.103	29.844	28.625	17.858	19.31	18.9	19.477
cis-C20:1	20.277	20.79	20.972	22.422	33.253	41.665	34.371	16.471	20.585	19.938	20.882	20.867
C20:0	21.433	21.33	22.204	22.102	22.899	23.817	24.24	23.567	21.257	21.443	21.609	21.47
cis-C22:6	161.504	248.055	196.59	0	348.255	348.304	330.044	0	114.69	193.03	110.975	111.087
C22:0	53.264	54.668	55.642	55.385	53.56	53.603	53.779	54.437	53.841	54.313	53.285	54.465

## Sheet: Figure 1F
	Control				HFD				HFD+celastrol (7.5mg/kg/d)
C16:1	265.799	175.725	205.053	193.6	132.308	107.938	75.639	76.51	116.107	122.244	107.036	61.67
C16:0	514.811	528.633	556.027	550.731	479.949	492.565	528.817	520.484	596.943	463.205	461.781	471.824
C18:3	29.756	24.264	26.03	25.789	22.276	21.789	21.832	21.369	24.288	24.434	22.173	21.78
C18:2	524.016	591.104	576.491	588.082	473.795	488.715	512.151	539.397	533.864	563.671	481.145	536.795
cis-C18:1	367.937	421.125	147.053	390.082	448.184	445.362	446.717	453.323	454.812	423.633	425.108	250.448
trans-C18:1	161.196	78.643	103.933	96.944	181.939	158.253	97.43	100.615	172.793	235.898	159.166	95.373
C18:0	193.388	114.193	185.704	188.514	312.997	278.255	253.754	187.656	287.704	292.192	270.741	0
C20:4	90.469	46.643	51.448	52.54	61.907	48.227	51.106	48.509	59.066	53.332	45.839	14.263
C20:5	28.82	23.595	23.078		26.321	28.529	29.094	30.788	16.594	17.079	12.342	14.603
cis-C20:3	47.498	28.829	40.753	40.557	30.175	19.787	23.507	23.798	28.142	33.444	28.099	21.19
cis-C20:2	34.198	23.723	32.653	31.587	55.49	43.956	34.301	35.31	52.725	54.224	44.569	23.613
cis-C20:1	52.699	35.347	75.518	69.808	22.053	24.626	20.95	21.071	26.713	21.746	23.773	20.68
C20:0	25.898	23.335	30.653	29.138	25.863	24.462	23.224	23.477	25.974	25.044	24.097	22.594
cis-C22:6	235.321	26.414	132.581	156.665	41.22	34.54	33.204	31.343	44.236	44.791	32.946	33.517
C22:0	53.33	53.681	55.217	54.805	53.495	53.439	53.693	53.645	53.427	53.732	53.441	53.606
