# Supplementary material for: Covalent inhibition of endoplasmic reticulum chaperone GRP78 disconnects the transduction of ER stress signals to inflammation and lipid accumulation in diet-induced obese mice
Source: eLife. 2022 Feb 9;11:e72182. doi: 10.7554/eLife.72182 (PMC8828050; doi:10.7554/eLife.72182)
Supplement: Figure 2—source data 1. [file elife-72182-fig2-data1.xlsx]

## Sheet: Figure 2A
	Control			HFD			HFD+celastrol (7.5mg/kg/d)
PPAR-r	1	1	1	1.32869	1.16473	1.24833	0.450625	0.535887	0.392292
C/EBP-a	1	1	1	1.60214	1.58008	1.39474	0.876606	0.846745	0.632878
aP2	1	1	1	1.25701	1.44393	1.26576	0.417544	0.726986	0.678302
Resistin	1	1	1	1.59107	1.22264	1.29235	1.06437	0.829319	0.952638
Adipsin	1	1	1	1.21419	1.23114	1.6358	0.97942	0.737135	0.570382
CPT-1	1	1	1	0.61132	0.80107	0.432269	0.829319	1.00696	0.846745
CAT	1	1	1	0.586418	0.521233	0.570382	0.594603	1.10957	0.607097
UCP2	1	1	1	0.578344	0.482968	0.384219	0.757858	1.31951	0.986233

## Sheet: Figure 2B
	Control			HFD			HFD+celastrol (5mg/kg/d)			HFD+celastrol (7.5mg/kg/d)
PPAR-r	1	1	1	1.51572	1.91853	1.94531	1.18099	1.10957	1.07177	0.876606	0.806642	1.16473
C/EBP-a	1	1	1	1.75321	1.95884	2.05623	1.34723	1.30134	1.27456	1.49485	1.37554	1.28343
aP2	1	1	1	1.10957	1.23114	1.43396	0.438303	0.469761	0.371131	0.417544	0.406126	0.312083
Leptin	1	1	1	1.87055	2.2974	1.69349	0.48971	0.63728	0.543367	0.339151	0.482968	0.50698
Resistin	1	1	1	0.806642	1.43396	1.27456	0.339151	0.353553	0.752623	0.217638	0.222211	0.381565
Adipsin	1	1	1	1.27456	1.28343	1.34723	0.632878	0.562529	0.590496	0.386891	0.784584	0.389582
CPT-1	1	1	1	0.882703	0.646176	0.858565	1.23114	1.27456	1.46409	1.64718	1.70527	1.79005
CAT	1	1	1	0.721965	0.97942	0.933033	1.17284	1.31951	1.24833	1.79005	1.89211	1.72907
ACO	1	1	1	1.24833	1.05702	0.933033	1.67018	2.01391	1.82766	1.93187	2.44528	2.17347
UCP2	1	1	1	0.420448	0.784584	0.752623	0.747425	0.876606	1.36604	1.42405	1.40444	1.14076

## Sheet: Figure 2C
	Control			HFD			HFD+celastrol (7.5mg/kg/d)
PPAR-r	1	1	1	1.31951	1.58008	2.02792	0.524858	0.539614	0.602904
C/EBP-a	1	1	1	1.97246	1.21419	2.12874	1.04247	1.10957	0.882703
aP2	1	1	1	1.87905	2.05623	1.30134	1.11729	0.50698	0.432269
Leptin	1	1	1	2.36198	1.48452	1.79005	0.726986	0.517633	1.1487
Resistin	1	1	1	1.70527	1.31039	1.32869	0.876606	0.582367	0.946058
Adipsin	1	1	1	1.76541	2.2974	1.28343	1.11729	1.00696	0.895025
CPT-1	1	1	1	0.619854	0.846745	0.876606	0.80107	0.939523	1.12506
CAT	1	1	1	0.747425	0.707107	1.11729	1.13288	0.870551	1.52626
ACO	1	1	1	0.673617	0.823591	0.76313	1.20581	0.97942	0.812252
UCP2	1	1	1	1.39474	1.10957	1.03527	1.08674	1.10957	0.933033
