# Supplementary material for: Covalent inhibition of endoplasmic reticulum chaperone GRP78 disconnects the transduction of ER stress signals to inflammation and lipid accumulation in diet-induced obese mice
Source: eLife. 2022 Feb 9;11:e72182. doi: 10.7554/eLife.72182 (PMC8828050; doi:10.7554/eLife.72182)
Supplement: Figure 5—source data 2. [file elife-72182-fig5-data2.xlsx]

## Sheet: Sheet1
	Ctrl			Palmitate 400uM			Pal+celastrol 0.25uM			Pal+celastrol 0.5uM			Pal+celastrol 0.75uM			Pal+celastrol 1uM
GRP78	0.926102	0.897221	1.09767	1.55424	1.44598	1.5001	1.16824	1.14067	1.4154	1.12452	1.06644	1.36645	1.02091	0.97823	1.17953	0.903549	0.843588	1.04839
IRE1a	0.906599	1.00535	1.08805	1.32083	1.33027	1.46275	1.03699	1.15167	1.21964	0.754689	0.848936	0.860041	0.708807	0.780241	0.775099	0.429142	0.499543	0.495244
XBP1	0.86438	1.13154	1.00408	1.33301	1.25731	1.47074	1.02321	1.3057	1.20875	0.946795	1.22688	1.1233	0.852268	1.08428	1.00708	0.587775	0.773615	0.687629
ATF6	0.886812	0.971997	1.14119	1.15758	1.20244	1.30825	0.992501	1.03444	1.11522	0.596242	0.602872	0.761782	0.39092	0.417246	0.55455	0.268521	0.278401	0.403643
p-eIF/eIF	1.06103	1.01027	0.928692	1.26941	1.23655	1.13494	1.22743	1.17719	1.07036	1.23129	1.15613	1.05425	0.913262	0.813123	0.722322	0.529709	0.485635	0.436492
CHOP	1.06091	1.01252	0.926574	1.64185	1.62985	1.50113	1.57682	1.44796	1.56658	1.28	1.25569	1.15331	1.10317	1.0625	0.985354	0.338065	0.341265	0.314985
