# Supplementary material for: Covalent inhibition of endoplasmic reticulum chaperone GRP78 disconnects the transduction of ER stress signals to inflammation and lipid accumulation in diet-induced obese mice
Source: eLife. 2022 Feb 9;11:e72182. doi: 10.7554/eLife.72182 (PMC8828050; doi:10.7554/eLife.72182)
Supplement: Figure 6—source data 2. [file elife-72182-fig6-data2.xlsx]

## Sheet: Proteins
Checked	Master	Accession	Description	Coverage	# Peptides	# PSMs	# Unique Peptides	# Protein Groups	# AAs	MW [kDa]	calc. pI	Score Sequest HT	# Peptides Sequest HT
TRUE	Master Protein	GRP78	Endoplasmic reticulum chaperone BiP OS=Mus musculus OX=10090 GN=Hspa5 PE=1 SV=3	92.4812	148	2639	148	1	665	73.5	5.45	5534.43	148
	Checked	Confidence	Sequence	Modifications	# Protein Groups	# Proteins	# PSMs	Master Protein Accessions	# Missed Cleavages	Theo. MH+ [Da]	XCorr Sequest HT	Confidence Sequest HT
	TRUE	High	VEIIANDQGNRITPSYVAFTPEGERLIGDAAK		1	1	4	GRP78	2	3444.78	9.47	High
	TRUE	High	ALSSQHQARIEIESFFEGEDFSETLTR		1	1	57	GRP78	1	3127.5	8.84	High
	TRUE	High	AVEEKIEWLESHQDADIEDFKAK		1	1	10	GRP78	2	2730.33	8.3	High
	TRUE	High	TKPYIQVDIGGGQTKTFAPEEISAMVLTK		1	1	6	GRP78	1	3122.64	7.85	High
	TRUE	High	VTHAVVTVPAYFNDAQRQATKDAGTIAGLNVMR		1	1	3	GRP78	2	3514.82	7.83	High
	TRUE	High	VTHAVVTVPAYFNDAQRQATKDAGTIAGLNVMR	1xDeamidated [N13]	1	1	7	GRP78	2	3515.81	7.81	High
	TRUE	High	ITPSYVAFTPEGERLIGDAAKNQLTSNPENTVFDAK	1xDeamidated [Q/N]	1	1	10	GRP78	2	3894.94	7.35	High
	TRUE	High	KTKPYIQVDIGGGQTKTFAPEEISAMVLTK		1	1	3	GRP78	2	3250.74	7.17	High
	TRUE	High	LIGDAAKNQLTSNPENTVFDAKR		1	1	21	GRP78	2	2502.29	7.15	High
	TRUE	High	RALSSQHQARIEIESFFEGEDFSETLTR		1	1	3	GRP78	2	3283.6	7.09	High
	TRUE	High	VEIIANDQGNRITPSYVAFTPEGERLIGDAAK	1xDeamidated [Q/N]	1	1	15	GRP78	2	3445.76	6.99	High
	TRUE	High	KSQIFSTASDNQPTVTIK		1	1	12	GRP78	1	1965.03	6.93	High
	TRUE	High	VVEKKTKPYIQVDIGGGQTK		1	1	3	GRP78	2	2188.23	6.77	High
	TRUE	High	TKPYIQVDIGGGQTKTFAPEEISAMVLTK	1xOxidation [M25]	1	1	4	GRP78	1	3138.64	6.7	High
	TRUE	High	IINEPTAAAIAYGLDKREGEK		1	1	6	GRP78	2	2259.2	6.43	High
	TRUE	High	VYEGERPLTKDNHLLGTFDLTGIPPAPR		1	1	43	GRP78	1	3106.63	6.34	High
	TRUE	High	IEWLESHQDADIEDFKAK		1	1	5	GRP78	1	2174.04	6.33	High
	TRUE	High	KSDIDEIVLVGGSTRIPK		1	1	5	GRP78	2	1927.09	6.32	High
	TRUE	High	NELESYAYSLKNQIGDKEK		1	1	4	GRP78	2	2229.1	6.31	High
	TRUE	High	KSQIFSTASDNQPTVTIK	1xDeamidated [Q/N]	1	1	8	GRP78	1	1966.01	6.27	High
	TRUE	High	VTHAVVTVPAYFNDAQRQATKDAGTIAGLNVMR	1xDeamidated [Q/N]; 1xOxidation [M32]	1	1	17	GRP78	2	3531.8	6.24	High
	TRUE	High	LYGSGGPPPTGEEDTSEKDEL		1	1	37	GRP78	1	2177.97	6.22	High
	TRUE	High	VTHAVVTVPAYFNDAQRQATKDAGTIAGLNVMR	1xOxidation [M32]	1	1	6	GRP78	2	3530.82	6.19	High
	TRUE	High	IDTRNELESYAYSLKNQIGDK		1	1	3	GRP78	2	2457.23	6.11	High
	TRUE	High	LIGDAAKNQLTSNPENTVFDAKR	1xDeamidated [Q/N]	1	1	30	GRP78	2	2503.28	6.11	High
	TRUE	High	LIGRTWNDPSVQQDIKFLPFK		1	1	3	GRP78	2	2502.35	6.05	High
	TRUE	High	VTHAVVTVPAYFNDAQRQATK	1xDeamidated [N13]	1	1	16	GRP78	1	2317.19	6.03	High
	TRUE	High	VLEDSDLKKSDIDEIVLVGGSTR		1	1	74	GRP78	2	2488.31	6.01	High
	TRUE	High	VTHAVVTVPAYFNDAQRQATK		1	1	9	GRP78	1	2316.21	5.98	High
	TRUE	High	NKITITNDQNRLTPEEIER		1	1	6	GRP78	2	2284.19	5.97	High
	TRUE	High	ITITNDQNRLTPEEIERMVNDAEK		1	1	2	GRP78	2	2829.4	5.87	High
	TRUE	High	SQIFSTASDNQPTVTIKVYEGERPLTK		1	1	5	GRP78	1	3009.55	5.86	High
	TRUE	High	LGGKLSSEDKETMEK		1	1	47	GRP78	2	1651.82	5.8	High
	TRUE	High	AVEEKIEWLESHQDADIEDFK		1	1	2	GRP78	1	2531.19	5.75	High
	TRUE	High	KVTHAVVTVPAYFNDAQR		1	1	13	GRP78	1	2016.07	5.74	High
	TRUE	High	NELESYAYSLKNQIGDKEK	1xDeamidated [N]	1	1	6	GRP78	2	2230.09	5.73	High
	TRUE	High	KVTHAVVTVPAYFNDAQR	1xDeamidated [N14]	1	1	11	GRP78	1	2017.05	5.71	High
	TRUE	High	TWNDPSVQQDIKFLPFKVVEK		1	1	3	GRP78	2	2518.33	5.7	High
	TRUE	High	LIGDAAKNQLTSNPENTVFDAK		1	1	9	GRP78	1	2346.19	5.68	High
	TRUE	High	ALSSQHQARIEIESFFEGEDFSETLTR	1xDeamidated [Q]	1	1	73	GRP78	1	3128.48	5.67	High
	TRUE	High	VEIIANDQGNRITPSYVAFTPEGER	1xDeamidated [N/Q]	1	1	14	GRP78	1	2777.37	5.66	High
	TRUE	High	VEIIANDQGNRITPSYVAFTPEGER		1	1	4	GRP78	1	2776.39	5.65	High
	TRUE	High	LTPEEIERMVNDAEKFAEEDK	1xOxidation [M9]	1	1	3	GRP78	2	2509.18	5.64	High
	TRUE	High	NQLTSNPENTVFDAKR	1xDeamidated [N/Q]	1	1	16	GRP78	1	1834.89	5.62	High
	TRUE	High	KTKPYIQVDIGGGQTKTFAPEEISAMVLTK	1xOxidation [M26]	1	1	2	GRP78	2	3266.73	5.61	High
	TRUE	High	NQLTSNPENTVFDAKR		1	1	24	GRP78	1	1833.91	5.58	High
	TRUE	High	IQQLVKEFFNGKEPSR		1	1	22	GRP78	2	1920.03	5.57	High
	TRUE	High	NGRVEIIANDQGNRITPSYVAFTPEGER	1xDeamidated [N/Q]	1	1	21	GRP78	2	3104.54	5.55	High
	TRUE	High	KELEEIVQPIISK		1	1	4	GRP78	1	1525.88	5.43	High
	TRUE	High	NKITITNDQNRLTPEEIER	1xDeamidated [N/Q]	1	1	16	GRP78	2	2285.17	5.37	High
	TRUE	High	RALSSQHQAR		1	1	7	GRP78	1	1153.62	5.37	High
	TRUE	High	GTGNKNKITITNDQNR		1	1	3	GRP78	2	1773.92	5.36	High
	TRUE	High	IEIESFFEGEDFSETLTR		1	1	88	GRP78	0	2149	5.31	High
	TRUE	High	KSDIDEIVLVGGSTR		1	1	6	GRP78	1	1588.85	5.31	High
	TRUE	High	KTKPYIQVDIGGGQTK		1	1	12	GRP78	1	1732.96	5.27	High
	TRUE	High	STMKPVQKVLEDSDLK		1	1	4	GRP78	1	1817.97	5.25	High
	TRUE	High	ITPSYVAFTPEGERLIGDAAK		1	1	14	GRP78	1	2235.17	5.22	High
	TRUE	High	NGRVEIIANDQGNRITPSYVAFTPEGER		1	1	2	GRP78	2	3103.56	5.2	High
	TRUE	High	VYEGERPLTKDNHLLGTFDLTGIPPAPR	1xDeamidated [N12]	1	1	13	GRP78	1	3107.62	5.15	High
	TRUE	High	KKELEEIVQPIISK		1	1	10	GRP78	2	1653.98	5.15	High
	TRUE	High	QATKDAGTIAGLNVMR		1	1	14	GRP78	1	1645.87	5.14	High
	TRUE	High	IINEPTAAAIAYGLDKR		1	1	41	GRP78	1	1816	5.12	High
	TRUE	High	MKETAEAYLGKK	1xOxidation [M1]	1	1	24	GRP78	2	1384.71	5.1	High
	TRUE	High	DNHLLGTFDLTGIPPAPR		1	1	23	GRP78	0	1934.01	5.1	High
	TRUE	High	NGRVEIIANDQGNRITPSYVAFTPEGER	2xDeamidated [N1; N9]	1	1	12	GRP78	2	3105.52	5.08	High
	TRUE	High	AVEEKIEWLESHQDADIEDFKAK	1xDeamidated [Q13]	1	1	4	GRP78	2	2731.31	5.07	High
	TRUE	High	LTPEEIERMVNDAEKFAEEDK		1	1	1	GRP78	2	2493.18	5.07	High
	TRUE	High	LIGDAAKNQLTSNPENTVFDAK	1xDeamidated [N/Q]	1	1	13	GRP78	1	2347.18	5.04	High
	TRUE	High	IEWLESHQDADIEDFK		1	1	2	GRP78	0	1974.91	5.03	High
	TRUE	High	NQLTSNPENTVFDAKRLIGR		1	1	3	GRP78	2	2273.2	5.01	High
	TRUE	High	TWNDPSVQQDIKFLPFK		1	1	5	GRP78	1	2063.06	5	High
	TRUE	High	VTHAVVTVPAYFNDAQR		1	1	21	GRP78	0	1887.97	5	High
	TRUE	High	GSHMASMTGGQQMGR	1xOxidation [M]	1	1	57	GRP78	0	1551.65	4.99	High
	TRUE	High	ITPSYVAFTPEGERLIGDAAKNQLTSNPENTVFDAK	2xDeamidated [N22; N27]	1	1	3	GRP78	2	3895.92	4.94	High
	TRUE	High	SQIFSTASDNQPTVTIKVYEGERPLTKDNHLLGTFDLTGIPPAPR		1	1	5	GRP78	2	4924.55	4.9	High
	TRUE	High	MVNDAEKFAEEDKK		1	1	5	GRP78	2	1653.78	4.87	High
	TRUE	High	SQIFSTASDNQPTVTIK		1	1	57	GRP78	0	1836.93	4.86	High
	TRUE	High	LGGKLSSEDKETMEK	1xOxidation [M13]	1	1	14	GRP78	2	1667.82	4.86	High
	TRUE	High	SDIDEIVLVGGSTRIPK		1	1	2	GRP78	1	1798.99	4.83	High
	TRUE	High	TFAPEEISAMVLTKMKETAEAYLGK	1xOxidation [M10]	1	1	11	GRP78	2	2774.4	4.82	High
	TRUE	High	VTHAVVTVPAYFNDAQR	1xDeamidated [N/Q]	1	1	7	GRP78	0	1888.96	4.77	High
	TRUE	High	GSHMASMTGGQQMGR	1xDeamidated [Q]	1	1	19	GRP78	0	1536.64	4.76	High
	TRUE	High	IQQLVKEFFNGKEPSR	1xDeamidated [N/Q]	1	1	50	GRP78	2	1921.02	4.75	High
	TRUE	High	MKETAEAYLGKK		1	1	27	GRP78	2	1368.72	4.72	High
	TRUE	High	QATKDAGTIAGLNVMR	1xDeamidated [N/Q]	1	1	9	GRP78	1	1646.85	4.72	High
	TRUE	High	IINEPTAAAIAYGLDK		1	1	3	GRP78	0	1659.9	4.69	High
	TRUE	High	AKFEELNMDLFRSTMKPVQK		1	1	3	GRP78	2	2412.24	4.66	High
	TRUE	High	SQIFSTASDNQPTVTIK	1xDeamidated [Q/N]	1	1	14	GRP78	0	1837.92	4.65	High
	TRUE	High	IQQLVKEFFNGK	1xDeamidated [N10]	1	1	3	GRP78	1	1451.79	4.65	High
	TRUE	High	IQQLVKEFFNGKEPSR	2xDeamidated [Q2; Q/N]	1	1	5	GRP78	2	1922	4.63	High
	TRUE	High	LSSEDKETMEKAVEEK	1xOxidation [M9]	1	1	3	GRP78	2	1868.88	4.63	High
	TRUE	High	ELEEIVQPIISKLYGSGGPPPTGEEDTSEKDEL		1	1	3	GRP78	2	3556.74	4.62	High
	TRUE	High	MVNDAEKFAEEDKK	1xDeamidated [N3]; 1xOxidation [M1]	1	1	7	GRP78	2	1670.76	4.6	High
	TRUE	High	KVTHAVVTVPAYFNDAQRQATK	1xDeamidated [N/Q]	1	1	3	GRP78	2	2445.29	4.58	High
	TRUE	High	NQLTSNPENTVFDAKR	2xDeamidated [Q/N]	1	1	6	GRP78	1	1835.88	4.57	High
	TRUE	High	SQIFSTASDNQPTVTIKVYEGERPLTKDNHLLGTFDLTGIPPAPR	1xDeamidated [N/Q]	1	1	5	GRP78	2	4925.53	4.57	High
	TRUE	High	MVNDAEKFAEEDKK	1xOxidation [M1]	1	1	11	GRP78	2	1669.77	4.56	High
	TRUE	High	KTKPYIQVDIGGGQTKTFAPEEISAMVLTK	1xDeamidated [Q]; 1xOxidation [M26]	1	1	4	GRP78	2	3267.72	4.52	High
	TRUE	High	AKFEELNMDLFRSTMKPVQK	1xOxidation [M]	1	1	6	GRP78	2	2428.24	4.51	High
	TRUE	High	VTAEDKGTGNKNK		1	1	24	GRP78	2	1361.7	4.5	High
	TRUE	High	NQLTSNPENTVFDAK		1	1	15	GRP78	0	1677.81	4.43	High
	TRUE	High	NGRVEIIANDQGNR	1xDeamidated [N/Q]	1	1	25	GRP78	1	1556.78	4.42	High
	TRUE	High	LSSEDKETMEKAVEEK		1	1	3	GRP78	2	1852.88	4.41	High
	TRUE	High	ETAEAYLGKKVTHAVVTVPAYFNDAQR		1	1	3	GRP78	2	2978.54	4.37	High
	TRUE	High	NGRVEIIANDQGNR		1	1	19	GRP78	1	1555.79	4.37	High
	TRUE	High	IINEPTAAAIAYGLDKR	1xDeamidated [N3]	1	1	6	GRP78	1	1816.98	4.36	High
	TRUE	High	NGRVEIIANDQGNR	2xDeamidated [N1; N9]	1	1	10	GRP78	1	1557.76	4.33	High
	TRUE	High	TFAPEEISAMVLTK	1xOxidation [M10]	1	1	24	GRP78	0	1552.79	4.33	High
	TRUE	High	ITITNDQNRLTPEEIERMVNDAEK	1xOxidation [M18]	1	1	2	GRP78	2	2845.4	4.31	High
	TRUE	High	ITITNDQNRLTPEEIER		1	1	12	GRP78	1	2042.05	4.28	High
	TRUE	High	GSHMASMTGGQQMGR		1	1	29	GRP78	0	1535.65	4.27	High
	TRUE	High	IDTRNELESYAYSLK		1	1	14	GRP78	1	1801.9	4.25	High
	TRUE	High	MVNDAEKFAEEDKK	1xDeamidated [N3]	1	1	8	GRP78	2	1654.76	4.24	High
	TRUE	High	IDTRNELESYAYSLK	1xDeamidated [N5]	1	1	5	GRP78	1	1802.88	4.23	High
	TRUE	High	ITITNDQNRLTPEEIER	1xDeamidated [N/Q]	1	1	17	GRP78	1	2043.04	4.21	High
	TRUE	High	ITPSYVAFTPEGER		1	1	12	GRP78	0	1566.78	4.19	High
	TRUE	High	GSHMASMTGGQQMGR	2xOxidation [M7; M]	1	1	65	GRP78	0	1567.64	4.18	High
	TRUE	High	AKFEELNMDLFR	1xOxidation [M8]	1	1	42	GRP78	1	1528.75	4.18	High
	TRUE	High	NGRVEIIANDQGNRITPSYVAFTPEGER	3xDeamidated [N1; N9; N13]	1	1	4	GRP78	2	3106.51	4.17	High
	TRUE	High	AKFEELNMDLFR	1xDeamidated [N7]	1	1	6	GRP78	1	1513.74	4.15	High
	TRUE	High	KVTHAVVTVPAYFNDAQRQATK		1	1	1	GRP78	2	2444.3	4.14	High
	TRUE	High	GTGNKNKITITNDQNR	1xDeamidated [N]	1	1	6	GRP78	2	1774.9	4.05	High
	TRUE	High	KKELEEIVQPIISK	1xDeamidated [Q9]	1	1	2	GRP78	2	1654.96	4.04	High
	TRUE	High	LSSEDKETMEK	1xOxidation [M9]	1	1	7	GRP78	1	1312.59	4.03	High
	TRUE	High	STMKPVQKVLEDSDLKK		1	1	3	GRP78	2	1946.06	4	High
	TRUE	High	STMKPVQKVLEDSDLK	1xOxidation [M3]	1	1	6	GRP78	1	1833.96	3.99	High
	TRUE	High	ERIDTRNELESYAYSLK		1	1	5	GRP78	2	2087.04	3.98	High
	TRUE	High	VMEHFIKLYK		1	1	2	GRP78	1	1307.72	3.98	High
	TRUE	High	NELESYAYSLKNQIGDKEK	2xDeamidated [N1; N12]	1	1	2	GRP78	2	2231.07	3.97	High
	TRUE	High	QATKDAGTIAGLNVMR	1xOxidation [M15]	1	1	38	GRP78	1	1661.86	3.96	High
	TRUE	High	AKFEELNMDLFR		1	1	17	GRP78	1	1512.75	3.95	High
	TRUE	High	LSSEDKETMEK		1	1	6	GRP78	1	1296.6	3.94	High
	TRUE	High	MVNDAEKFAEEDK		1	1	2	GRP78	1	1525.68	3.92	High
	TRUE	High	NTVVPTKKSQIFSTASDNQPTVTIK		1	1	12	GRP78	2	2704.45	3.91	High
	TRUE	High	KTKPYIQVDIGGGQTK	1xDeamidated [Q14]	1	1	2	GRP78	1	1733.94	3.88	High
	TRUE	High	STMKPVQKVLEDSDLKK	1xOxidation [M3]	1	1	3	GRP78	2	1962.06	3.88	High
	TRUE	High	MKETAEAYLGK	1xOxidation [M1]	1	1	15	GRP78	1	1256.62	3.87	High
	TRUE	High	ELEEIVQPIISK		1	1	8	GRP78	0	1397.79	3.87	High
	TRUE	High	LIGDAAKNQLTSNPENTVFDAKR	2xDeamidated [N/Q]	1	1	5	GRP78	2	2504.26	3.85	High
	TRUE	High	MKETAEAYLGK		1	1	14	GRP78	1	1240.62	3.83	High
	TRUE	High	IQQLVKEFFNGK		1	1	2	GRP78	1	1450.81	3.83	High
	TRUE	High	TFAPEEISAMVLTK		1	1	10	GRP78	0	1536.8	3.81	High
	TRUE	High	NQLTSNPENTVFDAK	1xDeamidated [N/Q]	1	1	8	GRP78	0	1678.79	3.81	High
	TRUE	High	NKITITNDQNRLTPEEIER	2xDeamidated [Q/N]	1	1	5	GRP78	2	2286.16	3.8	High
	TRUE	High	TWNDPSVQQDIKFLPFK	1xDeamidated [Q8]	1	1	1	GRP78	1	2064.04	3.78	High
	TRUE	High	SDIDEIVLVGGSTR		1	1	4	GRP78	0	1460.76	3.73	High
	TRUE	High	DAGTIAGLNVMR		1	1	9	GRP78	0	1217.63	3.7	High
	TRUE	High	ETAEAYLGKKVTHAVVTVPAYFNDAQR	1xDeamidated [N23]	1	1	2	GRP78	2	2979.52	3.68	High
	TRUE	High	QATKDAGTIAGLNVMR	1xDeamidated [Q1]; 1xOxidation [M15]	1	1	3	GRP78	1	1662.85	3.68	High
	TRUE	High	NKITITNDQNR		1	1	6	GRP78	1	1316.69	3.66	High
	TRUE	High	NKITITNDQNR	1xDeamidated [Q/N]	1	1	8	GRP78	1	1317.68	3.66	High
	TRUE	High	LIGRTWNDPSVQQDIK		1	1	6	GRP78	1	1869.98	3.65	High
	TRUE	High	DAGTIAGLNVMR	1xDeamidated [N9]	1	1	3	GRP78	0	1218.61	3.65	High
	TRUE	High	NTVVPTKKSQIFSTASDNQPTVTIK	1xDeamidated [N/Q]	1	1	25	GRP78	2	2705.44	3.64	High
	TRUE	High	TKPYIQVDIGGGQTK		1	1	17	GRP78	0	1604.86	3.62	High
	TRUE	High	AKFEELNMDLFR	1xDeamidated [N7]; 1xOxidation [M8]	1	1	2	GRP78	1	1529.73	3.62	High
	TRUE	High	GSHMASMTGGQQMGR	1xDeamidated [Q]; 2xOxidation [M4; M7]	1	1	10	GRP78	0	1568.63	3.54	High
	TRUE	High	GSHMASMTGGQQMGR	1xDeamidated [Q]; 1xOxidation [M4]	1	1	12	GRP78	0	1552.63	3.53	High
	TRUE	High	MVNDAEKFAEEDK	1xDeamidated [N3]	1	1	7	GRP78	1	1526.67	3.52	High
	TRUE	High	TKPYIQVDIGGGQTK	1xDeamidated [Q]	1	1	5	GRP78	0	1605.85	3.51	High
	TRUE	High	RALSSQHQARIEIESFFEGEDFSETLTR	1xDeamidated [Q]	1	1	2	GRP78	2	3284.58	3.48	High
	TRUE	High	TWNDPSVQQDIK		1	1	19	GRP78	0	1430.69	3.47	High
	TRUE	High	VTAEDKGTGNK		1	1	9	GRP78	1	1119.56	3.43	High
	TRUE	High	IEWLESHQDADIEDFKAKK		1	1	2	GRP78	2	2302.14	3.39	High
	TRUE	High	ITITNDQNRLTPEEIERMVNDAEK	1xDeamidated [N/Q]; 1xOxidation [M18]	1	1	5	GRP78	2	2846.38	3.39	High
	TRUE	High	ITITNDQNRLTPEEIERMVNDAEK	1xDeamidated [N/Q]	1	1	5	GRP78	2	2830.39	3.31	High
	TRUE	High	DAGTIAGLNVMR	1xOxidation [M11]	1	1	24	GRP78	0	1233.63	3.3	High
	TRUE	High	AKFEELNMDLFRSTMKPVQK	2xOxidation [M8; M15]	1	1	1	GRP78	2	2444.23	3.27	High
	TRUE	High	IPKIQQLVK		1	1	4	GRP78	1	1066.7	3.26	High
	TRUE	High	GSHMASMTGGQQMGR	3xOxidation [M4; M7; M13]	1	1	32	GRP78	0	1583.64	3.22	High
	TRUE	High	VTHAVVTVPAYFNDAQRQATKDAGTIAGLNVMR	2xDeamidated [Q/N]; 1xOxidation [M32]	1	1	5	GRP78	2	3532.79	3.19	High
	TRUE	High	LIPRNTVVPTKK	1xDeamidated [N5]	1	1	3	GRP78	2	1366.84	3.16	High
	TRUE	High	FAEEDKKLK		1	1	2	GRP78	2	1107.6	3.15	High
	TRUE	High	MVNDAEKFAEEDK	1xOxidation [M1]	1	1	2	GRP78	1	1541.68	3.13	High
	TRUE	High	ETAEAYLGKK		1	1	6	GRP78	1	1109.58	3.11	High
	TRUE	High	VEIIANDQGNR	1xDeamidated [N/Q]	1	1	7	GRP78	0	1229.61	3.1	High
	TRUE	High	VMEHFIKLYK	1xOxidation [M2]	1	1	3	GRP78	1	1323.71	3.08	High
	TRUE	High	ITPSYVAFTPEGERLIGDAAKNQLTSNPENTVFDAK		1	1	6	GRP78	2	3893.96	3.05	High
	TRUE	High	TWNDPSVQQDIK	1xDeamidated [Q/N]	1	1	4	GRP78	0	1431.68	3.04	High
	TRUE	High	VEIIANDQGNR		1	1	6	GRP78	0	1228.63	2.95	High
	TRUE	High	LTPEEIERMVNDAEK	1xOxidation [M9]	1	1	5	GRP78	1	1789.86	2.94	High
	TRUE	High	STMKPVQK		1	1	12	GRP78	0	918.508	2.93	High
	TRUE	High	ELEEIVQPIISK	1xDeamidated [Q7]	1	1	8	GRP78	0	1398.77	2.9	High
	TRUE	High	ALSSQHQAR		1	1	16	GRP78	0	997.517	2.9	High
	TRUE	High	NELESYAYSLK		1	1	2	GRP78	0	1316.64	2.88	High
	TRUE	High	STMKPVQK	1xOxidation [M3]	1	1	7	GRP78	0	934.503	2.86	High
	TRUE	High	FEELNMDLFR	1xOxidation [M6]	1	1	8	GRP78	0	1329.61	2.81	High
	TRUE	High	GVPQIEVTFEIDVNGILR		1	1	1	GRP78	0	1999.09	2.8	High
	TRUE	High	EFFNGKEPSR		1	1	8	GRP78	1	1210.59	2.77	High
	TRUE	High	FEELNMDLFR		1	1	1	GRP78	0	1313.62	2.76	High
	TRUE	High	VYEGERPLTK		1	1	22	GRP78	0	1191.64	2.75	High
	TRUE	High	FEELNMDLFR	1xDeamidated [N5]	1	1	2	GRP78	0	1314.6	2.73	High
	TRUE	High	KSQIFSTASDNQPTVTIKVYEGERPLTK	1xDeamidated [Q/N]	1	1	6	GRP78	2	3138.63	2.72	High
	TRUE	High	FLPFKVVEKK		1	1	5	GRP78	2	1234.76	2.68	High
	TRUE	High	VEIIANDQGNRITPSYVAFTPEGER	2xDeamidated [N6; N10]	1	1	1	GRP78	1	2778.36	2.68	High
	TRUE	High	KSQIFSTASDNQPTVTIKVYEGERPLTK		1	1	1	GRP78	2	3137.65	2.65	High
	TRUE	High	VLEDSDLKK		1	1	4	GRP78	1	1046.57	2.65	High
	TRUE	High	FEELNMDLFR	1xDeamidated [N5]; 1xOxidation [M6]	1	1	2	GRP78	0	1330.6	2.62	High
	TRUE	High	ITITNDQNR	1xDeamidated [N/Q]	1	1	7	GRP78	0	1075.54	2.61	High
	TRUE	High	VMEHFIK	1xOxidation [M2]	1	1	6	GRP78	0	919.471	2.55	High
	TRUE	High	NTVVPTKK		1	1	16	GRP78	1	886.536	2.52	High
	TRUE	High	VMEHFIKLYKK		1	1	2	GRP78	2	1435.81	2.49	High
	TRUE	High	EFFNGKEPSR	1xDeamidated [N4]	1	1	8	GRP78	1	1211.57	2.47	High
	TRUE	High	LTPEEIERMVNDAEK		1	1	3	GRP78	1	1773.87	2.44	High
	TRUE	High	NTVVPTKK	1xDeamidated [N1]	1	1	2	GRP78	1	887.52	2.44	High
	TRUE	High	DAGTIAGLNVMR	1xDeamidated [N9]; 1xOxidation [M11]	1	1	1	GRP78	0	1234.61	2.4	High
	TRUE	High	DNRAVQK		1	1	2	GRP78	1	830.448	2.38	High
	TRUE	High	TFAPEEISAMVLTKMKETAEAYLGK	2xOxidation [M10; M15]	1	1	2	GRP78	2	2790.39	2.33	High
	TRUE	High	LIPRNTVVPTKK		1	1	3	GRP78	2	1365.86	2.33	High
	TRUE	High	ETAEAYLGK		1	1	1	GRP78	0	981.489	2.32	High
	TRUE	High	ITITNDQNR		1	1	14	GRP78	0	1074.55	2.31	High
	TRUE	High	LTPEEIER		1	1	10	GRP78	0	986.515	2.28	High
	TRUE	High	ITITNDQNR	2xDeamidated [N5; N8]	1	1	1	GRP78	0	1076.52	2.21	High
	TRUE	High	NTVVPTK		1	1	9	GRP78	0	758.441	2.2	High
	TRUE	High	NQIGDKEK		1	1	1	GRP78	1	931.484	2.14	High
	TRUE	High	GSHMASMTGGQQMGR	2xDeamidated [Q11; Q12]; 2xOxidation [M7; M13]	1	1	3	GRP78	0	1569.61	2.14	High
	TRUE	High	VMEHFIK		1	1	3	GRP78	0	903.476	2.12	High
	TRUE	High	NTVVPTK	1xDeamidated [N1]	1	1	2	GRP78	0	759.425	2.07	High
	TRUE	High	EVEKAKR		1	1	1	GRP78	2	859.5	2.06	High
	TRUE	High	NQIGDKEK	1xDeamidated [Q/N]	1	1	12	GRP78	1	932.468	2.03	High
	TRUE	High	VLEDSDLK		1	1	4	GRP78	0	918.478	1.98	High
	TRUE	High	FAEEDKK		1	1	1	GRP78	1	866.425	1.97	High
	TRUE	High	IQQLVK		1	1	9	GRP78	0	728.466	1.94	High
	TRUE	High	MVNDAEK		1	1	1	GRP78	0	806.371	1.93	High
	TRUE	Medium	NTVVPTKKSQIFSTASDNQPTVTIK	2xDeamidated [Q10; N/Q]	1	1	4	GRP78	2	2706.42	2.27	Medium
	TRUE	Medium	NKITITNDQNR	2xDeamidated [N1; N7]	1	1	1	GRP78	1	1318.66	2.25	Medium
	TRUE	Medium	FLPFKVVEK		1	1	10	GRP78	1	1106.66	2.18	Medium
	TRUE	Medium	MVNDAEKFAEEDK	1xDeamidated [N3]; 1xOxidation [M1]	1	1	3	GRP78	1	1542.66	2.03	Medium
	TRUE	Medium	KEDVGTVVGIDLGTTYSCVGVFKNGR	1xDeamidated [N24]	1	1	12	GRP78	2	2715.37	1.95	Medium
	TRUE	Medium	FEELNMDLFRSTMKPVQKVLEDSDLK	1xDeamidated [Q/N]	1	1	4	GRP78	2	3113.55	1.95	Medium
	TRUE	Medium	NTVVPTKKSQIFSTASDNQPTVTIK	3xDeamidated [Q10; N18; Q/N]	1	1	2	GRP78	2	2707.4	1.94	Medium
	TRUE	Medium	KTKPYIQVDIGGGQTKTFAPEEISAMVLTK	2xDeamidated [Q7; Q14]	1	1	3	GRP78	2	3252.71	1.91	Medium
	TRUE	Medium	VTHAVVTVPAYFNDAQRQATKDAGTIAGLNVMR	2xDeamidated [N/Q]	1	1	2	GRP78	2	3516.79	1.81	Medium
	TRUE	Medium	ERIDTR		1	1	1	GRP78	1	789.421	1.78	Medium
	TRUE	Medium	KEDVGTVVGIDLGTTYSCVGVFKNGR		1	1	13	GRP78	2	2714.38	1.78	Medium
	TRUE	Medium	LIPRNTVVPTK	1xDeamidated [N5]	1	1	5	GRP78	1	1238.75	1.77	Medium
	TRUE	Medium	IQQLVK	1xDeamidated [Q]	1	1	4	GRP78	0	729.451	1.74	Medium
	TRUE	Medium	AVQKLR		1	1	1	GRP78	1	714.462	1.7	Medium
	TRUE	Medium	MVNDAEK	1xDeamidated [N3]	1	1	2	GRP78	0	807.355	1.67	Medium
	TRUE	Medium	LIPRNTVVPTK		1	1	1	GRP78	1	1237.76	1.66	Medium
	TRUE	Medium	DNRAVQKLR		1	1	1	GRP78	2	1099.63	1.54	Medium
	TRUE	Medium	AKFEELNMDLFRSTMKPVQK	1xDeamidated [N7]; 2xOxidation [M8; M15]	1	1	4	GRP78	2	2445.22	1.49	Medium
	TRUE	Medium	TFAPEEISAMVLTKMKETAEAYLGK		1	1	2	GRP78	2	2758.4	1.41	Medium
	TRUE	Medium	AVQKLRR		1	1	1	GRP78	2	870.563	1.39	Medium
	TRUE	Medium	LTPEEIERMVNDAEK	1xDeamidated [N11]; 1xOxidation [M9]	1	1	2	GRP78	1	1790.85	1.34	Medium
	TRUE	Medium	LIGDAAKNQLTSNPENTVFDAK	2xDeamidated [N/Q]	1	1	2	GRP78	1	2348.16	1.16	Medium
	TRUE	Medium	VTHAVVTVPAYFNDAQRQATK	2xDeamidated [Q16; N/Q]	1	1	5	GRP78	1	2318.18	1.15	Medium
	TRUE	Medium	EFFNGK		1	1	1	GRP78	0	741.357	1.15	Medium
	TRUE	Medium	TWNDPSVQQDIKFLPFKVVEK	1xDeamidated [Q]	1	1	2	GRP78	2	2519.32	1.12	Medium
	TRUE	Medium	LRREVEK		1	1	1	GRP78	2	929.553	1.11	Medium
	TRUE	Medium	LYGSGGPPPTGEEDTSEK		1	1	2	GRP78	0	1820.82	1.08	Medium
	TRUE	Medium	KSQIFSTASDNQPTVTIK	3xDeamidated [Q3; N11; Q12]	1	1	4	GRP78	1	1967.98	1.01	Medium
	TRUE	Medium	EFFNGK	1xDeamidated [N4]	1	1	1	GRP78	0	742.341	0.91	Medium
	TRUE	Medium	RLIGRTWNDPSVQQDIK		1	1	1	GRP78	2	2026.08	0.86	Medium
	TRUE	Low	TKPYIQVDIGGGQTKTFAPEEISAMVLTKMK	1xDeamidated [Q13]; 2xOxidation [M25; M30]	1	1	2	GRP78	2	3414.75	0.98	Low
	TRUE	Low	DAGTIAGLNVMRIINEPTAAAIAYGLDK	2xDeamidated [N9; N15]	1	1	2	GRP78	1	2860.48	0.97	Low
	TRUE	Low	KEDVGTVVGIDLGTTYSCVGVFK	1xC29H38O4 [C18]	1	1	1	GRP78	1	2837.49	0.96	Low
	TRUE	Low	NQLTSNPENTVFDAKRLIGR	2xDeamidated [N6; N9]	1	1	1	GRP78	2	2275.17	0.96	Low
	TRUE	Low	ITITNDQNRLTPEEIERMVNDAEK	2xDeamidated [N5; N8]; 1xOxidation [M18]	1	1	2	GRP78	2	2847.37	0.93	Low
	TRUE	Low	DNHLLGTFDLTGIPPAPRGVPQIEVTFEIDVNGILRVTAEDK		1	1	1	GRP78	2	4557.4	0.92	Low
	TRUE	Low	ITITNDQNRLTPEEIERMVNDAEK	2xDeamidated [N5; N8]	1	1	1	GRP78	2	2831.37	0.91	Low
	TRUE	Low	KVTHAVVTVPAYFNDAQRQATK	2xDeamidated [Q17; Q/N]	1	1	3	GRP78	2	2446.27	0.9	Low
	TRUE	Low	TKPYIQVDIGGGQTKTFAPEEISAMVLTK	1xDeamidated [Q13]; 1xOxidation [M25]	1	1	1	GRP78	1	3139.62	0.85	Low
	TRUE	Low	LIGRTWNDPSVQQDIK	3xDeamidated [N7; Q12; Q13]	1	1	1	GRP78	1	1872.93	0.77	Low
	TRUE	Low	FEELNMDLFRSTMKPVQK	1xDeamidated [Q17]; 2xOxidation [M6; M13]	1	1	1	GRP78	1	2246.08	0.77	Low
	TRUE	Low	DAGTIAGLNVMRIINEPTAAAIAYGLDK	1xDeamidated [N9]	1	1	1	GRP78	1	2859.49	0.77	Low
	TRUE	Low	NELESYAYSLK	1xDeamidated [N1]	1	1	1	GRP78	0	1317.62	0.74	Low
	TRUE	Low	GSHMASMTGGQQMGR	1xDeamidated [Q]; 3xOxidation [M4; M7; M13]	1	1	3	GRP78	0	1584.62	0.72	Low
	TRUE	Low	NQLTSNPENTVFDAK	3xDeamidated [N6; N9; N/Q]	1	1	4	GRP78	0	1680.76	0.69	Low
	TRUE	Low	VTHAVVTVPAYFNDAQR	2xDeamidated [N13; Q16]	1	1	1	GRP78	0	1889.94	0.68	Low
	TRUE	Low	NQLTSNPENTVFDAKRLIGR	1xDeamidated [N/Q]	1	1	3	GRP78	2	2274.18	0.66	Low
	TRUE	Low	LIGRTWNDPSVQQDIKFLPFK	2xDeamidated [Q12; Q/N]	1	1	6	GRP78	2	2504.32	0.64	Low
	TRUE	Low	KSQIFSTASDNQPTVTIK	2xDeamidated [Q3; Q/N]	1	1	4	GRP78	1	1967	0.62	Low
	TRUE	Low	FEELNMDLFRSTMKPVQK	2xDeamidated [N5; Q17]; 1xOxidation [M6]	1	1	1	GRP78	1	2231.07	0.6	Low
	TRUE	Low	AKFEELNMDLFRSTMKPVQK	1xDeamidated [N7]	1	1	1	GRP78	2	2413.23	0.59	Low
	TRUE	Low	NQLTSNPENTVFDAKRLIGR	3xDeamidated [N6; N9; Q/N]	1	1	2	GRP78	2	2276.15	0.58	Low
	TRUE	Low	RLIGRTWNDPSVQQDIK	1xDeamidated [Q]	1	1	2	GRP78	2	2027.07	0.58	Low
	TRUE	Low	EVEKAK		1	1	2	GRP78	1	703.398	0.57	Low
	TRUE	Low	HHHHHHSSGLVPR		1	1	2	GRP78	0	1537.76	0.54	Low
	TRUE	Low	KELEEIVQPIISKLYGSGGPPPTGEEDTSEK	1xDeamidated [Q8]	1	1	2	GRP78	2	3328.67	0.52	Low
	TRUE	Low	VMEHFIKLYKK	1xOxidation [M2]	1	1	1	GRP78	2	1451.81	0.47	Low
	TRUE	Low	GSHMASMTGGQQMGR	2xDeamidated [Q11; Q12]; 1xOxidation [M]	1	1	6	GRP78	0	1553.61	0.45	Low
	TRUE	Low	QATKDAGTIAGLNVMRIINEPTAAAIAYGLDK	3xDeamidated [Q1; N13; N19]; 1xOxidation [M15]	1	1	2	GRP78	2	3305.69	0.45	Low
	TRUE	Low	LIGRTWNDPSVQQDIK	1xDeamidated [N7]	1	1	3	GRP78	1	1870.97	0.45	Low
	TRUE	Low	KVTHAVVTVPAYFNDAQRQATK	3xDeamidated [N14; Q17; Q19]	1	1	1	GRP78	2	2447.26	0.45	Low
	TRUE	Low	LIGRTWNDPSVQQDIK	2xDeamidated [Q12; Q13]	1	1	1	GRP78	1	1871.95	0.44	Low
	TRUE	Low	DNHLLGTFDLTGIPPAPR	1xDeamidated [N2]	1	1	3	GRP78	0	1935	0.42	Low
	TRUE	Low	IQQLVKEFFNGK	2xDeamidated [Q2; N10]	1	1	1	GRP78	1	1452.77	0.41	Low
	TRUE	Low	GSEEDKKEDVGTVVGIDLGTTYSCVGVFK	1xC29H38O4 [C24]	1	1	1	GRP78	2	3482.75	0.4	Low
	TRUE	Low	AKFEELNMDLFRSTMKPVQK	1xDeamidated [Q19]; 1xOxidation [M]	1	1	2	GRP78	2	2429.22	0.4	Low
	TRUE	Low	KDNRAVQK	2xDeamidated [N3; Q7]	1	1	1	GRP78	2	960.511	0.4	Low
	TRUE	Low	FEELNMDLFRSTMKPVQK	1xDeamidated [Q/N]	1	1	3	GRP78	1	2214.09	0.4	Low
	TRUE	Low	IINEPTAAAIAYGLDK	1xDeamidated [N3]	1	1	1	GRP78	0	1660.88	0.39	Low
	TRUE	Low	KELEEIVQPIISK	1xDeamidated [Q8]	1	1	1	GRP78	1	1526.87	0.38	Low
	TRUE	Low	TKPYIQVDIGGGQTKTFAPEEISAMVLTKMK	2xDeamidated [Q6; Q13]; 1xOxidation [M]	1	1	2	GRP78	2	3399.74	0.36	Low
	TRUE	Low	ETAEAYLGKKVTHAVVTVPAYFNDAQR	2xDeamidated [N23; Q26]	1	1	1	GRP78	2	2980.51	0.36	Low
	TRUE	Low	EDVGTVVGIDLGTTYSCVGVFKNGRVEIIANDQGNR	2xDeamidated [N23; N31]; 1xC29H38O4 [C17]	1	1	1	GRP78	2	4248.14	0.33	Low
	TRUE	Low	IEWLESHQDADIEDFKAKK	1xDeamidated [Q8]	1	1	1	GRP78	2	2303.12	0.32	Low
	TRUE	Low	NQLTSNPENTVFDAKR	3xDeamidated [N6; N9; Q/N]	1	1	2	GRP78	1	1836.86	0.31	Low
	TRUE	Low	GSHMASMTGGQQMGRGSEEDKK	1xOxidation [M]	1	1	3	GRP78	2	2325	0.31	Low
	TRUE	Low	KVTHAVVTVPAYFNDAQR	2xDeamidated [N14; Q17]	1	1	1	GRP78	1	2018.03	0.3	Low
	TRUE	Low	VTHAVVTVPAYFNDAQRQATKDAGTIAGLNVMR	3xDeamidated [N13; Q16; N30]	1	1	1	GRP78	2	3517.77	0.28	Low
	TRUE	Low	GSHMASMTGGQQMGRGSEEDK		1	1	1	GRP78	1	2180.91	0.27	Low
	TRUE	Low	GINPDEAVAYGAAVQAGVLSGDQDTGDLVLLDVCPLTLGIETVGGVMTK	1xOxidation [M47]	1	1	1	GRP78	0	4858.44	0.27	Low
	TRUE	Low	KTKPYIQVDIGGGQTKTFAPEEISAMVLTK	1xDeamidated [Q]	1	1	2	GRP78	2	3251.72	0.25	Low
	TRUE	Low	TWNDPSVQQDIKFLPFK	3xDeamidated [N3; Q8; Q9]	1	1	1	GRP78	1	2066.01	0.25	Low
	TRUE	Low	EDVGTVVGIDLGTTYSCVGVFKNGRVEIIANDQGNR	1xDeamidated [N/Q]; 1xC29H38O4 [C17]	1	1	4	GRP78	2	4247.16	0.24	Low
	TRUE	Low	AKRALSSQHQAR	2xDeamidated [Q8; Q10]	1	1	2	GRP78	2	1354.72	0.24	Low
	TRUE	Low	KELEEIVQPIISKLYGSGGPPPTGEEDTSEK		1	1	1	GRP78	2	3327.68	0.24	Low
	TRUE	Low	GTGNKNKITITNDQNR	2xDeamidated [Q14; N15]	1	1	1	GRP78	2	1775.89	0.23	Low
	TRUE	Low	ERIDTRNELESYAYSLK	1xDeamidated [N7]	1	1	1	GRP78	2	2088.02	0.22	Low
	TRUE	Low	MVNDAEK	1xOxidation [M1]	1	1	1	GRP78	0	822.366	0.19	Low
	TRUE	Low	GVPQIEVTFEIDVNGILR	1xDeamidated [Q/N]	1	1	2	GRP78	0	2000.07	0.17	Low
	TRUE	Low	EDVGTVVGIDLGTTYSCVGVFKNGR	1xDeamidated [N23]	1	1	1	GRP78	1	2587.27	0.17	Low
	TRUE	Low	AVQKLRR	1xDeamidated [Q3]	1	1	1	GRP78	2	871.547	0.17	Low
	TRUE	Low	ITITNDQNRLTPEEIER	2xDeamidated [N8; N/Q]	1	1	2	GRP78	1	2044.02	0.15	Low
	TRUE	Low	AVEEKIEWLESHQDADIEDFK	1xDeamidated [Q13]	1	1	1	GRP78	1	2532.18	0.12	Low
	TRUE	Low	ETMEKAVEEK	1xOxidation [M3]	1	1	3	GRP78	1	1209.57	0.07	Low
	TRUE	Low	ETMEKAVEEK		1	1	1	GRP78	1	1193.57	0.06	Low
	TRUE	Low	FEELNMDLFRSTMKPVQK	2xDeamidated [N5; Q17]; 2xOxidation [M6; M13]	1	1	1	GRP78	1	2247.07	0.05	Low
	TRUE	Low	GSHMASMTGGQQMGRGSEEDK	1xDeamidated [Q]	1	1	2	GRP78	1	2181.9	0.05	Low
	TRUE	Low	GSHMASMTGGQQMGRGSEEDK	3xOxidation [M4; M7; M13]	1	1	1	GRP78	1	2228.9	0.05	Low
	TRUE	Low	FEELNMDLFRSTMKPVQKVLEDSDLK	1xOxidation [M]	1	1	2	GRP78	2	3128.56	0.04	Low
	TRUE	Low	GSHMASMTGGQQMGRGSEEDKK	3xOxidation [M4; M7; M13]	1	1	1	GRP78	2	2356.99	0.01	Low
TRUE	Master Protein	CON_00220327.3	Keratin, type II cytoskeletal 1	73.7578	82	242	64	1	644	66	8.12	187.96	82
	Checked	Confidence	Sequence	Modifications	# Protein Groups	# Proteins	# PSMs	Master Protein Accessions	# Missed Cleavages	Theo. MH+ [Da]	XCorr Sequest HT	Confidence Sequest HT
	TRUE	High	FLEQQNQVLQTKWELLQQVDTSTR		1	1	1	CON_00220327.3	1	2932.52	6.75	High
	TRUE	High	NKLNDLEDALQQAKEDLAR		1	1	2	CON_00220327.3	2	2184.13	6.52	High
	TRUE	High	QISNLQQSISDAEQRGENALKDAK		1	1	1	CON_00220327.3	2	2643.33	5.77	High
	TRUE	High	TNAENEFVTIKKDVDGAYMTK		1	1	1	CON_00220327.3	2	2374.16	5.44	High
	TRUE	High	SKAEAESLYQSKYEELQITAGR		1	1	2	CON_00220327.3	2	2501.25	5.4	High
	TRUE	High	GSYGSGGSSYGSGGGSYGSGGGGGGHGSYGSGSSSGGYR		1	1	1	CON_00220327.3	0	3312.31	4.75	High
	TRUE	High	GSYGSGGSSYGSGGGSYGSGGGGGGHGSYGSGSSSGGYRGGSGGGGGGSSGGR		1	1	2	CON_00220327.3	1	4299.72	4.39	High
	TRUE	High	AEAESLYQSKYEELQITAGR		1	1	2	CON_00220327.3	1	2286.12	4.33	High
	TRUE	High	SKAEAESLYQSK		1	1	2	CON_00220327.3	1	1340.67	4.22	High
	TRUE	High	GGGGGGYGSGGSSYGSGGGSYGSGGGGGGGR		1	1	3	CON_00220327.3	0	2383.95	4.17	High
	TRUE	High	FLEQQNQVLQTK		7	7	1	CON_00468956.4; CON_00347110.2; CON_IPI00376379.3; IPI:CON_00714876.1; CON_00021304.1; CON_00462140.1; CON_00220327.3	0	1475.79	4.12	High
	TRUE	High	THNLEPYFESFINNLRR		1	1	2	CON_00220327.3	1	2150.08	4.03	High
	TRUE	High	GGSGGGGGGSSGGRGSGGGSSGGSIGGR		1	1	4	CON_00220327.3	1	2079.91	3.99	High
	TRUE	High	SLNNQFASFIDKVR		2	2	3	IPI:CON_00714876.1; CON_00220327.3	1	1638.86	3.96	High
	TRUE	High	THNLEPYFESFINNLR		1	1	2	CON_00220327.3	0	1993.98	3.92	High
	TRUE	High	TNAENEFVTIKK		1	1	3	CON_00220327.3	1	1393.73	3.88	High
	TRUE	High	EQIKSLNNQFASFIDKVR		2	2	2	IPI:CON_00714876.1; CON_00220327.3	2	2137.14	3.85	High
	TRUE	High	SLNNQFASFIDKVR	1xDeamidated [N3]	2	2	2	IPI:CON_00714876.1; CON_00220327.3	1	1639.84	3.72	High
	TRUE	High	GSGGGSSGGSIGGR		1	1	1	CON_00220327.3	0	1092.5	3.7	High
	TRUE	High	WELLQQVDTSTR		1	1	1	CON_00220327.3	0	1475.75	3.55	High
	TRUE	High	SGGGFSSGSAGIINYQR		1	1	1	CON_00220327.3	0	1657.79	3.45	High
	TRUE	High	LLRDYQELMNTK	1xOxidation [M9]	3	3	3	CON_00622240.4; IPI:CON_00714876.1; CON_00220327.3	1	1539.78	3.4	High
	TRUE	High	SLDLDSIIAEVK		5	5	1	CON_00131368.3; CON_00221797.1; IPI:CON_00697851.1; CON_00220327.3; CON_00139301.3	0	1302.72	3.38	High
	TRUE	High	AEAESLYQSKYEELQITAGR	1xDeamidated [Q8]	1	1	1	CON_00220327.3	1	2287.11	3.05	High
	TRUE	High	YEELQITAGR		2	2	3	CON_IPI00293665.9; CON_00220327.3	0	1179.6	2.96	High
	TRUE	High	SLNNQFASFIDK		2	2	2	IPI:CON_00714876.1; CON_00220327.3	0	1383.69	2.95	High
	TRUE	High	DVDGAYMTKVDLQAK		1	1	1	CON_00220327.3	1	1653.82	2.87	High
	TRUE	High	NSKIEISELNR		1	1	1	CON_00220327.3	1	1302.7	2.83	High
	TRUE	High	NKYEDEINKR		11	12	5	CON_IPI00748057.2; CON_IPI00293665.9; CON_00300725.7; CON_00124499.2; IPI:CON_00697851.1; CON_00299145.9; CON_00462140.1; CON_00220327.3; CON_IPI00554648.3; CON_00139301.3; CON_00009867.3	2	1308.65	2.8	High
	TRUE	High	DVDGAYMTKVDLQAK	1xOxidation [M7]	1	1	2	CON_00220327.3	1	1669.81	2.68	High
	TRUE	High	LLRDYQELMNTK		3	3	2	CON_00622240.4; IPI:CON_00714876.1; CON_00220327.3	1	1523.79	2.56	High
	TRUE	High	AEAESLYQSK		1	1	1	CON_00220327.3	0	1125.54	2.56	High
	TRUE	High	TNAENEFVTIKK	1xDeamidated [N2]	1	1	2	CON_00220327.3	1	1394.72	2.54	High
	TRUE	High	SISISVAR		1	1	1	CON_00220327.3	0	832.489	2.16	High
	TRUE	High	RVDQLK		1	1	2	CON_00220327.3	1	758.452	2.04	High
	TRUE	High	TLLEGEESR		2	2	1	IPI:CON_00714876.1; CON_00220327.3	0	1033.52	2.04	High
	TRUE	High	SLVNLGGSK		1	1	1	CON_00220327.3	0	874.499	1.96	High
	TRUE	Medium	LRSEIDNVKK		3	3	1	IPI:CON_00697851.1; CON_00220327.3; CON_00139301.3	2	1201.69	2.11	Medium
	TRUE	Medium	NSKIEISELNRVIQR		1	1	1	CON_00220327.3	2	1799.01	2.02	Medium
	TRUE	Medium	SDQSRLDSELK		2	2	2	IPI:CON_00714876.1; CON_00220327.3	1	1277.63	1.91	Medium
	TRUE	Medium	THNLEPYFESFINNLR	1xDeamidated [N3]	1	1	1	CON_00220327.3	0	1994.96	1.83	Medium
	TRUE	Medium	KDVDGAYMTK		1	1	1	CON_00220327.3	1	1127.54	1.78	Medium
	TRUE	Medium	DVDGAYMTK		1	1	1	CON_00220327.3	0	999.445	1.61	Medium
	TRUE	Medium	RTNAENEFVTIKK	1xDeamidated [N3]	1	1	3	CON_00220327.3	2	1550.82	1.52	Medium
	TRUE	Medium	DVDGAYMTK	1xOxidation [M7]	1	1	1	CON_00220327.3	0	1015.44	1.52	Medium
	TRUE	Medium	DYQELMNTK	1xOxidation [M6]	3	3	1	CON_00622240.4; IPI:CON_00714876.1; CON_00220327.3	0	1157.51	1.31	Medium
	TRUE	Medium	RRVDQLK		1	1	1	CON_00220327.3	2	914.553	1.13	Medium
	TRUE	Medium	THNLEPYFESFINNLRR	1xDeamidated [N]	1	1	2	CON_00220327.3	1	2151.06	0.92	Medium
	TRUE	Medium	GENALKDAKNK	2xDeamidated [N3; N10]	1	1	1	CON_00220327.3	2	1189.61	0.88	Medium
	TRUE	Medium	RVDQLK	1xDeamidated [Q4]	1	1	1	CON_00220327.3	1	759.436	0.88	Medium
	TRUE	Low	SLDLDSIIAEVKAQNEDIAQKSK	1xDeamidated [Q/N]	1	1	2	CON_00220327.3	2	2516.31	0.95	Low
	TRUE	Low	SLNNQFASFIDKVRFLEQQNQVLQTK	2xDeamidated [Q/N]	2	2	4	IPI:CON_00714876.1; CON_00220327.3	2	3097.6	0.83	Low
	TRUE	Low	KQISNLQQSISDAEQR	1xDeamidated [Q/N]	1	1	15	CON_00220327.3	1	1845.93	0.81	Low
	TRUE	Low	KQISNLQQSISDAEQR	3xDeamidated [Q7; Q/N]	1	1	17	CON_00220327.3	1	1847.9	0.79	Low
	TRUE	Low	NKLNDLEDALQQAK	3xDeamidated [N4; Q11; Q12]	1	1	1	CON_00220327.3	1	1602.79	0.74	Low
	TRUE	Low	YEDEINKRTNAENEFVTIK	2xDeamidated [N10; N]	1	1	5	CON_00220327.3	2	2315.1	0.71	Low
	TRUE	Low	KQISNLQQSISDAEQRGENALK	1xDeamidated [Q/N]	1	1	28	CON_00220327.3	2	2458.25	0.71	Low
	TRUE	Low	YEELQITAGRHGDSVRNSK	1xDeamidated [Q/N]	1	1	2	CON_00220327.3	2	2161.06	0.7	Low
	TRUE	Low	WELLQQVDTSTRTHNLEPYFESFINNLR		1	1	1	CON_00220327.3	1	3450.71	0.68	Low
	TRUE	Low	EQIKSLNNQFASFIDKVR	1xDeamidated [Q2]	2	2	1	IPI:CON_00714876.1; CON_00220327.3	2	2138.12	0.64	Low
	TRUE	Low	SEIDNVKKQISNLQQSISDAEQR	1xDeamidated [N12]	1	1	1	CON_00220327.3	2	2631.32	0.63	Low
	TRUE	Low	SEIDNVKKQISNLQQSISDAEQR	3xDeamidated [N5; Q9; N12]	1	1	1	CON_00220327.3	2	2633.29	0.6	Low
	TRUE	Low	KDVDGAYMTKVDLQAK	1xDeamidated [Q14]	1	1	1	CON_00220327.3	2	1782.89	0.55	Low
	TRUE	Low	MSRQFSSRSGYR		1	1	1	CON_00220327.3	2	1461.7	0.55	Low
	TRUE	Low	VRFLEQQNQVLQTK	1xDeamidated [Q/N]	7	7	4	CON_00468956.4; CON_00347110.2; CON_IPI00376379.3; IPI:CON_00714876.1; CON_00021304.1; CON_00462140.1; CON_00220327.3	1	1731.94	0.54	Low
	TRUE	Low	MSRQFSSRSGYR	1xDeamidated [Q4]	1	1	2	CON_00220327.3	2	1462.69	0.54	Low
	TRUE	Low	FLEQQNQVLQTK	3xDeamidated [Q4; Q5; N/Q]	7	7	2	CON_00468956.4; CON_00347110.2; CON_IPI00376379.3; IPI:CON_00714876.1; CON_00021304.1; CON_00462140.1; CON_00220327.3	0	1478.74	0.53	Low
	TRUE	Low	SLDLDSIIAEVKAQNEDIAQKSK	3xDeamidated [Q14; N15; Q20]	1	1	2	CON_00220327.3	2	2518.28	0.53	Low
	TRUE	Low	SLVNLGGSKSISISVARGGGR		1	1	2	CON_00220327.3	2	2015.14	0.5	Low
	TRUE	Low	QISNLQQSISDAEQR		1	1	2	CON_00220327.3	0	1716.85	0.5	Low
	TRUE	Low	GSSSGGVKSSGGSSSVR		1	1	1	CON_00220327.3	1	1482.71	0.47	Low
	TRUE	Low	SISISVARGGGR		1	1	1	CON_00220327.3	1	1159.65	0.45	Low
	TRUE	Low	FVSTTYSGVTR		1	1	1	CON_00220327.3	0	1217.62	0.44	Low
	TRUE	Low	DAKNKLNDLEDALQQAK	2xDeamidated [Q14; Q15]	1	1	1	CON_00220327.3	2	1915.96	0.42	Low
	TRUE	Low	GENALKDAKNK		1	1	1	CON_00220327.3	2	1187.64	0.42	Low
	TRUE	Low	AQNEDIAQKSKAEAESLYQSK	1xDeamidated [Q/N]	1	1	3	CON_00220327.3	2	2339.14	0.41	Low
	TRUE	Low	SLDLDSIIAEVKAQNEDIAQK	1xDeamidated [N/Q]	1	1	3	CON_00220327.3	1	2301.18	0.4	Low
	TRUE	Low	KDVDGAYMTKVDLQAK	1xOxidation [M8]	1	1	1	CON_00220327.3	2	1797.91	0.4	Low
	TRUE	Low	KQISNLQQSISDAEQRGENALK		1	1	7	CON_00220327.3	2	2457.27	0.36	Low
	TRUE	Low	SGGGGGRFSSCGGGGGSFGAGGGFGSRSLVNLGGSK	1xC29H38O4 [C11]	1	1	1	CON_00220327.3	2	3542.71	0.36	Low
	TRUE	Low	DYQELMNTKLALDLEIATYRTLLEGEESR		1	1	1	CON_00220327.3	2	3414.71	0.33	Low
	TRUE	Low	FLEQQNQVLQTKWELLQQVDTSTRTHNLEPYFESFINNLR		1	1	1	CON_00220327.3	2	4907.48	0.33	Low
	TRUE	Low	AQNEDIAQK	1xDeamidated [Q8]	1	1	1	CON_00220327.3	0	1017.48	0.33	Low
	TRUE	Low	GENALKDAK		1	1	1	CON_00220327.3	1	945.5	0.32	Low
	TRUE	Low	NSKIEISELNR	1xDeamidated [N1]	1	1	1	CON_00220327.3	1	1303.69	0.29	Low
	TRUE	Low	AQNEDIAQKSKAEAESLYQSK	2xDeamidated [Q2; N/Q]	1	1	2	CON_00220327.3	2	2340.12	0.28	Low
	TRUE	Low	VDQLKSDQSR		1	1	1	CON_00220327.3	1	1175.6	0.27	Low
	TRUE	Low	SGGGFSSGSAGIINYQR	2xDeamidated [N14; Q16]	1	1	1	CON_00220327.3	0	1659.76	0.26	Low
	TRUE	Low	MSRQFSSRSGYR	1xDeamidated [Q4]; 1xOxidation [M1]	1	1	1	CON_00220327.3	2	1478.68	0.25	Low
	TRUE	Low	SEIDNVKKQISNLQQSISDAEQR		1	1	1	CON_00220327.3	2	2630.34	0.24	Low
	TRUE	Low	GSGGGSSGGSIGGRGSSSGGVK		1	1	1	CON_00220327.3	1	1751.83	0.24	Low
	TRUE	Low	NKLNDLEDALQQAKEDLAR	2xDeamidated [Q11; Q12]	1	1	1	CON_00220327.3	2	2186.09	0.24	Low
	TRUE	Low	QFSSRSGYRSGGGFSSGSAGIINYQR		1	1	1	CON_00220327.3	2	2726.3	0.23	Low
	TRUE	Low	LNDLEDALQQAK	3xDeamidated [N2; Q9; Q10]	1	1	1	CON_00220327.3	0	1360.65	0.23	Low
	TRUE	Low	KDVDGAYMTKVDLQAK	1xDeamidated [Q14]; 1xOxidation [M8]	1	1	1	CON_00220327.3	2	1798.89	0.23	Low
	TRUE	Low	VDQLKSDQSRLDSELK	1xDeamidated [Q3]	1	1	1	CON_00220327.3	2	1861.95	0.22	Low
	TRUE	Low	NMQDMVEDYRNK	2xDeamidated [N11; N/Q]	1	1	2	CON_00220327.3	1	1544.64	0.21	Low
	TRUE	Low	EQIKSLNNQFASFIDKVR	3xDeamidated [Q2; N8; Q9]	2	2	1	IPI:CON_00714876.1; CON_00220327.3	2	2140.09	0.16	Low
	TRUE	Low	FLEQQNQVLQTKWELLQQVDTSTR	2xDeamidated [Q4; Q5]	1	1	1	CON_00220327.3	1	2934.48	0.16	Low
	TRUE	Low	THNLEPYFESFINNLRRR		1	1	1	CON_00220327.3	2	2306.18	0.15	Low
	TRUE	Low	KQISNLQQSISDAEQRGENALK	2xDeamidated [Q7; Q]	1	1	2	CON_00220327.3	2	2459.24	0.15	Low
	TRUE	Low	FSSCGGGGGSFGAGGGFGSR		1	1	1	CON_00220327.3	0	1708.71	0.14	Low
	TRUE	Low	NMQDMVEDYRNKYEDEINK	1xDeamidated [Q/N]; 1xOxidation [M]	1	1	6	CON_00220327.3	2	2451.04	0.12	Low
	TRUE	Low	WELLQQVDTSTRTHNLEPYFESFINNLRR	2xDeamidated [N25; N26]	1	1	1	CON_00220327.3	2	3608.78	0.11	Low
	TRUE	Low	EQIKSLNNQFASFIDK	3xDeamidated [Q2; N8; N/Q]	2	2	2	IPI:CON_00714876.1; CON_00220327.3	1	1884.92	0.1	Low
	TRUE	Low	NKLNDLEDALQQAK	2xDeamidated [N/Q]	1	1	3	CON_00220327.3	1	1601.8	0.09	Low
	TRUE	Low	YEDEINKR	1xDeamidated [N6]	20	21	1	CON_IPI00748057.2; CON_IPI00290857.2; CON_00622240.4; CON_IPI00376379.3; CON_IPI00005859.3; CON_IPI00293665.9; CON_00300725.7; IPI:CON_00714876.1; CON_00131368.3; CON_00221797.1; CON_00124499.2; IPI:CON_00697851.1; CON_00299145.9; CON_00021304.1; CON_00462140.1; CON_IPI00008359.1; CON_00220327.3; CON_IPI00554648.3; CON_00139301.3; CON_00009867.3	1	1067.5	0.08	Low
	TRUE	Low	LRSEIDNVK		3	3	1	IPI:CON_00697851.1; CON_00220327.3; CON_00139301.3	1	1073.59	0.07	Low
	TRUE	Low	LDSELKNMQDMVEDYR	2xDeamidated [N7; Q9]	1	1	1	CON_00220327.3	1	1987.86	0.05	Low
	TRUE	Low	VIQRLRSEIDNVK	1xDeamidated [N/Q]	1	1	2	CON_00220327.3	2	1570.89	0.03	Low
	TRUE	Low	NKYEDEINK	2xDeamidated [N1; N8]	14	15	1	CON_IPI00748057.2; CON_IPI00293665.9; CON_00300725.7; CON_IPI00241841.9; CON_00124499.2; IPI:CON_00697851.1; CON_00299145.9; CON_IPI00017870.1; CON_00462140.1; CON_00220327.3; CON_IPI00787323.2; CON_IPI00554648.3; CON_00139301.3; CON_00009867.3	1	1154.52	0.03	Low
TRUE	Master Protein	CON_00019359.3	Keratin, type I cytoskeletal 9	87.9615	74	225	73	1	623	62.1	5.3	104.12	74
	Checked	Confidence	Sequence	Modifications	# Protein Groups	# Proteins	# PSMs	Master Protein Accessions	# Missed Cleavages	Theo. MH+ [Da]	XCorr Sequest HT	Confidence Sequest HT
	TRUE	High	NRKDIENQYETQITQIEHEVSSSGQEVQSSAK		1	1	2	CON_00019359.3	2	3662.75	6.63	High
	TRUE	High	GGSGGSYGGGGSGGGYGGGSGSR		1	1	1	CON_00019359.3	0	1791.73	5.41	High
	TRUE	High	HGVQELEIELQSQLSK		1	1	5	CON_00019359.3	0	1837.97	5.33	High
	TRUE	High	MRLEKEIETYHNLLEGGQEDFESSGAGK	1xOxidation [M1]	1	1	2	CON_00019359.3	2	3183.49	5.18	High
	TRUE	High	SGGGGGGGLGSGGSIR		1	1	1	CON_00019359.3	0	1232.6	4.86	High
	TRUE	High	GSRGGSGGSYGGGGSGGGYGGGSGSR		1	1	1	CON_00019359.3	1	2091.88	4.74	High
	TRUE	High	EIETYHNLLEGGQEDFESSGAGK		1	1	2	CON_00019359.3	0	2510.13	4.33	High
	TRUE	High	DIENQYETQITQIEHEVSSSGQEVQSSAKEVTQLR		1	1	1	CON_00019359.3	1	3990.92	4.23	High
	TRUE	High	NYSPYYNTIDDLKDQIVDLTVGNNK		1	1	1	CON_00019359.3	1	2902.41	3.74	High
	TRUE	High	NHKEEMSQLTGQNSGDVNVEINVAPGKDLTK	1xDeamidated [N18]; 1xOxidation [M6]	1	1	1	CON_00019359.3	2	3369.62	3.18	High
	TRUE	High	IGLGGRGGSGGSYGR		1	1	2	CON_00019359.3	1	1350.69	3.13	High
	TRUE	High	TLNDMRQEYEQLIAK		1	1	3	CON_00019359.3	1	1851.93	3.07	High
	TRUE	High	MRLEKEIETYHNLLEGGQEDFESSGAGK	1xDeamidated [Q/N]	1	1	2	CON_00019359.3	2	3168.48	3.07	High
	TRUE	High	QGVDADINGLR	1xDeamidated [N8]	1	1	1	CON_00019359.3	0	1158.57	3.03	High
	TRUE	High	IKFEMEQNLR		1	1	2	CON_00019359.3	1	1307.68	2.99	High
	TRUE	High	STMQELNSR		1	1	1	CON_00019359.3	0	1065.5	2.77	High
	TRUE	High	GGSGGSHGGGSGFGGESGGSYGGGEEASGSGGGYGGGSGKSSHS		1	1	1	CON_00019359.3	1	3621.44	2.6	High
	TRUE	High	TLLDIDNTR		1	1	1	CON_00019359.3	0	1060.56	2.58	High
	TRUE	High	STMQELNSR	1xOxidation [M3]	1	1	1	CON_00019359.3	0	1081.49	2.46	High
	TRUE	High	FSSSSGYGGGSSR		1	1	1	CON_00019359.3	0	1235.53	2.38	High
	TRUE	High	MTLDDFR	1xOxidation [M1]	1	1	2	CON_00019359.3	0	913.408	2.36	High
	TRUE	High	GGGGSFGYSYGGGSGGGFSASSLGGGFGGGSR		1	1	2	CON_00019359.3	0	2705.16	2.3	High
	TRUE	High	TLNDMRQEYEQLIAK	1xOxidation [M5]	1	1	4	CON_00019359.3	1	1867.92	2.22	High
	TRUE	High	STMQELNSR	1xDeamidated [N7]	1	1	1	CON_00019359.3	0	1066.48	2.15	High
	TRUE	High	MTLDDFR		1	1	1	CON_00019359.3	0	897.413	2.08	High
	TRUE	High	IKFEMEQNLR	1xOxidation [M5]	1	1	1	CON_00019359.3	1	1323.67	1.92	High
	TRUE	Medium	NYSPYYNTIDDLKDQIVDLTVGNNKTLLDIDNTR		1	1	1	CON_00019359.3	2	3943.96	1.95	Medium
	TRUE	Medium	HGVQELEIELQSQLSKK	1xDeamidated [Q13]	1	1	1	CON_00019359.3	1	1967.04	1.66	Medium
	TRUE	Medium	FEMEQNLRQGVDADINGLRQVLDNLTMEK	2xDeamidated [Q5; Q9]; 1xOxidation [M27]	1	1	1	CON_00019359.3	2	3394.63	1.47	Medium
	TRUE	Medium	QEIECQNQEYSLLLSIKMRLEK	2xDeamidated [Q6; Q8]; 1xOxidation [M18]; 1xC29H38O4 [C5]	1	1	3	CON_00019359.3	2	3163.62	1.44	Medium
	TRUE	Medium	EVTQLR		1	1	1	CON_00019359.3	0	745.42	1.38	Medium
	TRUE	Medium	TLLDIDNTRMTLDDFRIK	1xOxidation [M10]	1	1	1	CON_00019359.3	2	2196.13	1.21	Medium
	TRUE	Medium	LASYLDKVQALEEANNDLENKIQDWYDK	1xDeamidated [Q/N]	1	1	3	CON_00019359.3	2	3326.61	1	Medium
	TRUE	Medium	QVLDNLTMEK		1	1	1	CON_00019359.3	0	1190.61	0.99	Medium
	TRUE	Low	QEIECQNQEYSLLLSIKMRLEK	2xDeamidated [Q1; Q6]; 1xOxidation [M18]	1	1	1	CON_00019359.3	2	2713.34	1.01	Low
	TRUE	Low	NRKDIENQYETQITQIEHEVSSSGQEVQSSAK	1xDeamidated [Q]	1	1	2	CON_00019359.3	2	3663.74	0.98	Low
	TRUE	Low	QEIECQNQEYSLLLSIKMRLEK	1xDeamidated [Q8]; 1xOxidation [M18]; 1xC29H38O4 [C5]	1	1	1	CON_00019359.3	2	3162.63	0.96	Low
	TRUE	Low	MTLDDFRIKFEMEQNLR	1xDeamidated [Q/N]; 2xOxidation [M1; M12]	1	1	3	CON_00019359.3	2	2219.05	0.89	Low
	TRUE	Low	MTLDDFRIKFEMEQNLR	1xOxidation [M12]	1	1	1	CON_00019359.3	2	2202.07	0.86	Low
	TRUE	Low	GGSGGSYGGGSGSGGGSGGGYGGGSGGGHSGGSGGGHSGGSGGNYGGGSGSGGGSGGGYGGGSGSR		1	1	1	CON_00019359.3	0	4972.94	0.83	Low
	TRUE	Low	EVTQLRHGVQELEIELQSQLSKK	1xDeamidated [Q19]	1	1	1	CON_00019359.3	2	2693.45	0.8	Low
	TRUE	Low	SLEDTKNRYCGQLQMIQEQISNLEAQITDVR	1xC29H38O4 [C10]	1	1	1	CON_00019359.3	2	4074.06	0.79	Low
	TRUE	Low	NRYCGQLQMIQEQISNLEAQITDVR	1xDeamidated [Q/N]; 1xOxidation [M9]; 1xC29H38O4 [C4]	1	1	3	CON_00019359.3	1	3417.71	0.79	Low
	TRUE	Low	QGVDADINGLRQVLDNLTMEK	1xOxidation [M19]	1	1	1	CON_00019359.3	1	2345.18	0.75	Low
	TRUE	Low	KNHKEEMSQLTGQNSGDVNVEINVAPGK		1	1	2	CON_00019359.3	2	3023.49	0.73	Low
	TRUE	Low	GPAAIQKNYSPYYNTIDDLK	2xDeamidated [N14; N/Q]	1	1	4	CON_00019359.3	1	2273.1	0.69	Low
	TRUE	Low	QFSSSYLSRSGGGGGGGLGSGGSIR		1	1	3	CON_00019359.3	1	2288.1	0.66	Low
	TRUE	Low	QVLDNLTMEKSDLEMQYETLQEELMALK	2xDeamidated [Q1; N5]; 2xOxidation [M8; M15]	1	1	1	CON_00019359.3	1	3376.57	0.65	Low
	TRUE	Low	MTLDDFRIKFEMEQNLR	2xOxidation [M1; M12]	1	1	2	CON_00019359.3	2	2218.06	0.64	Low
	TRUE	Low	NRYCGQLQMIQEQISNLEAQITDVR	2xDeamidated [Q/N]; 1xOxidation [M9]; 1xC29H38O4 [C4]	1	1	3	CON_00019359.3	1	3418.69	0.62	Low
	TRUE	Low	GGSGGSHGGGSGFGGESGGSYGGGEEASGSGGGYGGGSGK		1	1	3	CON_00019359.3	0	3223.28	0.61	Low
	TRUE	Low	DQIVDLTVGNNKTLLDIDNTRMTLDDFR	1xOxidation [M22]	1	1	2	CON_00019359.3	2	3251.62	0.61	Low
	TRUE	Low	TLLDIDNTRMTLDDFR	1xDeamidated [N7]	1	1	2	CON_00019359.3	1	1939.94	0.6	Low
	TRUE	Low	NYSPYYNTIDDLK	1xDeamidated [N1]	1	1	1	CON_00019359.3	0	1606.73	0.59	Low
	TRUE	Low	EVTQLRHGVQELEIELQSQLSKK		1	1	2	CON_00019359.3	2	2692.46	0.58	Low
	TRUE	Low	TLNDMRQEYEQLIAK	1xDeamidated [Q]	1	1	2	CON_00019359.3	1	1852.91	0.56	Low
	TRUE	Low	DQIVDLTVGNNKTLLDIDNTRMTLDDFR	1xDeamidated [N/Q]; 1xOxidation [M22]	1	1	2	CON_00019359.3	2	3252.61	0.56	Low
	TRUE	Low	GPAAIQKNYSPYYNTIDDLKDQIVDLTVGNNK	2xDeamidated [Q/N]	1	1	2	CON_00019359.3	2	3569.76	0.55	Low
	TRUE	Low	FEMEQNLRQGVDADINGLRQVLDNLTMEK	2xOxidation [M3; M27]	1	1	2	CON_00019359.3	2	3408.65	0.53	Low
	TRUE	Low	KNHKEEMSQLTGQNSGDVNVEINVAPGK	1xDeamidated [N]; 1xOxidation [M7]	1	1	3	CON_00019359.3	2	3040.46	0.53	Low
	TRUE	Low	KNHKEEMSQLTGQNSGDVNVEINVAPGK	2xDeamidated [N19; N23]; 1xOxidation [M7]	1	1	1	CON_00019359.3	2	3041.45	0.53	Low
	TRUE	Low	FEMEQNLRQGVDADINGLRQVLDNLTMEK	3xDeamidated [Q5; Q9; Q20]	1	1	1	CON_00019359.3	2	3379.61	0.52	Low
	TRUE	Low	KNHKEEMSQLTGQNSGDVNVEINVAPGK	3xDeamidated [N2; N14; N19]; 1xOxidation [M7]	1	1	1	CON_00019359.3	2	3042.43	0.5	Low
	TRUE	Low	TLLDIDNTRMTLDDFRIK	1xDeamidated [N7]; 1xOxidation [M10]	1	1	1	CON_00019359.3	2	2197.12	0.5	Low
	TRUE	Low	EEMSQLTGQNSGDVNVEINVAPGKDLTKTLNDMR	2xDeamidated [N19; N31]	1	1	1	CON_00019359.3	2	3705.76	0.5	Low
	TRUE	Low	TLNDMRQEYEQLIAK	3xDeamidated [N3; Q7; Q11]	1	1	1	CON_00019359.3	1	1854.88	0.46	Low
	TRUE	Low	KAALEKSLEDTK		1	1	1	CON_00019359.3	2	1332.74	0.45	Low
	TRUE	Low	DQIVDLTVGNNK	2xDeamidated [N10; N11]	1	1	1	CON_00019359.3	0	1317.65	0.44	Low
	TRUE	Low	STMQELNSRLASYLDK	2xDeamidated [Q4; N7]; 1xOxidation [M3]	1	1	2	CON_00019359.3	1	1873.88	0.42	Low
	TRUE	Low	DQIVDLTVGNNKTLLDIDNTRMTLDDFR		1	1	1	CON_00019359.3	2	3235.63	0.42	Low
	TRUE	Low	SGGGGGGGLGSGGSIRSSYSR		1	1	1	CON_00019359.3	1	1812.86	0.42	Low
	TRUE	Low	DLTKTLNDMRQEYEQLIAK	2xDeamidated [Q11; Q15]; 1xOxidation [M9]	1	1	1	CON_00019359.3	2	2327.14	0.41	Low
	TRUE	Low	TLNDMRQEYEQLIAKNR	2xDeamidated [N/Q]; 1xOxidation [M5]	1	1	7	CON_00019359.3	2	2140.03	0.41	Low
	TRUE	Low	HGVQELEIELQSQLSK	3xDeamidated [Q4; Q11; Q13]	1	1	1	CON_00019359.3	0	1840.92	0.39	Low
	TRUE	Low	KGPAAIQKNYSPYYNTIDDLK	1xDeamidated [Q/N]	1	1	8	CON_00019359.3	2	2400.21	0.38	Low
	TRUE	Low	TLLDIDNTRMTLDDFRIK		1	1	1	CON_00019359.3	2	2180.14	0.37	Low
	TRUE	Low	EIETYHNLLEGGQEDFESSGAGKIGLGGR	1xDeamidated [N/Q]	1	1	2	CON_00019359.3	1	3064.45	0.36	Low
	TRUE	Low	QVLDNLTMEKSDLEMQYETLQEELMALK	1xDeamidated [Q16]; 1xOxidation [M15]	1	1	1	CON_00019359.3	1	3359.59	0.34	Low
	TRUE	Low	MTLDDFRIKFEMEQNLR	2xDeamidated [Q14; N15]; 1xOxidation [M12]	1	1	1	CON_00019359.3	2	2204.04	0.34	Low
	TRUE	Low	EIETYHNLLEGGQEDFESSGAGKIGLGGRGGSGGSYGR		1	1	1	CON_00019359.3	2	3841.8	0.33	Low
	TRUE	Low	MTLDDFRIKFEMEQNLR	2xDeamidated [Q14; N15]	1	1	1	CON_00019359.3	2	2188.04	0.33	Low
	TRUE	Low	KGPAAIQKNYSPYYNTIDDLK	3xDeamidated [Q7; N9; N15]	1	1	2	CON_00019359.3	2	2402.18	0.32	Low
	TRUE	Low	NRYCGQLQMIQEQISNLEAQITDVR	1xC29H38O4 [C4]	1	1	1	CON_00019359.3	1	3400.73	0.31	Low
	TRUE	Low	DQIVDLTVGNNKTLLDIDNTR	3xDeamidated [N10; N11; N19]	1	1	1	CON_00019359.3	1	2360.18	0.29	Low
	TRUE	Low	QEYEQLIAKNRK	2xDeamidated [Q1; N10]	1	1	1	CON_00019359.3	2	1521.79	0.29	Low
	TRUE	Low	QGVDADINGLRQVLDNLTMEKSDLEMQYETLQEELMALK	2xDeamidated [Q27; Q32]; 1xOxidation [M]	1	1	2	CON_00019359.3	2	4499.15	0.28	Low
	TRUE	Low	QEYEQLIAKNRK	3xDeamidated [Q1; Q5; N10]	1	1	1	CON_00019359.3	2	1522.77	0.28	Low
	TRUE	Low	NRYCGQLQMIQEQISNLEAQITDVR		1	1	1	CON_00019359.3	1	2950.45	0.27	Low
	TRUE	Low	FEMEQNLRQGVDADINGLR		1	1	1	CON_00019359.3	1	2205.07	0.27	Low
	TRUE	Low	NRYCGQLQMIQEQISNLEAQITDVR	1xDeamidated [N16]; 1xOxidation [M9]	1	1	1	CON_00019359.3	1	2967.43	0.26	Low
	TRUE	Low	FEMEQNLR	1xOxidation [M3]	1	1	2	CON_00019359.3	0	1082.49	0.25	Low
	TRUE	Low	VQALEEANNDLENKIQDWYDK	1xDeamidated [N/Q]	1	1	2	CON_00019359.3	1	2536.18	0.25	Low
	TRUE	Low	QVLDNLTMEKSDLEMQYETLQEELMALKK	3xDeamidated [Q1; Q16; N/Q]	1	1	2	CON_00019359.3	2	3473.66	0.24	Low
	TRUE	Low	GPAAIQKNYSPYYNTIDDLKDQIVDLTVGNNK	1xDeamidated [N/Q]	1	1	3	CON_00019359.3	2	3568.78	0.24	Low
	TRUE	Low	TLNDMRQEYEQLIAK	2xDeamidated [Q7; Q/N]; 1xOxidation [M5]	1	1	2	CON_00019359.3	1	1869.89	0.24	Low
	TRUE	Low	SLEDTKNRYCGQLQMIQEQISNLEAQITDVR	1xDeamidated [N/Q]	1	1	9	CON_00019359.3	2	3624.76	0.24	Low
	TRUE	Low	KDIENQYETQITQIEHEVSSSGQEVQSSAK	2xDeamidated [Q/N]	1	1	3	CON_00019359.3	1	3394.58	0.23	Low
	TRUE	Low	EEMSQLTGQNSGDVNVEINVAPGKDLTK		1	1	1	CON_00019359.3	1	2973.45	0.22	Low
	TRUE	Low	QGVDADINGLRQVLDNLTMEKSDLEMQYETLQEELMALK	3xOxidation [M19; M26; M36]	1	1	1	CON_00019359.3	2	4529.17	0.22	Low
	TRUE	Low	LASYLDK		13	13	1	CON_00009865.2; CON_00384444.5; CON_00136056.1; CON_IPI00311493.5; CON_00225378.3; CON_IPI00015309.1; CON_00450768.7; CON_00019359.3; CON_00112947.1; CON_IPI00479145.2; CON_IPI00290077.1; CON_00217963.3; CON_IPI00230365.5	0	809.44	0.2	Low
	TRUE	Low	NHKEEMSQLTGQNSGDVNVEINVAPGK	1xDeamidated [Q/N]; 1xOxidation [M6]	1	1	5	CON_00019359.3	1	2912.37	0.2	Low
	TRUE	Low	MSCRQFSSSYLSR	1xAcetyl [N-Term]	1	1	1	CON_00019359.3	1	1593.71	0.18	Low
	TRUE	Low	SDLEMQYETLQEELMALKKNHK	2xDeamidated [Q6; Q11]	1	1	1	CON_00019359.3	2	2680.28	0.17	Low
	TRUE	Low	HGVQELEIELQSQLSKK	3xDeamidated [Q4; Q11; Q13]	1	1	1	CON_00019359.3	1	1969.01	0.17	Low
	TRUE	Low	GGSGGSYGGGSGSGGGSGGGYGGGSGGGHSGGSGGGHSGGSGGNYGGGSGSGGGSGGGYGGGSGSR	1xDeamidated [N44]	1	1	1	CON_00019359.3	0	4973.92	0.15	Low
	TRUE	Low	TLNDMRQEYEQLIAKNR	1xDeamidated [Q/N]	1	1	3	CON_00019359.3	2	2123.05	0.15	Low
	TRUE	Low	YCGQLQMIQEQISNLEAQITDVR	2xDeamidated [Q/N]; 1xOxidation [M7]	1	1	2	CON_00019359.3	0	2698.27	0.15	Low
	TRUE	Low	GGSGGSYGR		1	1	1	CON_00019359.3	0	797.354	0.14	Low
	TRUE	Low	IKFEMEQNLR	1xDeamidated [N/Q]	1	1	2	CON_00019359.3	1	1308.66	0.12	Low
	TRUE	Low	TLNDMRQEYEQLIAKNR	3xDeamidated [Q7; N16; N/Q]; 1xOxidation [M5]	1	1	2	CON_00019359.3	2	2141.02	0.12	Low
	TRUE	Low	FEMEQNLRQGVDADINGLRQVLDNLTMEK	2xDeamidated [N/Q]; 2xOxidation [M3; M27]	1	1	5	CON_00019359.3	2	3410.62	0.12	Low
	TRUE	Low	VQALEEANNDLENKIQDWYDK		1	1	1	CON_00019359.3	1	2535.2	0.12	Low
	TRUE	Low	MTLDDFRIKFEMEQNLR	2xDeamidated [Q14; N15]; 2xOxidation [M1; M12]	1	1	1	CON_00019359.3	2	2220.03	0.11	Low
	TRUE	Low	GPAAIQKNYSPYYNTIDDLKDQIVDLTVGNNK		1	1	1	CON_00019359.3	2	3567.8	0.11	Low
	TRUE	Low	QEYEQLIAKNR	1xDeamidated [Q/N]	1	1	2	CON_00019359.3	1	1392.71	0.09	Low
	TRUE	Low	KGPAAIQK		1	1	1	CON_00019359.3	1	812.499	0.09	Low
	TRUE	Low	AALEKSLEDTKNR		1	1	1	CON_00019359.3	2	1474.79	0.08	Low
	TRUE	Low	TLNDMRQEYEQLIAKNR	1xOxidation [M5]	1	1	1	CON_00019359.3	2	2138.07	0.07	Low
	TRUE	Low	MSCRQFSSSYLSRSGGGGGGGLGSGGSIR	1xDeamidated [Q5]; 1xAcetyl [N-Term]	1	1	1	CON_00019359.3	2	2808.28	0.07	Low
	TRUE	Low	SDLEMQYETLQEELMALKKNHK	3xDeamidated [Q6; Q11; N20]	1	1	1	CON_00019359.3	2	2681.27	0.06	Low
	TRUE	Low	DLTKTLNDMR	1xOxidation [M9]	1	1	1	CON_00019359.3	1	1222.61	0.05	Low
	TRUE	Low	VQALEEANNDLENKIQDWYDK	2xDeamidated [Q2; N/Q]	1	1	2	CON_00019359.3	1	2537.17	0.05	Low
	TRUE	Low	NHKEEMSQLTGQNSGDVNVEINVAPGK	3xDeamidated [N/Q]	1	1	4	CON_00019359.3	1	2898.34	0.04	Low
	TRUE	Low	STMQELNSRLASYLDKVQALEEANNDLENK	1xDeamidated [N/Q]	1	1	4	CON_00019359.3	2	3424.65	0.04	Low
	TRUE	Low	STMQELNSRLASYLDKVQALEEANNDLENK		1	1	1	CON_00019359.3	2	3423.67	0.03	Low
TRUE	Master Protein	CON_00021304.1	Keratin, type II cytoskeletal 2 epidermal	98.6047	87	213	69	1	645	65.8	8	88.75	87
	Checked	Confidence	Sequence	Modifications	# Protein Groups	# Proteins	# PSMs	Master Protein Accessions	# Missed Cleavages	Theo. MH+ [Da]	XCorr Sequest HT	Confidence Sequest HT
	TRUE	High	SKEEAEALYHSKYEELQVTVGR		1	1	2	CON_00021304.1	2	2566.28	6.88	High
	TRUE	High	NKLNDLEEALQQAKEDLAR		1	1	1	CON_00021304.1	2	2198.14	5.13	High
	TRUE	High	GGGFGGGSGFGGGSGFGGGSGFSGGGFGGGGFGGGR		1	1	2	CON_00021304.1	0	2831.19	4.57	High
	TRUE	High	HGGGGGGFGGGGFGSR		1	1	1	CON_00021304.1	0	1320.58	4.51	High
	TRUE	High	TLNNKFASFIDKVR		23	24	3	CON_IPI00847342.1; CON_IPI00290857.2; CON_00622240.4; IPI:CON_105456; CON_IPI00005859.3; CON_IPI00293665.9; CON_00300725.7; CON_IPI00241841.9; CON_00131368.3; CON_00221797.1; CON_00124499.2; IPI:CON_00697851.1; CON_00299145.9; CON_00420312.4; IPI:CON_130456; CON_00021304.1; CON_00462140.1; CON_IPI00008359.1; CON_IPI00306959.10; CON_IPI00406377.3; CON_IPI00554648.3; CON_00139301.3; CON_00009867.3	2	1652.91	4.51	High
	TRUE	High	GSSSGGGYSSGSSSYGSGGR		1	1	1	CON_00021304.1	0	1740.71	4.18	High
	TRUE	High	FLEQQNQVLQTK		7	7	1	CON_00468956.4; CON_00347110.2; CON_IPI00376379.3; IPI:CON_00714876.1; CON_00021304.1; CON_00462140.1; CON_00220327.3	0	1475.79	4.12	High
	TRUE	High	GFSSGSAVVSGGSR		2	2	1	CON_00622240.4; CON_00021304.1	0	1254.61	3.96	High
	TRUE	High	GGSGGGGSISGGGYGSGGGSGGR		1	1	3	CON_00021304.1	0	1741.75	3.81	High
	TRUE	High	GGSSSGGGYGSGGGGSSSVK		1	1	1	CON_00021304.1	0	1588.68	3.36	High
	TRUE	High	SISISVAGGGGGFGAAGGFGGR		1	1	1	CON_00021304.1	0	1838.91	3.09	High
	TRUE	High	GGSISGGGYGSGGGK		1	1	1	CON_00021304.1	0	1197.55	3.04	High
	TRUE	High	AAFGGSGGRGSSSGGGYSSGSSSYGSGGR		1	1	1	CON_00021304.1	1	2501.07	2.92	High
	TRUE	High	FASFIDKVR		31	32	1	CON_IPI00847342.1; CON_IPI00329306.3; CON_IPI00290857.2; CON_00622240.4; CON_IPI00174775.2; CON_00468956.4; IPI:CON_105456; CON_00347110.2; CON_IPI00376379.3; CON_IPI00005859.3; CON_IPI00293665.9; CON_00300725.7; CON_IPI00241841.9; CON_00131368.3; CON_00347096.2; CON_00221797.1; CON_00124499.2; IPI:CON_00697851.1; CON_00299145.9; CON_00420312.4; IPI:CON_130456; CON_00021304.1; CON_00462140.1; CON…	1	1082.6	2.64	High
	TRUE	High	AQYEEIAQR		6	7	1	CON_IPI00293665.9; CON_00300725.7; IPI:CON_00714876.1; CON_00299145.9; CON_00021304.1; CON_IPI00290078.5	0	1107.54	2.55	High
	TRUE	High	GFSSGSAVVSGGSRR		2	2	2	CON_00622240.4; CON_00021304.1	1	1410.71	2.48	High
	TRUE	High	AAFGGSGGR		1	1	1	CON_00021304.1	0	779.379	2.38	High
	TRUE	High	YLDGLTAER		1	1	2	CON_00021304.1	0	1037.53	2.02	High
	TRUE	High	VDPEIQNVK		2	2	1	CON_00622240.4; CON_00021304.1	0	1041.56	1.96	High
	TRUE	Medium	YGSGGGSKGGSISGGGYGSGGGKHSSGGGSR		1	1	2	CON_00021304.1	2	2616.18	2.52	Medium
	TRUE	Medium	LLRDYQELMNVK	1xDeamidated [Q6]	4	4	1	CON_IPI00290857.2; CON_IPI00241841.9; CON_00021304.1; CON_IPI00008359.1	1	1522.79	1.82	Medium
	TRUE	Medium	YGSGGGSKGGSISGGGYGSGGGK		1	1	5	CON_00021304.1	1	1890.86	1.78	Medium
	TRUE	Medium	HGDSLKEIKIEISELNR		1	1	1	CON_00021304.1	2	1981.07	1.78	Medium
	TRUE	Medium	LLRDYQELMNVK		4	4	1	CON_IPI00290857.2; CON_IPI00241841.9; CON_00021304.1; CON_IPI00008359.1	1	1521.81	1.23	Medium
	TRUE	Medium	FLEQQNQVLQTKWELLQQMNVGTRPINLEPIFQGYIDSLKR	2xDeamidated [Q/N]; 1xOxidation [M19]	1	1	3	CON_00021304.1	2	4933.56	1.21	Medium
	TRUE	Medium	VELQSK		1	1	1	CON_00021304.1	0	703.398	1	Medium
	TRUE	Medium	NKLNDLEEALQQAK	3xDeamidated [N4; Q11; Q12]	1	1	1	CON_00021304.1	1	1616.8	0.81	Medium
	TRUE	Low	LLRDYQELMNVKLALDVEIATYR		4	4	1	CON_IPI00290857.2; CON_IPI00241841.9; CON_00021304.1; CON_IPI00008359.1	2	2766.49	0.9	Low
	TRUE	Low	MSCQISCKSR	1xDeamidated [Q4]; 1xC29H38O4 [C3]; 1xAcetyl [N-Term]	1	1	1	CON_00021304.1	1	1635.78	0.89	Low
	TRUE	Low	VLYDAEISQIHQSVTDTNVILSMDNSRNLDLDSIIAEVK	2xDeamidated [Q9; Q12]; 1xOxidation [M23]	1	1	1	CON_00021304.1	1	4377.17	0.85	Low
	TRUE	Low	DARNKLNDLEEALQQAK	2xDeamidated [N4; N7]	1	1	2	CON_00021304.1	2	1957.98	0.85	Low
	TRUE	Low	LNDLEEALQQAKEDLAR	2xDeamidated [Q9; Q/N]	1	1	5	CON_00021304.1	1	1957.97	0.8	Low
	TRUE	Low	TAAENDFVTLKK		1	1	4	CON_00021304.1	1	1336.71	0.77	Low
	TRUE	Low	EDLARLLRDYQELMNVK	2xDeamidated [Q11; N15]; 1xOxidation [M14]	1	1	1	CON_00021304.1	2	2124.06	0.76	Low
	TRUE	Low	WELLQQMNVGTRPINLEPIFQGYIDSLKRYLDGLTAER	3xDeamidated [Q5; Q6; Q21]	1	1	1	CON_00021304.1	2	4480.29	0.75	Low
	TRUE	Low	VDPEIQNVKAQER	1xDeamidated [Q/N]	1	1	2	CON_00021304.1	1	1526.78	0.74	Low
	TRUE	Low	VDPEIQNVKAQER	2xDeamidated [Q6; Q11]	1	1	2	CON_00021304.1	1	1527.76	0.73	Low
	TRUE	Low	KDVDNAYMIKVELQSK	1xDeamidated [Q14]	1	1	1	CON_00021304.1	2	1881.96	0.69	Low
	TRUE	Low	YEELQVTVGR	1xDeamidated [Q5]	1	1	2	CON_00021304.1	0	1194.6	0.68	Low
	TRUE	Low	KDVDNAYMIKVELQSK		1	1	2	CON_00021304.1	2	1880.98	0.64	Low
	TRUE	Low	WELLQQMNVGTRPINLEPIFQGYIDSLKR		1	1	1	CON_00021304.1	1	3458.83	0.63	Low
	TRUE	Low	RTAAENDFVTLKK		1	1	1	CON_00021304.1	2	1492.81	0.61	Low
	TRUE	Low	KQCKNVQDAIADAEQR		1	1	4	CON_00021304.1	2	1816.9	0.6	Low
	TRUE	Low	VIQRLQGEIAHVK		1	1	2	CON_00021304.1	1	1490.88	0.59	Low
	TRUE	Low	KQCKNVQDAIADAEQR	3xDeamidated [Q2; Q7; N/Q]; 1xC29H38O4 [C3]	1	1	3	CON_00021304.1	2	2270.13	0.56	Low
	TRUE	Low	GEHALKDARNK	1xDeamidated [N10]	1	1	1	CON_00021304.1	2	1239.64	0.56	Low
	TRUE	Low	LNDLEEALQQAK	3xDeamidated [N2; Q9; Q10]	1	1	3	CON_00021304.1	0	1374.66	0.55	Low
	TRUE	Low	VRFLEQQNQVLQTK	1xDeamidated [Q/N]	7	7	4	CON_00468956.4; CON_00347110.2; CON_IPI00376379.3; IPI:CON_00714876.1; CON_00021304.1; CON_00462140.1; CON_00220327.3	1	1731.94	0.54	Low
	TRUE	Low	DYQELMNVKLALDVEIATYRK	1xDeamidated [N7]	4	4	1	CON_IPI00290857.2; CON_IPI00241841.9; CON_00021304.1; CON_IPI00008359.1	2	2513.3	0.54	Low
	TRUE	Low	FLEQQNQVLQTK	3xDeamidated [Q4; Q5; N/Q]	7	7	2	CON_00468956.4; CON_00347110.2; CON_IPI00376379.3; IPI:CON_00714876.1; CON_00021304.1; CON_00462140.1; CON_00220327.3	0	1478.74	0.53	Low
	TRUE	Low	EIKIEISELNR		1	1	1	CON_00021304.1	1	1343.75	0.53	Low
	TRUE	Low	TAAENDFVTLK		1	1	1	CON_00021304.1	0	1208.62	0.53	Low
	TRUE	Low	WELLQQMNVGTRPINLEPIFQGYIDSLKR	2xDeamidated [N/Q]	1	1	4	CON_00021304.1	1	3460.79	0.52	Low
	TRUE	Low	EIKIEISELNRVIQR	1xDeamidated [N/Q]	1	1	4	CON_00021304.1	2	1841.05	0.49	Low
	TRUE	Low	TLNNKFASFIDK	1xDeamidated [N]	24	25	7	CON_IPI00847342.1; CON_IPI00290857.2; CON_00622240.4; IPI:CON_105456; CON_IPI00005859.3; CON_IPI00293665.9; CON_00300725.7; CON_IPI00241841.9; CON_00131368.3; CON_00221797.1; CON_00124499.2; IPI:CON_00697851.1; CON_00299145.9; CON_00420312.4; IPI:CON_130456; CON_00021304.1; CON_IPI00017870.1; CON_00462140.1; CON_IPI00008359.1; CON_IPI00306959.10; CON_IPI00406377.3; CON_IPI00554648.3; CON_00139301…	1	1398.73	0.48	Low
	TRUE	Low	QSGSRGGSGGGGSISGGGYGSGGGSGGRYGSGGGSK		1	1	1	CON_00021304.1	2	2950.3	0.45	Low
	TRUE	Low	VLYDAEISQIHQSVTDTNVILSMDNSR	1xDeamidated [Q]	1	1	2	CON_00021304.1	0	3049.48	0.45	Low
	TRUE	Low	KQCKNVQDAIADAEQR	1xDeamidated [Q/N]; 1xC29H38O4 [C3]	1	1	6	CON_00021304.1	2	2268.16	0.45	Low
	TRUE	Low	KDVDNAYMIKVELQSK	1xOxidation [M8]	1	1	1	CON_00021304.1	2	1896.97	0.45	Low
	TRUE	Low	EEAEALYHSKYEELQVTVGR	1xDeamidated [Q15]	1	1	1	CON_00021304.1	1	2352.14	0.44	Low
	TRUE	Low	WELLQQMNVGTRPINLEPIFQGYIDSLK	2xDeamidated [Q6; Q21]	1	1	1	CON_00021304.1	0	3304.69	0.44	Low
	TRUE	Low	KYEDEINKR		5	5	1	CON_IPI00290857.2; CON_00622240.4; IPI:CON_00714876.1; CON_00021304.1; CON_IPI00008359.1	2	1194.61	0.43	Low
	TRUE	Low	FGGFGGPGGVGGLGGPGGFGPGGYPGGIHEVSVNQSLLQPLNVK	3xDeamidated [Q35; N42; Q/N]	1	1	2	CON_00021304.1	0	4095.02	0.43	Low
	TRUE	Low	EDLARLLRDYQELMNVK		1	1	1	CON_00021304.1	2	2106.1	0.43	Low
	TRUE	Low	VDPEIQNVKAQEREQIK		1	1	1	CON_00021304.1	2	2024.08	0.42	Low
	TRUE	Low	NKLNDLEEALQQAK	2xDeamidated [Q11; Q12]	1	1	1	CON_00021304.1	1	1615.82	0.41	Low
	TRUE	Low	LLEGEECRMSGDLSSNVTVSVTSSTISSNVASKAAFGGSGGR	1xDeamidated [N29]	1	1	1	CON_00021304.1	2	4148.97	0.4	Low
	TRUE	Low	WELLQQMNVGTRPINLEPIFQGYIDSLK	3xDeamidated [Q5; N15; Q/N]; 1xOxidation [M7]	1	1	2	CON_00021304.1	0	3321.67	0.38	Low
	TRUE	Low	EIKIEISELNRVIQR	2xDeamidated [N10; Q14]	1	1	2	CON_00021304.1	2	1842.03	0.37	Low
	TRUE	Low	SLVGLGGTK		1	1	1	CON_00021304.1	0	831.493	0.37	Low
	TRUE	Low	STSSFSCLSR	1xC29H38O4 [C7]	1	1	1	CON_00021304.1	0	1524.76	0.36	Low
	TRUE	Low	LQGEIAHVKK	1xDeamidated [Q2]	1	1	1	CON_00021304.1	1	1123.65	0.35	Low
	TRUE	Low	NLDLDSIIAEVKAQYEEIAQR		4	5	2	CON_IPI00293665.9; CON_00300725.7; CON_00299145.9; CON_00021304.1	1	2418.25	0.34	Low
	TRUE	Low	DVDNAYMIK		1	1	1	CON_00021304.1	0	1068.5	0.33	Low
	TRUE	Low	AQYEEIAQRSK	1xDeamidated [Q]	3	3	2	IPI:CON_00714876.1; CON_00021304.1; CON_IPI00290078.5	1	1323.65	0.33	Low
	TRUE	Low	IEISELNRVIQRLQGEIAHVK	2xDeamidated [N7; Q11]	1	1	1	CON_00021304.1	2	2447.36	0.33	Low
	TRUE	Low	DVDNAYMIKVELQSK	1xDeamidated [N/Q]; 1xOxidation [M7]	1	1	6	CON_00021304.1	1	1769.86	0.32	Low
	TRUE	Low	RSTSSFSCLSRHGGGGGGFGGGGFGSR		1	1	1	CON_00021304.1	2	2532.15	0.32	Low
	TRUE	Low	FLEQQNQVLQTKWELLQQMNVGTRPINLEPIFQGYIDSLKR	1xOxidation [M19]	1	1	1	CON_00021304.1	2	4931.59	0.32	Low
	TRUE	Low	VDLLNQEIEFLKVLYDAEISQIHQSVTDTNVILSMDNSR	2xDeamidated [N/Q]	1	1	5	CON_00021304.1	1	4492.24	0.29	Low
	TRUE	Low	LQGEIAHVKKQCK	1xDeamidated [Q11]	1	1	1	CON_00021304.1	2	1482.81	0.28	Low
	TRUE	Low	EIKIEISELNRVIQR		1	1	1	CON_00021304.1	2	1840.07	0.28	Low
	TRUE	Low	QSGSRGGSGGGGSISGGGYGSGGGSGGR		1	1	1	CON_00021304.1	1	2256.99	0.27	Low
	TRUE	Low	KQCKNVQDAIADAEQR	2xDeamidated [Q/N]	1	1	3	CON_00021304.1	2	1818.87	0.27	Low
	TRUE	Low	TAAENDFVTLKKDVDNAYMIK	1xDeamidated [N5]; 1xOxidation [M19]	1	1	1	CON_00021304.1	2	2403.17	0.26	Low
	TRUE	Low	QCKNVQDAIADAEQR	2xDeamidated [Q1; Q6]; 1xC29H38O4 [C2]	1	1	1	CON_00021304.1	1	2141.05	0.26	Low
	TRUE	Low	AQEREQIKTLNNK	1xDeamidated [Q/N]	3	3	3	CON_IPI00290857.2; CON_00021304.1; CON_IPI00008359.1	2	1572.83	0.25	Low
	TRUE	Low	DVDNAYMIKVELQSK	2xDeamidated [N4; Q13]	1	1	1	CON_00021304.1	1	1754.85	0.25	Low
	TRUE	Low	KLLEGEECRMSGDLSSNVTVSVTSSTISSNVASK	2xDeamidated [N17; N30]; 1xC29H38O4 [C8]	1	1	1	CON_00021304.1	2	3967.96	0.24	Low
	TRUE	Low	KDVDNAYMIKVELQSK	2xDeamidated [N5; Q14]	1	1	1	CON_00021304.1	2	1882.95	0.24	Low
	TRUE	Low	MSCQISCK	2xC29H38O4 [C3; C7]	1	1	1	CON_00021304.1	0	1799.93	0.24	Low
	TRUE	Low	NKLNDLEEALQQAK	1xDeamidated [Q11]	1	1	1	CON_00021304.1	1	1614.83	0.24	Low
	TRUE	Low	KDVDNAYMIK	1xDeamidated [N5]	1	1	1	CON_00021304.1	1	1197.58	0.23	Low
	TRUE	Low	FLEQQNQVLQTKWELLQQMNVGTRPINLEPIFQGYIDSLKR	3xDeamidated [N/Q]; 1xOxidation [M19]	1	1	8	CON_00021304.1	2	4934.54	0.23	Low
	TRUE	Low	GSSGEAFGSSVTFSFR		1	1	1	CON_00021304.1	0	1622.74	0.21	Low
	TRUE	Low	NVQDAIADAEQRGEHALK	1xDeamidated [Q11]	1	1	1	CON_00021304.1	1	1965.96	0.21	Low
	TRUE	Low	MSCQISCKSRGR	1xC29H38O4 [C3]	1	1	1	CON_00021304.1	2	1805.91	0.2	Low
	TRUE	Low	QCKNVQDAIADAEQR	1xDeamidated [Q14]	1	1	2	CON_00021304.1	1	1689.79	0.2	Low
	TRUE	Low	KYEDEINKR	1xDeamidated [N7]	5	5	1	CON_IPI00290857.2; CON_00622240.4; IPI:CON_00714876.1; CON_00021304.1; CON_IPI00008359.1	2	1195.6	0.2	Low
	TRUE	Low	NVQDAIADAEQRGEHALK	3xDeamidated [N1; Q3; Q11]	1	1	1	CON_00021304.1	1	1967.93	0.19	Low
	TRUE	Low	AQEREQIKTLNNK	2xDeamidated [Q2; N12]	3	3	1	CON_IPI00290857.2; CON_00021304.1; CON_IPI00008359.1	2	1573.82	0.18	Low
	TRUE	Low	DVDNAYMIKVELQSKVDLLNQEIEFLK	2xDeamidated [N/Q]	1	1	3	CON_00021304.1	2	3196.63	0.18	Low
	TRUE	Low	MSCQISCKSR	1xDeamidated [Q4]; 1xOxidation [M1]	1	1	2	CON_00021304.1	1	1159.49	0.18	Low
	TRUE	Low	KQCKNVQDAIADAEQR	1xDeamidated [Q/N]	1	1	3	CON_00021304.1	2	1817.88	0.17	Low
	TRUE	Low	STSSFSCLSRHGGGGGGFGGGGFGSR		1	1	1	CON_00021304.1	1	2376.05	0.16	Low
	TRUE	Low	LLRDYQELMNVK	2xDeamidated [Q6; N10]; 1xOxidation [M9]	4	4	1	CON_IPI00290857.2; CON_IPI00241841.9; CON_00021304.1; CON_IPI00008359.1	1	1539.77	0.16	Low
	TRUE	Low	TAAENDFVTLK	1xDeamidated [N5]	1	1	1	CON_00021304.1	0	1209.6	0.16	Low
	TRUE	Low	STSSFSCLSR		1	1	1	CON_00021304.1	0	1074.49	0.15	Low
	TRUE	Low	TLNNKFASFIDK	2xDeamidated [N3; N4]	24	25	2	CON_IPI00847342.1; CON_IPI00290857.2; CON_00622240.4; IPI:CON_105456; CON_IPI00005859.3; CON_IPI00293665.9; CON_00300725.7; CON_IPI00241841.9; CON_00131368.3; CON_00221797.1; CON_00124499.2; IPI:CON_00697851.1; CON_00299145.9; CON_00420312.4; IPI:CON_130456; CON_00021304.1; CON_IPI00017870.1; CON_00462140.1; CON_IPI00008359.1; CON_IPI00306959.10; CON_IPI00406377.3; CON_IPI00554648.3; CON_00139301…	1	1399.71	0.15	Low
	TRUE	Low	TLNNKFASFIDKVR	2xDeamidated [N3; N4]	23	24	1	CON_IPI00847342.1; CON_IPI00290857.2; CON_00622240.4; IPI:CON_105456; CON_IPI00005859.3; CON_IPI00293665.9; CON_00300725.7; CON_IPI00241841.9; CON_00131368.3; CON_00221797.1; CON_00124499.2; IPI:CON_00697851.1; CON_00299145.9; CON_00420312.4; IPI:CON_130456; CON_00021304.1; CON_00462140.1; CON_IPI00008359.1; CON_IPI00306959.10; CON_IPI00406377.3; CON_IPI00554648.3; CON_00139301.3; CON_00009867.3	2	1654.88	0.15	Low
	TRUE	Low	VIQRLQGEIAHVKK		1	1	1	CON_00021304.1	2	1618.98	0.15	Low
	TRUE	Low	KQCKNVQDAIADAEQR	3xDeamidated [Q2; Q7; Q/N]	1	1	2	CON_00021304.1	2	1819.85	0.14	Low
	TRUE	Low	YLDGLTAERTSQNSELNNMQDLVEDYK	1xOxidation [M19]	1	1	1	CON_00021304.1	1	3162.45	0.12	Low
	TRUE	Low	VELQSKVDLLNQEIEFLK	2xDeamidated [Q4; Q/N]	1	1	2	CON_00021304.1	1	2147.15	0.12	Low
	TRUE	Low	LLRDYQELMNVK	1xOxidation [M9]	4	4	1	CON_IPI00290857.2; CON_IPI00241841.9; CON_00021304.1; CON_IPI00008359.1	1	1537.8	0.12	Low
	TRUE	Low	AQEREQIK	1xDeamidated [Q6]	10	10	1	CON_IPI00329306.3; CON_IPI00290857.2; CON_IPI00174775.2; CON_00468956.4; CON_00347110.2; CON_00347096.2; CON_00021304.1; CON_IPI00008359.1; CON_IPI00061200.4; CON_IPI00103481.3	1	1002.52	0.1	Low
	TRUE	Low	MSCQISCKSRGR	1xDeamidated [Q4]; 1xAcetyl [N-Term]	1	1	1	CON_00021304.1	2	1398.63	0.09	Low
	TRUE	Low	YEDEINKR	1xDeamidated [N6]	20	21	1	CON_IPI00748057.2; CON_IPI00290857.2; CON_00622240.4; CON_IPI00376379.3; CON_IPI00005859.3; CON_IPI00293665.9; CON_00300725.7; IPI:CON_00714876.1; CON_00131368.3; CON_00221797.1; CON_00124499.2; IPI:CON_00697851.1; CON_00299145.9; CON_00021304.1; CON_00462140.1; CON_IPI00008359.1; CON_00220327.3; CON_IPI00554648.3; CON_00139301.3; CON_00009867.3	1	1067.5	0.08	Low
	TRUE	Low	FLEQQNQVLQTKWELLQQMNVGTRPINLEPIFQGYIDSLK	3xDeamidated [Q5; Q7; Q]; 1xOxidation [M19]	1	1	2	CON_00021304.1	1	4778.44	0.03	Low
	TRUE	Low	LQGEIAHVKKQCK	2xDeamidated [Q2; Q11]; 1xC29H38O4 [C12]	1	1	1	CON_00021304.1	2	1934.07	0.03	Low
	TRUE	Low	YEDEINKRTAAENDFVTLK	2xDeamidated [N6; N13]	1	1	1	CON_00021304.1	2	2258.08	0.03	Low
TRUE	Master Protein	CON_00009865.2	Keratin, type I cytoskeletal 10	55.4806	46	145	32	1	593	59.5	5.21	65.89	46
	Checked	Confidence	Sequence	Modifications	# Protein Groups	# Proteins	# PSMs	Master Protein Accessions	# Missed Cleavages	Theo. MH+ [Da]	XCorr Sequest HT	Confidence Sequest HT
	TRUE	High	GSLGGGFSSGGFSGGSFSR		1	1	1	CON_00009865.2	0	1707.77	4.48	High
	TRUE	High	SQYEQLAEQNRK		1	1	2	CON_00009865.2	1	1493.73	3.76	High
	TRUE	High	SQYEQLAEQNRKDAEAWFNEK		1	1	1	CON_00009865.2	2	2584.21	3.67	High
	TRUE	High	LKYENEVALR		1	1	3	CON_00009865.2	1	1234.68	3.61	High
	TRUE	High	VTMQNLNDRLASYLDKVR		4	4	3	CON_00009865.2; CON_00384444.5; CON_00225378.3; CON_00217963.3	2	2136.12	3.54	High
	TRUE	High	QSVEADINGLRR	1xDeamidated [N8]	5	5	3	CON_00009866.6; CON_00009865.2; CON_00136056.1; CON_IPI00873598.1; CON_00798492.2	1	1358.7	3.48	High
	TRUE	High	IRLENEIQTYR		1	1	1	CON_00009865.2	1	1434.77	2.78	High
	TRUE	High	QSVEADINGLRR		5	5	3	CON_00009866.6; CON_00009865.2; CON_00136056.1; CON_IPI00873598.1; CON_00798492.2	1	1357.72	2.62	High
	TRUE	High	SLLEGEGSSGGGGR		1	1	3	CON_00009865.2	0	1262.6	2.59	High
	TRUE	High	ALEESNYELEGK		2	2	6	CON_00009865.2; CON_00798492.2	0	1381.65	2.56	High
	TRUE	High	SQYEQLAEQNR		1	1	1	CON_00009865.2	0	1365.64	2.54	High
	TRUE	High	DAEAWFNEK		5	5	1	CON_00009865.2; CON_IPI00328103.3; CON_IPI00418663.3; IPI:CON_00703407.2; CON_IPI00375911.2	0	1109.49	2.4	High
	TRUE	High	LASYLDKVR		11	11	1	CON_00009865.2; CON_00384444.5; CON_00136056.1; CON_00225378.3; CON_IPI00015309.1; CON_00450768.7; CON_00112947.1; CON_IPI00479145.2; CON_IPI00290077.1; CON_00217963.3; CON_IPI00230365.5	1	1064.61	2.38	High
	TRUE	High	YENEVALR		1	1	1	CON_00009865.2	0	993.5	2.2	High
	TRUE	High	VLDELTLTK		1	1	1	CON_00009865.2	0	1031.6	2.17	High
	TRUE	Medium	NVSTGDVNVEMNAAPGVDLTQLLNNMR	1xOxidation [M]	1	1	3	CON_00009865.2	0	2888.39	2.27	Medium
	TRUE	Medium	VTMQNLNDRLASYLDKVR	1xOxidation [M3]	4	4	1	CON_00009865.2; CON_00384444.5; CON_00225378.3; CON_00217963.3	2	2152.12	1.96	Medium
	TRUE	Medium	ALEESNYELEGKIKEWYEK		2	2	1	CON_00009865.2; CON_00798492.2	2	2358.15	1.84	Medium
	TRUE	Medium	IKEWYEK		2	2	1	CON_00009865.2; CON_00798492.2	1	995.52	1.8	Medium
	TRUE	Medium	SEITELRR		2	2	1	CON_00009865.2; CON_00798492.2	1	1003.55	1.74	Medium
	TRUE	Medium	YCVQLSQIQAQISALEEQLQQIR	2xDeamidated [Q18; Q20]; 1xC29H38O4 [C2]	1	1	1	CON_00009865.2	0	3141.64	1.47	Medium
	TRUE	Medium	NVQALEIELQSQLALK	1xDeamidated [Q]	1	1	5	CON_00009865.2	0	1798	1.31	Medium
	TRUE	Medium	QSLEASLAETEGRYCVQLSQIQAQISALEEQLQQIR	3xDeamidated [Q31; Q33; Q34]	1	1	1	CON_00009865.2	1	4064.01	1.24	Medium
	TRUE	Medium	SEITELRRNVQALEIELQSQLALK	3xDeamidated [N9; Q11; Q18]	1	1	1	CON_00009865.2	2	2784.5	1.07	Medium
	TRUE	Medium	LKYENEVALRQSVEADINGLR	1xDeamidated [N5]	1	1	6	CON_00009865.2	2	2418.26	1.05	Medium
	TRUE	Low	AETECQNTEYQQLLDIKIRLENEIQTYR	1xDeamidated [Q/N]; 1xC29H38O4 [C5]	1	1	5	CON_00009865.2	2	3892.96	1.15	Low
	TRUE	Low	TIDDLKNQILNLTTDNANILLQIDNAR	1xDeamidated [N/Q]	1	1	2	CON_00009865.2	1	3053.61	0.99	Low
	TRUE	Low	SKELTTEIDNNIEQISSYKSEITELR		1	1	1	CON_00009865.2	2	3040.53	0.91	Low
	TRUE	Low	YCVQLSQIQAQISALEEQLQQIRAETECQNTEYQQLLDIK		1	1	1	CON_00009865.2	1	4696.32	0.9	Low
	TRUE	Low	YCVQLSQIQAQISALEEQLQQIRAETECQNTEYQQLLDIK	1xDeamidated [Q35]	1	1	1	CON_00009865.2	1	4697.31	0.86	Low
	TRUE	Low	ALEESNYELEGK	1xDeamidated [N6]	2	2	1	CON_00009865.2; CON_00798492.2	0	1382.63	0.82	Low
	TRUE	Low	LKYENEVALRQSVEADINGLR	3xDeamidated [N5; Q11; N18]	1	1	3	CON_00009865.2	2	2420.23	0.79	Low
	TRUE	Low	NVSTGDVNVEMNAAPGVDLTQLLNNMR	3xDeamidated [N8; N12; N24]; 1xOxidation [M26]	1	1	1	CON_00009865.2	0	2891.34	0.78	Low
	TRUE	Low	NVSTGDVNVEMNAAPGVDLTQLLNNMRSQYEQLAEQNRK	1xDeamidated [N/Q]	1	1	4	CON_00009865.2	2	4348.09	0.74	Low
	TRUE	Low	RNVQALEIELQSQLALK	1xDeamidated [Q13]	1	1	1	CON_00009865.2	1	1954.1	0.72	Low
	TRUE	Low	IKEWYEKHGNSHQGEPR		1	1	3	CON_00009865.2	2	2095.01	0.72	Low
	TRUE	Low	LENEIQTYRSLLEGEGSSGGGGR	1xDeamidated [Q/N]	1	1	4	CON_00009865.2	1	2410.15	0.65	Low
	TRUE	Low	KNHEEEMKDLR		1	1	4	CON_00009865.2	2	1428.69	0.59	Low
	TRUE	Low	LASYLDKVRALEESNYELEGK	1xDeamidated [N15]	1	1	1	CON_00009865.2	2	2428.22	0.58	Low
	TRUE	Low	LKYENEVALRQSVEADINGLR	2xDeamidated [N18; Q/N]	1	1	2	CON_00009865.2	2	2419.25	0.58	Low
	TRUE	Low	VTMQNLNDRLASYLDKVR	1xDeamidated [Q/N]; 1xOxidation [M3]	4	4	6	CON_00009865.2; CON_00384444.5; CON_00225378.3; CON_00217963.3	2	2153.1	0.56	Low
	TRUE	Low	KNHEEEMKDLR	1xOxidation [M7]	1	1	2	CON_00009865.2	2	1444.68	0.55	Low
	TRUE	Low	QSLEASLAETEGRYCVQLSQIQAQISALEEQLQQIR	3xDeamidated [Q31; Q33; Q34]; 1xC29H38O4 [C15]	1	1	1	CON_00009865.2	1	4514.29	0.55	Low
	TRUE	Low	YCVQLSQIQAQISALEEQLQQIR	3xDeamidated [Q7; Q9; Q11]	1	1	1	CON_00009865.2	0	2692.35	0.54	Low
	TRUE	Low	LENEIQTYRSLLEGEGSSGGGGR	2xDeamidated [N3; Q6]	1	1	1	CON_00009865.2	1	2411.13	0.53	Low
	TRUE	Low	YCVQLSQIQAQISALEEQLQQIRAETECQNTEYQQLLDIK	2xDeamidated [Q4; Q7]	1	1	1	CON_00009865.2	1	4698.29	0.53	Low
	TRUE	Low	YCVQLSQIQAQISALEEQLQQIR	1xDeamidated [Q]	1	1	3	CON_00009865.2	0	2690.38	0.51	Low
	TRUE	Low	VLDELTLTKADLEMQIESLTEELAYLKK	1xDeamidated [Q15]	1	1	1	CON_00009865.2	2	3237.71	0.5	Low
	TRUE	Low	ELTTEIDNNIEQISSYKSEITELRR		1	1	1	CON_00009865.2	2	2981.51	0.47	Low
	TRUE	Low	VTMQNLNDRLASYLDK	1xDeamidated [N/Q]; 1xOxidation [M3]	4	4	3	CON_00009865.2; CON_00384444.5; CON_00225378.3; CON_00217963.3	1	1897.93	0.42	Low
	TRUE	Low	NQILNLTTDNANILLQIDNARLAADDFRLK	3xDeamidated [N10; N12; N19]	1	1	1	CON_00009865.2	2	3399.78	0.42	Low
	TRUE	Low	LENEIQTYRSLLEGEGSSGGGGR		1	1	1	CON_00009865.2	1	2409.16	0.37	Low
	TRUE	Low	SKELTTEIDNNIEQISSYK	3xDeamidated [N10; N11; Q14]	1	1	1	CON_00009865.2	1	2215.05	0.36	Low
	TRUE	Low	KNHEEEMKDLR	1xDeamidated [N2]; 1xOxidation [M7]	1	1	3	CON_00009865.2	2	1445.67	0.35	Low
	TRUE	Low	NVSTGDVNVEMNAAPGVDLTQLLNNMR	2xDeamidated [N8; N]; 1xOxidation [M26]	1	1	3	CON_00009865.2	0	2890.36	0.32	Low
	TRUE	Low	AETECQNTEYQQLLDIKIR	3xDeamidated [Q6; Q11; Q/N]	1	1	2	CON_00009865.2	1	2298.08	0.31	Low
	TRUE	Low	VRALEESNYELEGKIK	1xDeamidated [N8]	2	2	1	CON_00009865.2; CON_00798492.2	2	1878.98	0.28	Low
	TRUE	Low	NVSTGDVNVEMNAAPGVDLTQLLNNMR	2xOxidation [M11; M26]	1	1	1	CON_00009865.2	0	2904.38	0.24	Low
	TRUE	Low	NVSTGDVNVEMNAAPGVDLTQLLNNMR	1xDeamidated [Q/N]; 2xOxidation [M11; M26]	1	1	3	CON_00009865.2	0	2905.37	0.24	Low
	TRUE	Low	AETECQNTEYQQLLDIKIRLENEIQTYR	2xDeamidated [N/Q]; 1xC29H38O4 [C5]	1	1	3	CON_00009865.2	2	3893.94	0.24	Low
	TRUE	Low	NVSTGDVNVEMNAAPGVDLTQLLNNMR	1xDeamidated [N1]	1	1	1	CON_00009865.2	0	2873.38	0.2	Low
	TRUE	Low	LASYLDK		13	13	1	CON_00009865.2; CON_00384444.5; CON_00136056.1; CON_IPI00311493.5; CON_00225378.3; CON_IPI00015309.1; CON_00450768.7; CON_00019359.3; CON_00112947.1; CON_IPI00479145.2; CON_IPI00290077.1; CON_00217963.3; CON_IPI00230365.5	0	809.44	0.2	Low
	TRUE	Low	SQYEQLAEQNRK	1xDeamidated [Q/N]	1	1	2	CON_00009865.2	1	1494.72	0.13	Low
	TRUE	Low	LENEIQTYR		2	2	1	CON_00009865.2; CON_00798492.2	0	1165.58	0.12	Low
	TRUE	Low	ALEESNYELEGKIK		2	2	1	CON_00009865.2; CON_00798492.2	1	1622.83	0.12	Low
	TRUE	Low	QSVEADINGLR	1xDeamidated [N/Q]	6	6	2	CON_00009866.6; CON_00009865.2; CON_IPI00004550.5; CON_00136056.1; CON_IPI00873598.1; CON_00798492.2	0	1202.6	0.12	Low
	TRUE	Low	ELTTEIDNNIEQISSYK		1	1	1	CON_00009865.2	0	1996.97	0.08	Low
	TRUE	Low	NVSTGDVNVEMNAAPGVDLTQLLNNMR	2xDeamidated [N/Q]	1	1	4	CON_00009865.2	0	2874.36	0.04	Low
	TRUE	Low	NQILNLTTDNANILLQIDNARLAADDFRLK		1	1	1	CON_00009865.2	2	3396.82	0.03	Low
	TRUE	Low	NQILNLTTDNANILLQIDNARLAADDFR	2xDeamidated [N/Q]	1	1	6	CON_00009865.2	1	3157.61	0.02	Low
TRUE	Master Protein	IPI:CON_00714876.1	ENSEMBL:ENSBTAP00000038253 (Bos taurus) 63 kDa protein	76.4026	67	141	51	1	606	63.1	8.46	44.46	67
	Checked	Confidence	Sequence	Modifications	# Protein Groups	# Proteins	# PSMs	Master Protein Accessions	# Missed Cleavages	Theo. MH+ [Da]	XCorr Sequest HT	Confidence Sequest HT
	TRUE	High	FLEQQNQVLQTK		7	7	1	CON_00468956.4; CON_00347110.2; CON_IPI00376379.3; IPI:CON_00714876.1; CON_00021304.1; CON_00462140.1; CON_00220327.3	0	1475.79	4.12	High
	TRUE	High	SLNNQFASFIDKVR		2	2	3	IPI:CON_00714876.1; CON_00220327.3	1	1638.86	3.96	High
	TRUE	High	EQIKSLNNQFASFIDKVR		2	2	2	IPI:CON_00714876.1; CON_00220327.3	2	2137.14	3.85	High
	TRUE	High	SLNNQFASFIDKVR	1xDeamidated [N3]	2	2	2	IPI:CON_00714876.1; CON_00220327.3	1	1639.84	3.72	High
	TRUE	High	LLRDYQELMNTK	1xOxidation [M9]	3	3	3	CON_00622240.4; IPI:CON_00714876.1; CON_00220327.3	1	1539.78	3.4	High
	TRUE	High	SLNNQFASFIDK		2	2	2	IPI:CON_00714876.1; CON_00220327.3	0	1383.69	2.95	High
	TRUE	High	LLRDYQELMNTK		3	3	2	CON_00622240.4; IPI:CON_00714876.1; CON_00220327.3	1	1523.79	2.56	High
	TRUE	High	AQYEEIAQR		6	7	1	CON_IPI00293665.9; CON_00300725.7; IPI:CON_00714876.1; CON_00299145.9; CON_00021304.1; CON_IPI00290078.5	0	1107.54	2.55	High
	TRUE	High	TLLEGEESR		2	2	1	IPI:CON_00714876.1; CON_00220327.3	0	1033.52	2.04	High
	TRUE	Medium	TLYQAELSQMQTHISDTNVILSMDNNRNLDLNSIIDEVK	2xOxidation [M10; M23]	1	1	1	IPI:CON_00714876.1	1	4508.19	2.36	Medium
	TRUE	Medium	SDQSRLDSELK		2	2	2	IPI:CON_00714876.1; CON_00220327.3	1	1277.63	1.91	Medium
	TRUE	Medium	DYQELMNTK	1xOxidation [M6]	3	3	1	CON_00622240.4; IPI:CON_00714876.1; CON_00220327.3	0	1157.51	1.31	Medium
	TRUE	Medium	FSGGVCGGGAGGGFGSRSLINLGGSKSISISVAGGGGR	1xC29H38O4 [C6]	1	1	1	IPI:CON_00714876.1	2	3790.96	1.02	Medium
	TRUE	Low	TLYQAELSQMQTHISDTNVILSMDNNRNLDLNSIIDEVK	1xDeamidated [N]; 1xOxidation [M10]	1	1	4	IPI:CON_00714876.1	1	4493.18	1.16	Low
	TRUE	Low	MSGECVPNVSVSVSTSHTSISGGGGR	1xDeamidated [N8]	1	1	3	IPI:CON_00714876.1	0	2493.13	1.07	Low
	TRUE	Low	AEAEALYQTKYEELQITAGQHGDSLK		1	1	1	IPI:CON_00714876.1	1	2893.42	1.01	Low
	TRUE	Low	KQISSLQQAISDAEQRGENAIK	2xDeamidated [Q/N]	1	1	3	IPI:CON_00714876.1	2	2416.23	0.99	Low
	TRUE	Low	FDNLLQEIDFYKTLYQAELSQMQTHISDTNVILSMDNNR	2xDeamidated [N3; N30]	1	1	1	IPI:CON_00714876.1	1	4650.2	0.89	Low
	TRUE	Low	AQYEEIAQRSKAEAEALYQTK	1xDeamidated [Q19]	2	2	1	IPI:CON_00714876.1; CON_IPI00290078.5	2	2428.2	0.85	Low
	TRUE	Low	SLNNQFASFIDKVRFLEQQNQVLQTK	2xDeamidated [Q/N]	2	2	4	IPI:CON_00714876.1; CON_00220327.3	2	3097.6	0.83	Low
	TRUE	Low	WELLQQINTSTRTYSLEPLFEAYISR	3xDeamidated [Q5; Q6; N8]	1	1	2	IPI:CON_00714876.1	1	3161.57	0.8	Low
	TRUE	Low	LRRTVDQLK		1	1	1	IPI:CON_00714876.1	2	1128.68	0.79	Low
	TRUE	Low	ASSTKTSGGSSSVKFVSTSYSR		1	1	3	IPI:CON_00714876.1	2	2211.09	0.78	Low
	TRUE	Low	TVDQLKSDQSRLDSELK		1	1	2	IPI:CON_00714876.1	2	1962.01	0.78	Low
	TRUE	Low	DYQELMNTKLALDVEIATYR	1xDeamidated [N7]	1	1	1	IPI:CON_00714876.1	1	2387.18	0.73	Low
	TRUE	Low	FSGGVCGGGAGGGFGSRSLINLGGSKSISISVAGGGGR		1	1	2	IPI:CON_00714876.1	2	3340.68	0.7	Low
	TRUE	Low	AEAEALYQTKYEELQITAGQHGDSLKNTK		1	1	1	IPI:CON_00714876.1	2	3236.61	0.68	Low
	TRUE	Low	KQISSLQQAISDAEQRGENAIK	3xDeamidated [Q2; Q7; Q8]	1	1	1	IPI:CON_00714876.1	2	2417.22	0.68	Low
	TRUE	Low	TLYQAELSQMQTHISDTNVILSMDNNR	2xDeamidated [Q4; Q9]	1	1	1	IPI:CON_00714876.1	0	3124.46	0.67	Low
	TRUE	Low	KQISSLQQAISDAEQR		1	1	3	IPI:CON_00714876.1	1	1801.94	0.65	Low
	TRUE	Low	EQIKSLNNQFASFIDKVR	1xDeamidated [Q2]	2	2	1	IPI:CON_00714876.1; CON_00220327.3	2	2138.12	0.64	Low
	TRUE	Low	FDNLLQEIDFYK	2xDeamidated [N3; Q6]	1	1	3	IPI:CON_00714876.1	0	1546.73	0.61	Low
	TRUE	Low	DYQELMNTKLALDVEIATYRTLLEGEESR	1xOxidation [M6]	1	1	1	IPI:CON_00714876.1	2	3416.69	0.58	Low
	TRUE	Low	TNAENEFVGIKKDVDAAYITK		1	1	1	IPI:CON_00714876.1	2	2326.19	0.57	Low
	TRUE	Low	KQISSLQQAISDAEQR	3xDeamidated [Q7; Q8; Q15]	1	1	1	IPI:CON_00714876.1	1	1804.89	0.56	Low
	TRUE	Low	VRFLEQQNQVLQTK	1xDeamidated [Q/N]	7	7	4	CON_00468956.4; CON_00347110.2; CON_IPI00376379.3; IPI:CON_00714876.1; CON_00021304.1; CON_00462140.1; CON_00220327.3	1	1731.94	0.54	Low
	TRUE	Low	FLEQQNQVLQTK	3xDeamidated [Q4; Q5; N/Q]	7	7	2	CON_00468956.4; CON_00347110.2; CON_IPI00376379.3; IPI:CON_00714876.1; CON_00021304.1; CON_00462140.1; CON_00220327.3	0	1478.74	0.53	Low
	TRUE	Low	AGGSYGSGGGSSGSRRGGSGGGGGSSGGSFISSGGR		1	1	3	IPI:CON_00714876.1	2	2965.31	0.52	Low
	TRUE	Low	NLDLNSIIDEVKAQYEEIAQR	1xDeamidated [Q20]	1	1	1	IPI:CON_00714876.1	1	2462.24	0.5	Low
	TRUE	Low	LDSELKNMQDLVEDYRR	1xOxidation [M8]	1	1	2	IPI:CON_00714876.1	2	2140.03	0.48	Low
	TRUE	Low	LDSELKNMQDLVEDYR	1xOxidation [M8]	1	1	1	IPI:CON_00714876.1	1	1983.93	0.45	Low
	TRUE	Low	TVDQLKSDQSR	2xDeamidated [Q4; Q9]	1	1	1	IPI:CON_00714876.1	1	1278.62	0.45	Low
	TRUE	Low	KQISSLQQAISDAEQR	2xDeamidated [Q8; Q]	1	1	3	IPI:CON_00714876.1	1	1803.91	0.44	Low
	TRUE	Low	RSGGGGGRFSGGVCGGGAGGGFGSR	1xC29H38O4 [C14]	1	1	1	IPI:CON_00714876.1	2	2564.25	0.43	Low
	TRUE	Low	KYEDEINKR		5	5	1	CON_IPI00290857.2; CON_00622240.4; IPI:CON_00714876.1; CON_00021304.1; CON_IPI00008359.1	2	1194.61	0.43	Low
	TRUE	Low	TNAENEFVGIK	1xDeamidated [N2]	1	1	1	IPI:CON_00714876.1	0	1222.6	0.42	Low
	TRUE	Low	DVDAAYITKVDLQAK		1	1	1	IPI:CON_00714876.1	1	1649.87	0.39	Low
	TRUE	Low	NMQDLVEDYRRK		1	1	2	IPI:CON_00714876.1	2	1566.77	0.38	Low
	TRUE	Low	RGGSGGGGGSSGGSFISSGGR		1	1	2	IPI:CON_00714876.1	1	1740.8	0.38	Low
	TRUE	Low	SLINLGGSKSISISVAGGGGR	1xDeamidated [N4]	1	1	3	IPI:CON_00714876.1	1	1931.06	0.38	Low
	TRUE	Low	TNAENEFVGIK	2xDeamidated [N2; N5]	1	1	1	IPI:CON_00714876.1	0	1223.58	0.37	Low
	TRUE	Low	RTNAENEFVGIKK		1	1	1	IPI:CON_00714876.1	2	1505.81	0.36	Low
	TRUE	Low	EDMARLLRDYQELMNTK	2xDeamidated [Q11; N15]; 2xOxidation [M3; M14]	1	1	1	IPI:CON_00714876.1	2	2159.99	0.36	Low
	TRUE	Low	QISSLQQAISDAEQRGENAIK	1xDeamidated [Q1]	1	1	1	IPI:CON_00714876.1	1	2287.15	0.36	Low
	TRUE	Low	TNAENEFVGIKK	1xDeamidated [N5]	1	1	1	IPI:CON_00714876.1	1	1350.69	0.35	Low
	TRUE	Low	TYSLEPLFEAYISRLRR		1	1	1	IPI:CON_00714876.1	2	2114.14	0.34	Low
	TRUE	Low	FSGGVCGGGAGGGFGSRSLINLGGSK	1xDeamidated [N21]; 1xC29H38O4 [C6]	1	1	1	IPI:CON_00714876.1	1	2750.39	0.34	Low
	TRUE	Low	FVSTSYSR		1	1	1	IPI:CON_00714876.1	0	946.463	0.33	Low
	TRUE	Low	AQYEEIAQRSK	1xDeamidated [Q]	3	3	2	IPI:CON_00714876.1; CON_00021304.1; CON_IPI00290078.5	1	1323.65	0.33	Low
	TRUE	Low	MSGECVPNVSVSVSTSHTSISGGGGR	1xOxidation [M1]; 1xC29H38O4 [C5]	1	1	1	IPI:CON_00714876.1	0	2958.42	0.32	Low
	TRUE	Low	NMQDLVEDYR	1xDeamidated [Q/N]; 1xOxidation [M2]	1	1	4	IPI:CON_00714876.1	0	1299.55	0.3	Low
	TRUE	Low	NTKVEISELNR	1xDeamidated [N1]	1	1	1	IPI:CON_00714876.1	1	1303.69	0.29	Low
	TRUE	Low	RSTSSSVR		1	1	1	IPI:CON_00714876.1	1	879.464	0.29	Low
	TRUE	Low	YEELQITAGQHGDSLKNTKVEISELNR	1xDeamidated [N26]	1	1	1	IPI:CON_00714876.1	2	3073.54	0.28	Low
	TRUE	Low	RTVDQLKSDQSR	1xDeamidated [Q]	1	1	3	IPI:CON_00714876.1	2	1433.73	0.28	Low
	TRUE	Low	QISSLQQAISDAEQR	3xDeamidated [Q1; Q6; Q7]	1	1	1	IPI:CON_00714876.1	0	1676.8	0.28	Low
	TRUE	Low	KDVDAAYITKVDLQAK	1xDeamidated [Q14]	1	1	1	IPI:CON_00714876.1	2	1778.95	0.27	Low
	TRUE	Low	LNELEDALQK		1	1	1	IPI:CON_00714876.1	0	1172.62	0.27	Low
	TRUE	Low	STSSSVRRSGGGGGR		1	1	1	IPI:CON_00714876.1	2	1407.7	0.26	Low
	TRUE	Low	MSRHFSSRSGYR	1xOxidation [M1]	1	1	3	IPI:CON_00714876.1	2	1486.7	0.26	Low
	TRUE	Low	LDSELKNMQDLVEDYRR	1xDeamidated [Q9]; 1xOxidation [M8]	1	1	1	IPI:CON_00714876.1	2	2141.02	0.25	Low
	TRUE	Low	WELLQQINTSTRTYSLEPLFEAYISRLR	2xDeamidated [Q5; Q6]	1	1	1	IPI:CON_00714876.1	2	3429.77	0.24	Low
	TRUE	Low	DYQELMNTKLALDVEIATYR	1xOxidation [M6]	1	1	1	IPI:CON_00714876.1	1	2402.19	0.23	Low
	TRUE	Low	WELLQQINTSTRTYSLEPLFEAYISRLR	3xDeamidated [Q5; Q6; N8]	1	1	1	IPI:CON_00714876.1	2	3430.75	0.23	Low
	TRUE	Low	SGYRCGGGGGGFSSGSAGVVSYQR	1xC29H38O4 [C5]	1	1	1	IPI:CON_00714876.1	1	2703.29	0.22	Low
	TRUE	Low	KYEDEINKR	1xDeamidated [N7]	5	5	1	CON_IPI00290857.2; CON_00622240.4; IPI:CON_00714876.1; CON_00021304.1; CON_IPI00008359.1	2	1195.6	0.2	Low
	TRUE	Low	NLDLNSIIDEVK	2xDeamidated [N1; N5]	1	1	1	IPI:CON_00714876.1	0	1374.7	0.2	Low
	TRUE	Low	DYQELMNTKLALDVEIATYR	2xDeamidated [Q3; N7]	1	1	1	IPI:CON_00714876.1	1	2388.16	0.17	Low
	TRUE	Low	AKEDMAR		1	1	1	IPI:CON_00714876.1	1	820.398	0.17	Low
	TRUE	Low	FSGGVCGGGAGGGFGSR		1	1	1	IPI:CON_00714876.1	0	1429.63	0.16	Low
	TRUE	Low	MSRHFSSRSGYR	1xAcetyl [N-Term]	1	1	1	IPI:CON_00714876.1	2	1512.71	0.16	Low
	TRUE	Low	EQIKSLNNQFASFIDKVR	3xDeamidated [Q2; N8; Q9]	2	2	1	IPI:CON_00714876.1; CON_00220327.3	2	2140.09	0.16	Low
	TRUE	Low	NMQDLVEDYRRK	1xOxidation [M2]	1	1	1	IPI:CON_00714876.1	2	1582.76	0.14	Low
	TRUE	Low	EQIKSLNNQFASFIDK	3xDeamidated [Q2; N8; N/Q]	2	2	2	IPI:CON_00714876.1; CON_00220327.3	1	1884.92	0.1	Low
	TRUE	Low	CGGGGGGFSSGSAGVVSYQR		1	1	1	IPI:CON_00714876.1	0	1789.79	0.09	Low
	TRUE	Low	YEDEINKR	1xDeamidated [N6]	20	21	1	CON_IPI00748057.2; CON_IPI00290857.2; CON_00622240.4; CON_IPI00376379.3; CON_IPI00005859.3; CON_IPI00293665.9; CON_00300725.7; IPI:CON_00714876.1; CON_00131368.3; CON_00221797.1; CON_00124499.2; IPI:CON_00697851.1; CON_00299145.9; CON_00021304.1; CON_00462140.1; CON_IPI00008359.1; CON_00220327.3; CON_IPI00554648.3; CON_00139301.3; CON_00009867.3	1	1067.5	0.08	Low
	TRUE	Low	NMQDLVEDYR		1	1	1	IPI:CON_00714876.1	0	1282.57	0.07	Low
	TRUE	Low	LDSELKNMQDLVEDYR	1xDeamidated [N/Q]; 1xOxidation [M8]	1	1	2	IPI:CON_00714876.1	1	1984.92	0.04	Low
	TRUE	Low	NMQDLVEDYR	1xDeamidated [N/Q]	1	1	2	IPI:CON_00714876.1	0	1283.56	0.02	Low
TRUE	Master Protein	IPI:CON_00697851.1	SWISS-PROT:Q5XQN5 (Bos taurus) Keratin, type II cytoskeletal 5	54.9085	67	183	18	1	601	62.9	7.81	32.66	67
	Checked	Confidence	Sequence	Modifications	# Protein Groups	# Proteins	# PSMs	Master Protein Accessions	# Missed Cleavages	Theo. MH+ [Da]	XCorr Sequest HT	Confidence Sequest HT
	TRUE	High	SRTEAESWYQTKYEELQQTAGR		3	3	2	IPI:CON_00697851.1; CON_00139301.3; CON_00009867.3	2	2661.25	5.04	High
	TRUE	High	TLNNKFASFIDKVR		23	24	3	CON_IPI00847342.1; CON_IPI00290857.2; CON_00622240.4; IPI:CON_105456; CON_IPI00005859.3; CON_IPI00293665.9; CON_00300725.7; CON_IPI00241841.9; CON_00131368.3; CON_00221797.1; CON_00124499.2; IPI:CON_00697851.1; CON_00299145.9; CON_00420312.4; IPI:CON_130456; CON_00021304.1; CON_00462140.1; CON_IPI00008359.1; CON_IPI00306959.10; CON_IPI00406377.3; CON_IPI00554648.3; CON_00139301.3; CON_00009867.3	2	1652.91	4.51	High
	TRUE	High	SLDLDSIIAEVK		5	5	1	CON_00131368.3; CON_00221797.1; IPI:CON_00697851.1; CON_00220327.3; CON_00139301.3	0	1302.72	3.38	High
	TRUE	High	TEAESWYQTKYEELQQTAGR		3	3	1	IPI:CON_00697851.1; CON_00139301.3; CON_00009867.3	1	2418.12	3.08	High
	TRUE	High	NKYEDEINKR		11	12	5	CON_IPI00748057.2; CON_IPI00293665.9; CON_00300725.7; CON_00124499.2; IPI:CON_00697851.1; CON_00299145.9; CON_00462140.1; CON_00220327.3; CON_IPI00554648.3; CON_00139301.3; CON_00009867.3	2	1308.65	2.8	High
	TRUE	High	FASFIDKVR		31	32	1	CON_IPI00847342.1; CON_IPI00329306.3; CON_IPI00290857.2; CON_00622240.4; CON_IPI00174775.2; CON_00468956.4; IPI:CON_105456; CON_00347110.2; CON_IPI00376379.3; CON_IPI00005859.3; CON_IPI00293665.9; CON_00300725.7; CON_IPI00241841.9; CON_00131368.3; CON_00347096.2; CON_00221797.1; CON_00124499.2; IPI:CON_00697851.1; CON_00299145.9; CON_00420312.4; IPI:CON_130456; CON_00021304.1; CON_00462140.1; CON…	1	1082.6	2.64	High
	TRUE	High	SLYNLGGSKR		2	2	1	IPI:CON_00697851.1; CON_00009867.3	1	1094.6	2.35	High
	TRUE	Medium	LRSEIDNVKK		3	3	1	IPI:CON_00697851.1; CON_00220327.3; CON_00139301.3	2	1201.69	2.11	Medium
	TRUE	Medium	YEELQQTAGR		3	3	1	IPI:CON_00697851.1; CON_00139301.3; CON_00009867.3	0	1194.57	1.66	Medium
	TRUE	Medium	FLEQQNK		28	29	2	IPI:CON_104456; CON_IPI00847342.1; CON_IPI00290857.2; IPI:CON_105456; CON_00124800.2; CON_IPI00005859.3; CON_IPI00293665.9; CON_00300725.7; CON_IPI00241841.9; CON_00131368.3; IPI:CON_106456; CON_00221797.1; CON_00124499.2; IPI:CON_00697851.1; CON_00299145.9; CON_00420312.4; IPI:CON_130456; CON_IPI00008359.1; IPI:CON_107456; CON_IPI00787323.2; CON_IPI00306959.10; CON_00166205.2; CON_IPI00406377.3;…	0	906.468	1.56	Medium
	TRUE	Medium	MIQRLRSEIDNVK	2xDeamidated [Q3; N11]; 1xOxidation [M1]	2	2	5	IPI:CON_00697851.1; CON_00139301.3	2	1619.84	1.05	Medium
	TRUE	Medium	KQCANLQNAIADAEQR	2xDeamidated [Q7; Q15]	2	2	1	IPI:CON_00697851.1; CON_00009867.3	1	1774.84	0.85	Medium
	TRUE	Low	YEDEINKRTTAENEFVMLK	2xDeamidated [N6; N13]; 1xOxidation [M17]	3	3	3	IPI:CON_00697851.1; CON_00139301.3; CON_00009867.3	2	2348.1	0.99	Low
	TRUE	Low	RQLDGIVGER		1	1	2	IPI:CON_00697851.1	1	1142.63	0.93	Low
	TRUE	Low	QCANLQNAIADAEQRGELALK	1xDeamidated [Q/N]	2	2	2	IPI:CON_00697851.1; CON_00009867.3	1	2257.12	0.87	Low
	TRUE	Low	QCANLQNAIADAEQRGELALKDAR	1xDeamidated [Q14]	2	2	1	IPI:CON_00697851.1; CON_00009867.3	2	2599.29	0.79	Low
	TRUE	Low	LAELEDALQKAKQDMAR	2xDeamidated [Q9; Q13]; 1xOxidation [M15]	1	1	2	IPI:CON_00697851.1	2	1947.97	0.78	Low
	TRUE	Low	LDSELRNMQDLVEDFK	1xOxidation [M8]	2	2	1	IPI:CON_00697851.1; CON_00009867.3	1	1967.94	0.76	Low
	TRUE	Low	QSTVSFRSGGGR	1xDeamidated [Q1]	1	1	1	IPI:CON_00697851.1	1	1239.61	0.76	Low
	TRUE	Low	KQCANLQNAIADAEQR	2xDeamidated [Q7; Q15]; 1xC29H38O4 [C3]	2	2	1	IPI:CON_00697851.1; CON_00009867.3	1	2225.12	0.76	Low
	TRUE	Low	QDMARLLREYQELMNTK		3	3	1	IPI:CON_00697851.1; CON_00139301.3; CON_00009867.3	2	2139.07	0.7	Low
	TRUE	Low	TVRQNLEPLLEQYINNLR		1	1	1	IPI:CON_00697851.1	1	2213.2	0.7	Low
	TRUE	Low	TTAENEFVMLKK	1xDeamidated [N5]	3	3	2	IPI:CON_00697851.1; CON_00139301.3; CON_00009867.3	1	1411.71	0.69	Low
	TRUE	Low	WALLQEQGTKTVRQNLEPLLEQYINNLR	1xDeamidated [N26]	1	1	1	IPI:CON_00697851.1	2	3368.8	0.67	Low
	TRUE	Low	HEISEMNRMIQR	1xDeamidated [Q/N]	3	3	4	IPI:CON_00697851.1; CON_00139301.3; CON_00009867.3	1	1544.73	0.63	Low
	TRUE	Low	QDMARLLREYQELMNTK	2xOxidation [M3; M14]	3	3	1	IPI:CON_00697851.1; CON_00139301.3; CON_00009867.3	2	2171.06	0.63	Low
	TRUE	Low	TTAENEFVMLKKDVDAAYMNK		3	3	1	IPI:CON_00697851.1; CON_00139301.3; CON_00009867.3	2	2418.17	0.63	Low
	TRUE	Low	KDVDAAYMNKVELEAK	1xOxidation [M8]	3	3	2	CON_IPI00005859.3; IPI:CON_00697851.1; CON_00009867.3	2	1839.92	0.61	Low
	TRUE	Low	MIQRLRSEIDNVK	1xDeamidated [Q/N]; 1xOxidation [M1]	2	2	13	IPI:CON_00697851.1; CON_00139301.3	2	1618.86	0.6	Low
	TRUE	Low	VRFLEQQNK	2xDeamidated [Q6; N8]	28	29	2	IPI:CON_104456; CON_IPI00847342.1; CON_IPI00290857.2; IPI:CON_105456; CON_00124800.2; CON_IPI00005859.3; CON_IPI00293665.9; CON_00300725.7; CON_IPI00241841.9; CON_00131368.3; IPI:CON_106456; CON_00221797.1; CON_00124499.2; IPI:CON_00697851.1; CON_00299145.9; CON_00420312.4; IPI:CON_130456; CON_IPI00008359.1; IPI:CON_107456; CON_IPI00787323.2; CON_IPI00306959.10; CON_00166205.2; CON_IPI00406377.3;…	1	1163.61	0.59	Low
	TRUE	Low	RISISASGGGFRNR	1xDeamidated [N13]	1	1	2	IPI:CON_00697851.1	2	1478.78	0.58	Low
	TRUE	Low	KQCANLQNAIADAEQR	3xDeamidated [Q2; Q7; Q15]; 1xC29H38O4 [C3]	2	2	1	IPI:CON_00697851.1; CON_00009867.3	1	2226.1	0.57	Low
	TRUE	Low	QNLEPLLEQYINNLRR	2xDeamidated [N12; N]	1	1	2	IPI:CON_00697851.1	1	2015.06	0.57	Low
	TRUE	Low	MFFDAELSQMQTHVSDTSVVLSMDNNR	3xOxidation [M1; M10; M23]	3	3	1	IPI:CON_00697851.1; CON_00139301.3; CON_00009867.3	0	3150.38	0.53	Low
	TRUE	Low	KDVDAAYMNKVELEAK	1xDeamidated [N9]	3	3	1	CON_IPI00005859.3; IPI:CON_00697851.1; CON_00009867.3	2	1824.9	0.51	Low
	TRUE	Low	KQCANLQNAIADAEQR	3xDeamidated [Q2; N5; N8]	2	2	1	IPI:CON_00697851.1; CON_00009867.3	1	1775.82	0.49	Low
	TRUE	Low	TTAENEFVMLKK		3	3	3	IPI:CON_00697851.1; CON_00139301.3; CON_00009867.3	1	1410.73	0.49	Low
	TRUE	Low	TLNNKFASFIDK	1xDeamidated [N]	24	25	7	CON_IPI00847342.1; CON_IPI00290857.2; CON_00622240.4; IPI:CON_105456; CON_IPI00005859.3; CON_IPI00293665.9; CON_00300725.7; CON_IPI00241841.9; CON_00131368.3; CON_00221797.1; CON_00124499.2; IPI:CON_00697851.1; CON_00299145.9; CON_00420312.4; IPI:CON_130456; CON_00021304.1; CON_IPI00017870.1; CON_00462140.1; CON_IPI00008359.1; CON_IPI00306959.10; CON_IPI00406377.3; CON_IPI00554648.3; CON_00139301…	1	1398.73	0.48	Low
	TRUE	Low	VRFLEQQNKVLDTK	3xDeamidated [Q6; Q7; N8]	6	7	1	CON_IPI00293665.9; CON_00131368.3; IPI:CON_00697851.1; CON_00299145.9; CON_00139301.3; CON_00009867.3	2	1720.91	0.48	Low
	TRUE	Low	KQCANLQNAIADAEQRGELALK	2xDeamidated [Q/N]	2	2	10	IPI:CON_00697851.1; CON_00009867.3	2	2386.2	0.47	Low
	TRUE	Low	SKLAELEDALQKAK	1xDeamidated [Q11]	1	1	1	IPI:CON_00697851.1	2	1544.85	0.47	Low
	TRUE	Low	TTAENEFVMLK		3	3	1	IPI:CON_00697851.1; CON_00139301.3; CON_00009867.3	0	1282.63	0.47	Low
	TRUE	Low	TVRQNLEPLLEQYINNLR	1xDeamidated [N/Q]	1	1	3	IPI:CON_00697851.1	1	2214.19	0.46	Low
	TRUE	Low	VLDTKWALLQEQGTK	2xDeamidated [Q10; Q12]	3	3	1	CON_00131368.3; IPI:CON_00697851.1; CON_00139301.3	1	1731.92	0.45	Low
	TRUE	Low	VLDTKWALLQEQGTK	1xDeamidated [Q]	3	3	2	CON_00131368.3; IPI:CON_00697851.1; CON_00139301.3	1	1730.93	0.45	Low
	TRUE	Low	QNLEPLLEQYINNLR	2xDeamidated [N12; N13]	1	1	2	IPI:CON_00697851.1	0	1858.95	0.44	Low
	TRUE	Low	LAELEDALQKAKQDMAR	1xOxidation [M15]	1	1	2	IPI:CON_00697851.1	2	1946	0.44	Low
	TRUE	Low	LDSELRNMQDLVEDFKNK	1xDeamidated [Q9]	2	2	2	IPI:CON_00697851.1; CON_00009867.3	2	2195.06	0.44	Low
	TRUE	Low	KQCANLQNAIADAEQR		2	2	2	IPI:CON_00697851.1; CON_00009867.3	1	1772.87	0.42	Low
	TRUE	Low	YEELQQTAGRHGDDLRNTK		3	3	2	IPI:CON_00697851.1; CON_00139301.3; CON_00009867.3	2	2231.08	0.41	Low
	TRUE	Low	VELEAKVDALMDEINFMK		2	2	2	IPI:CON_00697851.1; CON_00009867.3	1	2095.04	0.41	Low
	TRUE	Low	RTTAENEFVMLKK	1xOxidation [M10]	3	3	1	IPI:CON_00697851.1; CON_00139301.3; CON_00009867.3	2	1582.83	0.33	Low
	TRUE	Low	QNLEPLLEQYINNLRR	3xDeamidated [Q1; Q9; N13]	1	1	1	IPI:CON_00697851.1	1	2016.04	0.33	Low
	TRUE	Low	RTTAENEFVMLK	1xDeamidated [N6]; 1xOxidation [M10]	3	3	1	IPI:CON_00697851.1; CON_00139301.3; CON_00009867.3	1	1455.71	0.33	Low
	TRUE	Low	TTAENEFVMLKK	1xOxidation [M9]	3	3	2	IPI:CON_00697851.1; CON_00139301.3; CON_00009867.3	1	1426.72	0.32	Low
	TRUE	Low	QLDGIVGERGR	1xDeamidated [Q1]	1	1	1	IPI:CON_00697851.1	1	1200.63	0.31	Low
	TRUE	Low	TVRQNLEPLLEQYINNLR	2xDeamidated [N15; N16]	1	1	1	IPI:CON_00697851.1	1	2215.17	0.31	Low
	TRUE	Low	MSRQSTVSFRSGGGR		1	1	1	IPI:CON_00697851.1	2	1612.8	0.3	Low
	TRUE	Low	SLYNLGGSKRISISASGGGFR		1	1	1	IPI:CON_00697851.1	2	2127.13	0.29	Low
	TRUE	Low	QCANLQNAIADAEQRGELALKDAR	2xDeamidated [N/Q]	2	2	2	IPI:CON_00697851.1; CON_00009867.3	2	2600.27	0.28	Low
	TRUE	Low	TEAESWYQTKYEELQQTAGR	2xDeamidated [Q15; Q]	3	3	2	IPI:CON_00697851.1; CON_00139301.3; CON_00009867.3	1	2420.09	0.25	Low
	TRUE	Low	SFSTASAITPSVSR		2	2	1	IPI:CON_00697851.1; CON_00009867.3	0	1410.72	0.25	Low
	TRUE	Low	NTKHEISEMNRMIQR	2xOxidation [M9; M12]	3	3	1	IPI:CON_00697851.1; CON_00139301.3; CON_00009867.3	2	1918.92	0.25	Low
	TRUE	Low	QCANLQNAIADAEQRGELALKDAR	1xDeamidated [Q/N]; 1xC29H38O4 [C2]	2	2	4	IPI:CON_00697851.1; CON_00009867.3	2	3049.57	0.25	Low
	TRUE	Low	KQCANLQNAIADAEQRGELALK	3xDeamidated [Q2; Q/N]	2	2	3	IPI:CON_00697851.1; CON_00009867.3	2	2387.19	0.24	Low
	TRUE	Low	HEISEMNRMIQR	2xDeamidated [N7; Q11]; 2xOxidation [M6; M9]	3	3	1	IPI:CON_00697851.1; CON_00139301.3; CON_00009867.3	1	1577.7	0.24	Low
	TRUE	Low	QLDGIVGERGRLDSELR		1	1	1	IPI:CON_00697851.1	2	1913.02	0.24	Low
	TRUE	Low	LDSELRNMQDLVEDFKNK		2	2	1	IPI:CON_00697851.1; CON_00009867.3	2	2194.08	0.24	Low
	TRUE	Low	QNLEPLLEQYINNLR		1	1	1	IPI:CON_00697851.1	0	1856.99	0.23	Low
	TRUE	Low	TEAESWYQTKYEELQQTAGRHGDDLR	2xDeamidated [Q15; Q]	3	3	2	IPI:CON_00697851.1; CON_00139301.3; CON_00009867.3	2	3113.41	0.23	Low
	TRUE	Low	QSTVSFR	1xDeamidated [Q1]	1	1	1	IPI:CON_00697851.1	0	825.41	0.23	Low
	TRUE	Low	LAELEDALQKAKQDMAR	2xDeamidated [Q9; Q13]	1	1	1	IPI:CON_00697851.1	2	1931.97	0.22	Low
	TRUE	Low	MFFDAELSQMQTHVSDTSVVLSMDNNRSLDLDSIIAEVK	1xDeamidated [N/Q]; 2xOxidation [M1; M10]	2	2	4	IPI:CON_00697851.1; CON_00139301.3	1	4419.07	0.21	Low
	TRUE	Low	KDVDAAYMNKVELEAK	1xDeamidated [N9]; 1xOxidation [M8]	3	3	1	CON_IPI00005859.3; IPI:CON_00697851.1; CON_00009867.3	2	1840.9	0.21	Low
	TRUE	Low	LLREYQELMNTK	2xDeamidated [Q6; N10]	3	3	1	IPI:CON_00697851.1; CON_00139301.3; CON_00009867.3	1	1539.77	0.2	Low
	TRUE	Low	MIQRLRSEIDNVK		2	2	1	IPI:CON_00697851.1; CON_00139301.3	2	1601.88	0.2	Low
	TRUE	Low	DVDAAYMNK	1xDeamidated [N8]; 1xOxidation [M7]	10	11	1	CON_IPI00005859.3; CON_IPI00293665.9; CON_00300725.7; CON_00131368.3; CON_00347096.2; IPI:CON_00697851.1; CON_00299145.9; CON_IPI00103481.3; CON_00139301.3; CON_00009867.3	0	1043.43	0.19	Low
	TRUE	Low	HEISEMNRMIQRLR		3	3	1	IPI:CON_00697851.1; CON_00139301.3; CON_00009867.3	2	1812.93	0.18	Low
	TRUE	Low	VDALMDEINFMK	1xDeamidated [N9]; 1xOxidation [M]	3	3	2	IPI:CON_00697851.1; CON_00139301.3; CON_00009867.3	0	1442.65	0.18	Low
	TRUE	Low	KDVDAAYMNKVELEAK		3	3	1	CON_IPI00005859.3; IPI:CON_00697851.1; CON_00009867.3	2	1823.92	0.18	Low
	TRUE	Low	MIQRLR	1xDeamidated [Q3]	13	14	1	CON_IPI00290857.2; CON_IPI00005859.3; CON_IPI00293665.9; CON_00300725.7; CON_00131368.3; CON_00221797.1; IPI:CON_00697851.1; CON_00299145.9; CON_00420312.4; CON_IPI00008359.1; CON_IPI00290078.5; CON_00139301.3; CON_00009867.3	1	817.471	0.17	Low
	TRUE	Low	AKQDMAR	1xDeamidated [Q3]	10	10	1	CON_IPI00005859.3; CON_00131368.3; CON_00221797.1; IPI:CON_00697851.1; CON_IPI00787323.2; CON_IPI00306959.10; CON_00660358.2; CON_IPI00554648.3; CON_00139301.3; CON_00009867.3	1	820.398	0.17	Low
	TRUE	Low	DVDAAYMNKVELEAK	1xDeamidated [N8]; 1xOxidation [M7]	3	3	1	CON_IPI00005859.3; IPI:CON_00697851.1; CON_00009867.3	1	1712.8	0.16	Low
	TRUE	Low	QNLEPLLEQYINNLR	3xDeamidated [Q1; Q9; N13]	1	1	1	IPI:CON_00697851.1	0	1859.94	0.16	Low
	TRUE	Low	SEIDNVKKQCANLQNAIADAEQR	1xC29H38O4 [C10]	1	1	1	IPI:CON_00697851.1	2	3008.54	0.15	Low
	TRUE	Low	TLNNKFASFIDK	2xDeamidated [N3; N4]	24	25	2	CON_IPI00847342.1; CON_IPI00290857.2; CON_00622240.4; IPI:CON_105456; CON_IPI00005859.3; CON_IPI00293665.9; CON_00300725.7; CON_IPI00241841.9; CON_00131368.3; CON_00221797.1; CON_00124499.2; IPI:CON_00697851.1; CON_00299145.9; CON_00420312.4; IPI:CON_130456; CON_00021304.1; CON_IPI00017870.1; CON_00462140.1; CON_IPI00008359.1; CON_IPI00306959.10; CON_IPI00406377.3; CON_IPI00554648.3; CON_00139301…	1	1399.71	0.15	Low
	TRUE	Low	TLNNKFASFIDKVR	2xDeamidated [N3; N4]	23	24	1	CON_IPI00847342.1; CON_IPI00290857.2; CON_00622240.4; IPI:CON_105456; CON_IPI00005859.3; CON_IPI00293665.9; CON_00300725.7; CON_IPI00241841.9; CON_00131368.3; CON_00221797.1; CON_00124499.2; IPI:CON_00697851.1; CON_00299145.9; CON_00420312.4; IPI:CON_130456; CON_00021304.1; CON_00462140.1; CON_IPI00008359.1; CON_IPI00306959.10; CON_IPI00406377.3; CON_IPI00554648.3; CON_00139301.3; CON_00009867.3	2	1654.88	0.15	Low
	TRUE	Low	MFFDAELSQMQTHVSDTSVVLSMDNNRSLDLDSIIAEVK	2xDeamidated [Q9; Q11]; 1xOxidation [M23]	2	2	1	IPI:CON_00697851.1; CON_00139301.3	1	4404.06	0.14	Low
	TRUE	Low	MSRQSTVSFR	1xDeamidated [Q4]; 1xOxidation [M1]	1	1	2	IPI:CON_00697851.1	1	1215.58	0.13	Low
	TRUE	Low	GRLDSELR		8	9	1	CON_IPI00293665.9; CON_00300725.7; CON_IPI00241841.9; CON_00131368.3; IPI:CON_00697851.1; CON_00299145.9; CON_00139301.3; CON_00009867.3	1	945.511	0.12	Low
	TRUE	Low	LLREYQELMNTK		3	3	1	IPI:CON_00697851.1; CON_00139301.3; CON_00009867.3	1	1537.8	0.12	Low
	TRUE	Low	QNLEPLLEQYINNLRRQLDGIVGER	3xDeamidated [N12; N13; N/Q]	1	1	2	IPI:CON_00697851.1	2	2983.55	0.11	Low
	TRUE	Low	SKLAELEDALQKAK		1	1	1	IPI:CON_00697851.1	2	1543.87	0.11	Low
	TRUE	Low	WALLQEQGTKTVRQNLEPLLEQYINNLR	2xDeamidated [Q/N]	1	1	4	IPI:CON_00697851.1	2	3369.78	0.11	Low
	TRUE	Low	YEDEINKR	1xDeamidated [N6]	20	21	1	CON_IPI00748057.2; CON_IPI00290857.2; CON_00622240.4; CON_IPI00376379.3; CON_IPI00005859.3; CON_IPI00293665.9; CON_00300725.7; IPI:CON_00714876.1; CON_00131368.3; CON_00221797.1; CON_00124499.2; IPI:CON_00697851.1; CON_00299145.9; CON_00021304.1; CON_00462140.1; CON_IPI00008359.1; CON_00220327.3; CON_IPI00554648.3; CON_00139301.3; CON_00009867.3	1	1067.5	0.08	Low
	TRUE	Low	NTKHEISEMNRMIQR	3xDeamidated [N1; N10; Q14]; 1xOxidation [M12]	3	3	1	IPI:CON_00697851.1; CON_00139301.3; CON_00009867.3	2	1905.88	0.07	Low
	TRUE	Low	LRSEIDNVK		3	3	1	IPI:CON_00697851.1; CON_00220327.3; CON_00139301.3	1	1073.59	0.07	Low
	TRUE	Low	NMQDLVEDFKNK	3xDeamidated [N1; Q3; N11]; 1xOxidation [M2]	2	2	1	IPI:CON_00697851.1; CON_00009867.3	1	1499.66	0.05	Low
	TRUE	Low	TTAENEFVMLKKDVDAAYMNK	1xDeamidated [N20]; 2xOxidation [M9; M19]	3	3	1	IPI:CON_00697851.1; CON_00139301.3; CON_00009867.3	2	2451.14	0.04	Low
	TRUE	Low	NKYEDEINK	2xDeamidated [N1; N8]	14	15	1	CON_IPI00748057.2; CON_IPI00293665.9; CON_00300725.7; CON_IPI00241841.9; CON_00124499.2; IPI:CON_00697851.1; CON_00299145.9; CON_IPI00017870.1; CON_00462140.1; CON_00220327.3; CON_IPI00787323.2; CON_IPI00554648.3; CON_00139301.3; CON_00009867.3	1	1154.52	0.03	Low
	TRUE	Low	QSTVSFRSGGGRSFSTASAITPSVSR	1xDeamidated [Q1]	1	1	1	IPI:CON_00697851.1	2	2631.31	0.02	Low
TRUE	Master Protein	CON_00009867.3	Keratin, type II cytoskeletal 5	60	70	207	15	1	590	62.3	7.74	32.18	70
	Checked	Confidence	Sequence	Modifications	# Protein Groups	# Proteins	# PSMs	Master Protein Accessions	# Missed Cleavages	Theo. MH+ [Da]	XCorr Sequest HT	Confidence Sequest HT
	TRUE	High	SRTEAESWYQTKYEELQQTAGR		3	3	2	IPI:CON_00697851.1; CON_00139301.3; CON_00009867.3	2	2661.25	5.04	High
	TRUE	High	TLNNKFASFIDKVR		23	24	3	CON_IPI00847342.1; CON_IPI00290857.2; CON_00622240.4; IPI:CON_105456; CON_IPI00005859.3; CON_IPI00293665.9; CON_00300725.7; CON_IPI00241841.9; CON_00131368.3; CON_00221797.1; CON_00124499.2; IPI:CON_00697851.1; CON_00299145.9; CON_00420312.4; IPI:CON_130456; CON_00021304.1; CON_00462140.1; CON_IPI00008359.1; CON_IPI00306959.10; CON_IPI00406377.3; CON_IPI00554648.3; CON_00139301.3; CON_00009867.3	2	1652.91	4.51	High
	TRUE	High	TEAESWYQTKYEELQQTAGR		3	3	1	IPI:CON_00697851.1; CON_00139301.3; CON_00009867.3	1	2418.12	3.08	High
	TRUE	High	NKYEDEINKR		11	12	5	CON_IPI00748057.2; CON_IPI00293665.9; CON_00300725.7; CON_00124499.2; IPI:CON_00697851.1; CON_00299145.9; CON_00462140.1; CON_00220327.3; CON_IPI00554648.3; CON_00139301.3; CON_00009867.3	2	1308.65	2.8	High
	TRUE	High	FASFIDKVR		31	32	1	CON_IPI00847342.1; CON_IPI00329306.3; CON_IPI00290857.2; CON_00622240.4; CON_IPI00174775.2; CON_00468956.4; IPI:CON_105456; CON_00347110.2; CON_IPI00376379.3; CON_IPI00005859.3; CON_IPI00293665.9; CON_00300725.7; CON_IPI00241841.9; CON_00131368.3; CON_00347096.2; CON_00221797.1; CON_00124499.2; IPI:CON_00697851.1; CON_00299145.9; CON_00420312.4; IPI:CON_130456; CON_00021304.1; CON_00462140.1; CON…	1	1082.6	2.64	High
	TRUE	High	QLDSIVGER		3	4	1	CON_00300725.7; CON_00299145.9; CON_00009867.3	0	1016.54	2.58	High
	TRUE	High	ISISTSGGSFR		1	1	1	CON_00009867.3	0	1111.57	2.43	High
	TRUE	High	SLYNLGGSKR		2	2	1	IPI:CON_00697851.1; CON_00009867.3	1	1094.6	2.35	High
	TRUE	Medium	YEELQQTAGR		3	3	1	IPI:CON_00697851.1; CON_00139301.3; CON_00009867.3	0	1194.57	1.66	Medium
	TRUE	Medium	FLEQQNK		28	29	2	IPI:CON_104456; CON_IPI00847342.1; CON_IPI00290857.2; IPI:CON_105456; CON_00124800.2; CON_IPI00005859.3; CON_IPI00293665.9; CON_00300725.7; CON_IPI00241841.9; CON_00131368.3; IPI:CON_106456; CON_00221797.1; CON_00124499.2; IPI:CON_00697851.1; CON_00299145.9; CON_00420312.4; IPI:CON_130456; CON_IPI00008359.1; IPI:CON_107456; CON_IPI00787323.2; CON_IPI00306959.10; CON_00166205.2; CON_IPI00406377.3;…	0	906.468	1.56	Medium
	TRUE	Medium	VSLAGACGVGGYGSRSLYNLGGSK	1xDeamidated [N19]	1	1	3	CON_00009867.3	1	2274.12	1.24	Medium
	TRUE	Medium	TVRQNLEPLFEQYINNLR	2xDeamidated [Q4; Q12]	4	5	8	CON_IPI00293665.9; CON_00300725.7; CON_00299145.9; CON_00009867.3	1	2249.16	1.22	Medium
	TRUE	Medium	VSLAGACGVGGYGSRSLYNLGGSK		1	1	1	CON_00009867.3	1	2273.13	1.19	Medium
	TRUE	Medium	MIQRLRAEIDNVK	2xDeamidated [Q3; N11]; 1xOxidation [M1]	1	1	8	CON_00009867.3	2	1603.85	1.15	Medium
	TRUE	Medium	MIQRLRAEIDNVK	1xDeamidated [Q3]; 1xOxidation [M1]	1	1	2	CON_00009867.3	2	1602.86	1.1	Medium
	TRUE	Medium	KQCANLQNAIADAEQR	2xDeamidated [Q7; Q15]	2	2	1	IPI:CON_00697851.1; CON_00009867.3	1	1774.84	0.85	Medium
	TRUE	Low	MFFDAELSQMQTHVSDTSVVLSMDNNRNLDLDSIIAEVK	1xDeamidated [N]	1	1	3	CON_00009867.3	1	4414.09	1.05	Low
	TRUE	Low	YEDEINKRTTAENEFVMLK	2xDeamidated [N6; N13]; 1xOxidation [M17]	3	3	3	IPI:CON_00697851.1; CON_00139301.3; CON_00009867.3	2	2348.1	0.99	Low
	TRUE	Low	QCANLQNAIADAEQRGELALK	1xDeamidated [Q/N]	2	2	2	IPI:CON_00697851.1; CON_00009867.3	1	2257.12	0.87	Low
	TRUE	Low	LAELEEALQKAKQDMAR	2xDeamidated [Q9; Q13]	1	1	5	CON_00009867.3	2	1945.99	0.84	Low
	TRUE	Low	AEIDNVKKQCANLQNAIADAEQR		1	1	1	CON_00009867.3	2	2542.27	0.84	Low
	TRUE	Low	QCANLQNAIADAEQRGELALKDAR	1xDeamidated [Q14]	2	2	1	IPI:CON_00697851.1; CON_00009867.3	2	2599.29	0.79	Low
	TRUE	Low	LDSELRNMQDLVEDFK	1xOxidation [M8]	2	2	1	IPI:CON_00697851.1; CON_00009867.3	1	1967.94	0.76	Low
	TRUE	Low	KQCANLQNAIADAEQR	2xDeamidated [Q7; Q15]; 1xC29H38O4 [C3]	2	2	1	IPI:CON_00697851.1; CON_00009867.3	1	2225.12	0.76	Low
	TRUE	Low	QNLEPLFEQYINNLR	2xDeamidated [N/Q]	4	5	7	CON_IPI00293665.9; CON_00300725.7; CON_00299145.9; CON_00009867.3	0	1892.94	0.71	Low
	TRUE	Low	QDMARLLREYQELMNTK		3	3	1	IPI:CON_00697851.1; CON_00139301.3; CON_00009867.3	2	2139.07	0.7	Low
	TRUE	Low	QNLEPLFEQYINNLR		4	5	2	CON_IPI00293665.9; CON_00300725.7; CON_00299145.9; CON_00009867.3	0	1890.97	0.7	Low
	TRUE	Low	TTAENEFVMLKK	1xDeamidated [N5]	3	3	2	IPI:CON_00697851.1; CON_00139301.3; CON_00009867.3	1	1411.71	0.69	Low
	TRUE	Low	TVRQNLEPLFEQYINNLR	3xDeamidated [N16; N/Q]	4	5	7	CON_IPI00293665.9; CON_00300725.7; CON_00299145.9; CON_00009867.3	1	2250.14	0.67	Low
	TRUE	Low	MIQRLRAEIDNVK	1xDeamidated [Q/N]	1	1	2	CON_00009867.3	2	1586.87	0.65	Low
	TRUE	Low	AEIDNVKK	1xDeamidated [N5]	1	1	2	CON_00009867.3	1	917.494	0.64	Low
	TRUE	Low	HEISEMNRMIQR	1xDeamidated [Q/N]	3	3	4	IPI:CON_00697851.1; CON_00139301.3; CON_00009867.3	1	1544.73	0.63	Low
	TRUE	Low	QDMARLLREYQELMNTK	2xOxidation [M3; M14]	3	3	1	IPI:CON_00697851.1; CON_00139301.3; CON_00009867.3	2	2171.06	0.63	Low
	TRUE	Low	TTAENEFVMLKKDVDAAYMNK		3	3	1	IPI:CON_00697851.1; CON_00139301.3; CON_00009867.3	2	2418.17	0.63	Low
	TRUE	Low	KDVDAAYMNKVELEAK	1xOxidation [M8]	3	3	2	CON_IPI00005859.3; IPI:CON_00697851.1; CON_00009867.3	2	1839.92	0.61	Low
	TRUE	Low	QNLEPLFEQYINNLRRQLDSIVGER	3xDeamidated [N13; Q/N]	3	4	3	CON_00300725.7; CON_00299145.9; CON_00009867.3	2	3047.54	0.6	Low
	TRUE	Low	WTLLQEQGTK	2xDeamidated [Q5; Q7]	4	5	1	CON_IPI00293665.9; CON_00300725.7; CON_00299145.9; CON_00009867.3	0	1205.6	0.59	Low
	TRUE	Low	VRFLEQQNK	2xDeamidated [Q6; N8]	28	29	2	IPI:CON_104456; CON_IPI00847342.1; CON_IPI00290857.2; IPI:CON_105456; CON_00124800.2; CON_IPI00005859.3; CON_IPI00293665.9; CON_00300725.7; CON_IPI00241841.9; CON_00131368.3; IPI:CON_106456; CON_00221797.1; CON_00124499.2; IPI:CON_00697851.1; CON_00299145.9; CON_00420312.4; IPI:CON_130456; CON_IPI00008359.1; IPI:CON_107456; CON_IPI00787323.2; CON_IPI00306959.10; CON_00166205.2; CON_IPI00406377.3;…	1	1163.61	0.59	Low
	TRUE	Low	KQCANLQNAIADAEQR	3xDeamidated [Q2; Q7; Q15]; 1xC29H38O4 [C3]	2	2	1	IPI:CON_00697851.1; CON_00009867.3	1	2226.1	0.57	Low
	TRUE	Low	VSLAGACGVGGYGSRSLYNLGGSKR	1xC29H38O4 [C7]	1	1	1	CON_00009867.3	2	2879.51	0.56	Low
	TRUE	Low	WTLLQEQGTK		4	5	3	CON_IPI00293665.9; CON_00300725.7; CON_00299145.9; CON_00009867.3	0	1203.64	0.55	Low
	TRUE	Low	QNLEPLFEQYINNLR	3xDeamidated [N12; N13; Q/N]	4	5	4	CON_IPI00293665.9; CON_00300725.7; CON_00299145.9; CON_00009867.3	0	1893.92	0.54	Low
	TRUE	Low	LAELEEALQKAKQDMAR	1xOxidation [M15]	1	1	1	CON_00009867.3	2	1960.02	0.53	Low
	TRUE	Low	VLDTKWTLLQEQGTKTVR	1xDeamidated [Q]	3	4	2	CON_IPI00293665.9; CON_00299145.9; CON_00009867.3	2	2117.16	0.53	Low
	TRUE	Low	MFFDAELSQMQTHVSDTSVVLSMDNNR	3xOxidation [M1; M10; M23]	3	3	1	IPI:CON_00697851.1; CON_00139301.3; CON_00009867.3	0	3150.38	0.53	Low
	TRUE	Low	WTLLQEQGTK	1xDeamidated [Q]	4	5	2	CON_IPI00293665.9; CON_00300725.7; CON_00299145.9; CON_00009867.3	0	1204.62	0.53	Low
	TRUE	Low	NLDLDSIIAEVKAQYEEIANRSR		1	1	1	CON_00009867.3	2	2647.37	0.51	Low
	TRUE	Low	KDVDAAYMNKVELEAK	1xDeamidated [N9]	3	3	1	CON_IPI00005859.3; IPI:CON_00697851.1; CON_00009867.3	2	1824.9	0.51	Low
	TRUE	Low	KQCANLQNAIADAEQR	3xDeamidated [Q2; N5; N8]	2	2	1	IPI:CON_00697851.1; CON_00009867.3	1	1775.82	0.49	Low
	TRUE	Low	TTAENEFVMLKK		3	3	3	IPI:CON_00697851.1; CON_00139301.3; CON_00009867.3	1	1410.73	0.49	Low
	TRUE	Low	TLNNKFASFIDK	1xDeamidated [N]	24	25	7	CON_IPI00847342.1; CON_IPI00290857.2; CON_00622240.4; IPI:CON_105456; CON_IPI00005859.3; CON_IPI00293665.9; CON_00300725.7; CON_IPI00241841.9; CON_00131368.3; CON_00221797.1; CON_00124499.2; IPI:CON_00697851.1; CON_00299145.9; CON_00420312.4; IPI:CON_130456; CON_00021304.1; CON_IPI00017870.1; CON_00462140.1; CON_IPI00008359.1; CON_IPI00306959.10; CON_IPI00406377.3; CON_IPI00554648.3; CON_00139301…	1	1398.73	0.48	Low
	TRUE	Low	VRFLEQQNKVLDTK	3xDeamidated [Q6; Q7; N8]	6	7	1	CON_IPI00293665.9; CON_00131368.3; IPI:CON_00697851.1; CON_00299145.9; CON_00139301.3; CON_00009867.3	2	1720.91	0.48	Low
	TRUE	Low	KQCANLQNAIADAEQRGELALK	2xDeamidated [Q/N]	2	2	10	IPI:CON_00697851.1; CON_00009867.3	2	2386.2	0.47	Low
	TRUE	Low	LRAEIDNVKK	1xDeamidated [N7]	1	1	1	CON_00009867.3	2	1186.68	0.47	Low
	TRUE	Low	TTAENEFVMLK		3	3	1	IPI:CON_00697851.1; CON_00139301.3; CON_00009867.3	0	1282.63	0.47	Low
	TRUE	Low	WTLLQEQGTKTVRQNLEPLFEQYINNLR		4	5	1	CON_IPI00293665.9; CON_00300725.7; CON_00299145.9; CON_00009867.3	2	3431.81	0.45	Low
	TRUE	Low	LDSELRNMQDLVEDFKNK	1xDeamidated [Q9]	2	2	2	IPI:CON_00697851.1; CON_00009867.3	2	2195.06	0.44	Low
	TRUE	Low	MIQRLRAEIDNVK	2xDeamidated [Q3; N11]	1	1	1	CON_00009867.3	2	1587.85	0.42	Low
	TRUE	Low	KQCANLQNAIADAEQR		2	2	2	IPI:CON_00697851.1; CON_00009867.3	1	1772.87	0.42	Low
	TRUE	Low	YEELQQTAGRHGDDLRNTK		3	3	2	IPI:CON_00697851.1; CON_00139301.3; CON_00009867.3	2	2231.08	0.41	Low
	TRUE	Low	VELEAKVDALMDEINFMK		2	2	2	IPI:CON_00697851.1; CON_00009867.3	1	2095.04	0.41	Low
	TRUE	Low	RISISTSGGSFRNR		1	1	1	CON_00009867.3	2	1537.82	0.4	Low
	TRUE	Low	RISISTSGGSFR		1	1	1	CON_00009867.3	1	1267.68	0.36	Low
	TRUE	Low	QSSVSFRSGGSRSFSTASAITPSVSR		1	1	1	CON_00009867.3	2	2646.32	0.34	Low
	TRUE	Low	WTLLQEQGTKTVR	1xDeamidated [Q]	4	5	4	CON_IPI00293665.9; CON_00300725.7; CON_00299145.9; CON_00009867.3	1	1560.84	0.34	Low
	TRUE	Low	SLYNLGGSKRISISTSGGSFR	1xDeamidated [N4]	1	1	2	CON_00009867.3	2	2188.14	0.34	Low
	TRUE	Low	RTTAENEFVMLKK	1xOxidation [M10]	3	3	1	IPI:CON_00697851.1; CON_00139301.3; CON_00009867.3	2	1582.83	0.33	Low
	TRUE	Low	RTTAENEFVMLK	1xDeamidated [N6]; 1xOxidation [M10]	3	3	1	IPI:CON_00697851.1; CON_00139301.3; CON_00009867.3	1	1455.71	0.33	Low
	TRUE	Low	TTAENEFVMLKK	1xOxidation [M9]	3	3	2	IPI:CON_00697851.1; CON_00139301.3; CON_00009867.3	1	1426.72	0.32	Low
	TRUE	Low	GELALKDARNK	1xDeamidated [N10]	2	2	1	CON_00139301.3; CON_00009867.3	2	1215.67	0.32	Low
	TRUE	Low	RISISTSGGSFRNR	1xDeamidated [N13]	1	1	1	CON_00009867.3	2	1538.8	0.29	Low
	TRUE	Low	QCANLQNAIADAEQRGELALKDAR	2xDeamidated [N/Q]	2	2	2	IPI:CON_00697851.1; CON_00009867.3	2	2600.27	0.28	Low
	TRUE	Low	QSSVSFRSGGSR	1xDeamidated [Q1]	2	2	2	CON_00139301.3; CON_00009867.3	1	1255.6	0.27	Low
	TRUE	Low	TEAESWYQTKYEELQQTAGR	2xDeamidated [Q15; Q]	3	3	2	IPI:CON_00697851.1; CON_00139301.3; CON_00009867.3	1	2420.09	0.25	Low
	TRUE	Low	SFSTASAITPSVSR		2	2	1	IPI:CON_00697851.1; CON_00009867.3	0	1410.72	0.25	Low
	TRUE	Low	NTKHEISEMNRMIQR	2xOxidation [M9; M12]	3	3	1	IPI:CON_00697851.1; CON_00139301.3; CON_00009867.3	2	1918.92	0.25	Low
	TRUE	Low	QCANLQNAIADAEQRGELALKDAR	1xDeamidated [Q/N]; 1xC29H38O4 [C2]	2	2	4	IPI:CON_00697851.1; CON_00009867.3	2	3049.57	0.25	Low
	TRUE	Low	KQCANLQNAIADAEQRGELALK	3xDeamidated [Q2; Q/N]	2	2	3	IPI:CON_00697851.1; CON_00009867.3	2	2387.19	0.24	Low
	TRUE	Low	HEISEMNRMIQR	2xDeamidated [N7; Q11]; 2xOxidation [M6; M9]	3	3	1	IPI:CON_00697851.1; CON_00139301.3; CON_00009867.3	1	1577.7	0.24	Low
	TRUE	Low	WTLLQEQGTKTVR	2xDeamidated [Q5; Q7]	4	5	1	CON_IPI00293665.9; CON_00300725.7; CON_00299145.9; CON_00009867.3	1	1561.82	0.24	Low
	TRUE	Low	AQYEEIANR	2xDeamidated [Q2; N8]	1	1	1	CON_00009867.3	0	1095.5	0.24	Low
	TRUE	Low	LDSELRNMQDLVEDFKNK		2	2	1	IPI:CON_00697851.1; CON_00009867.3	2	2194.08	0.24	Low
	TRUE	Low	TEAESWYQTKYEELQQTAGRHGDDLR	2xDeamidated [Q15; Q]	3	3	2	IPI:CON_00697851.1; CON_00139301.3; CON_00009867.3	2	3113.41	0.23	Low
	TRUE	Low	KDVDAAYMNKVELEAK	1xDeamidated [N9]; 1xOxidation [M8]	3	3	1	CON_IPI00005859.3; IPI:CON_00697851.1; CON_00009867.3	2	1840.9	0.21	Low
	TRUE	Low	LLREYQELMNTK	2xDeamidated [Q6; N10]	3	3	1	IPI:CON_00697851.1; CON_00139301.3; CON_00009867.3	1	1539.77	0.2	Low
	TRUE	Low	DVDAAYMNK	1xDeamidated [N8]; 1xOxidation [M7]	10	11	1	CON_IPI00005859.3; CON_IPI00293665.9; CON_00300725.7; CON_00131368.3; CON_00347096.2; IPI:CON_00697851.1; CON_00299145.9; CON_IPI00103481.3; CON_00139301.3; CON_00009867.3	0	1043.43	0.19	Low
	TRUE	Low	AQYEEIANR	1xDeamidated [Q2]	1	1	1	CON_00009867.3	0	1094.51	0.19	Low
	TRUE	Low	HEISEMNRMIQRLR		3	3	1	IPI:CON_00697851.1; CON_00139301.3; CON_00009867.3	2	1812.93	0.18	Low
	TRUE	Low	VDALMDEINFMK	1xDeamidated [N9]; 1xOxidation [M]	3	3	2	IPI:CON_00697851.1; CON_00139301.3; CON_00009867.3	0	1442.65	0.18	Low
	TRUE	Low	KDVDAAYMNKVELEAK		3	3	1	CON_IPI00005859.3; IPI:CON_00697851.1; CON_00009867.3	2	1823.92	0.18	Low
	TRUE	Low	MIQRLR	1xDeamidated [Q3]	13	14	1	CON_IPI00290857.2; CON_IPI00005859.3; CON_IPI00293665.9; CON_00300725.7; CON_00131368.3; CON_00221797.1; IPI:CON_00697851.1; CON_00299145.9; CON_00420312.4; CON_IPI00008359.1; CON_IPI00290078.5; CON_00139301.3; CON_00009867.3	1	817.471	0.17	Low
	TRUE	Low	AKQDMAR	1xDeamidated [Q3]	10	10	1	CON_IPI00005859.3; CON_00131368.3; CON_00221797.1; IPI:CON_00697851.1; CON_IPI00787323.2; CON_IPI00306959.10; CON_00660358.2; CON_IPI00554648.3; CON_00139301.3; CON_00009867.3	1	820.398	0.17	Low
	TRUE	Low	DVDAAYMNKVELEAK	1xDeamidated [N8]; 1xOxidation [M7]	3	3	1	CON_IPI00005859.3; IPI:CON_00697851.1; CON_00009867.3	1	1712.8	0.16	Low
	TRUE	Low	TLNNKFASFIDK	2xDeamidated [N3; N4]	24	25	2	CON_IPI00847342.1; CON_IPI00290857.2; CON_00622240.4; IPI:CON_105456; CON_IPI00005859.3; CON_IPI00293665.9; CON_00300725.7; CON_IPI00241841.9; CON_00131368.3; CON_00221797.1; CON_00124499.2; IPI:CON_00697851.1; CON_00299145.9; CON_00420312.4; IPI:CON_130456; CON_00021304.1; CON_IPI00017870.1; CON_00462140.1; CON_IPI00008359.1; CON_IPI00306959.10; CON_IPI00406377.3; CON_IPI00554648.3; CON_00139301…	1	1399.71	0.15	Low
	TRUE	Low	TLNNKFASFIDKVR	2xDeamidated [N3; N4]	23	24	1	CON_IPI00847342.1; CON_IPI00290857.2; CON_00622240.4; IPI:CON_105456; CON_IPI00005859.3; CON_IPI00293665.9; CON_00300725.7; CON_IPI00241841.9; CON_00131368.3; CON_00221797.1; CON_00124499.2; IPI:CON_00697851.1; CON_00299145.9; CON_00420312.4; IPI:CON_130456; CON_00021304.1; CON_00462140.1; CON_IPI00008359.1; CON_IPI00306959.10; CON_IPI00406377.3; CON_IPI00554648.3; CON_00139301.3; CON_00009867.3	2	1654.88	0.15	Low
	TRUE	Low	MSRQSSVSFR	1xOxidation [M1]	2	2	1	CON_00139301.3; CON_00009867.3	1	1200.58	0.13	Low
	TRUE	Low	GRLDSELR		8	9	1	CON_IPI00293665.9; CON_00300725.7; CON_IPI00241841.9; CON_00131368.3; IPI:CON_00697851.1; CON_00299145.9; CON_00139301.3; CON_00009867.3	1	945.511	0.12	Low
	TRUE	Low	VLDTKWTLLQEQGTKTVR		3	4	1	CON_IPI00293665.9; CON_00299145.9; CON_00009867.3	2	2116.18	0.12	Low
	TRUE	Low	LLREYQELMNTK		3	3	1	IPI:CON_00697851.1; CON_00139301.3; CON_00009867.3	1	1537.8	0.12	Low
	TRUE	Low	AEIDNVKKQCANLQNAIADAEQR	1xC29H38O4 [C10]	1	1	1	CON_00009867.3	2	2992.54	0.08	Low
	TRUE	Low	QLDSIVGERGRLDSELR		3	4	1	CON_00300725.7; CON_00299145.9; CON_00009867.3	2	1943.03	0.08	Low
	TRUE	Low	YEDEINKR	1xDeamidated [N6]	20	21	1	CON_IPI00748057.2; CON_IPI00290857.2; CON_00622240.4; CON_IPI00376379.3; CON_IPI00005859.3; CON_IPI00293665.9; CON_00300725.7; IPI:CON_00714876.1; CON_00131368.3; CON_00221797.1; CON_00124499.2; IPI:CON_00697851.1; CON_00299145.9; CON_00021304.1; CON_00462140.1; CON_IPI00008359.1; CON_00220327.3; CON_IPI00554648.3; CON_00139301.3; CON_00009867.3	1	1067.5	0.08	Low
	TRUE	Low	NTKHEISEMNRMIQR	3xDeamidated [N1; N10; Q14]; 1xOxidation [M12]	3	3	1	IPI:CON_00697851.1; CON_00139301.3; CON_00009867.3	2	1905.88	0.07	Low
	TRUE	Low	NMQDLVEDFKNK	3xDeamidated [N1; Q3; N11]; 1xOxidation [M2]	2	2	1	IPI:CON_00697851.1; CON_00009867.3	1	1499.66	0.05	Low
	TRUE	Low	TTAENEFVMLKKDVDAAYMNK	1xDeamidated [N20]; 2xOxidation [M9; M19]	3	3	1	IPI:CON_00697851.1; CON_00139301.3; CON_00009867.3	2	2451.14	0.04	Low
	TRUE	Low	NKYEDEINK	2xDeamidated [N1; N8]	14	15	1	CON_IPI00748057.2; CON_IPI00293665.9; CON_00300725.7; CON_IPI00241841.9; CON_00124499.2; IPI:CON_00697851.1; CON_00299145.9; CON_IPI00017870.1; CON_00462140.1; CON_00220327.3; CON_IPI00787323.2; CON_IPI00554648.3; CON_00139301.3; CON_00009867.3	1	1154.52	0.03	Low
TRUE	Master Protein	CON_00622240.4	Keratin, type II cytoskeletal 2 epidermal	66.3366	63	164	53	1	707	70.9	8.06	31.2	63
	Checked	Confidence	Sequence	Modifications	# Protein Groups	# Proteins	# PSMs	Master Protein Accessions	# Missed Cleavages	Theo. MH+ [Da]	XCorr Sequest HT	Confidence Sequest HT
	TRUE	High	TLNNKFASFIDKVR		23	24	3	CON_IPI00847342.1; CON_IPI00290857.2; CON_00622240.4; IPI:CON_105456; CON_IPI00005859.3; CON_IPI00293665.9; CON_00300725.7; CON_IPI00241841.9; CON_00131368.3; CON_00221797.1; CON_00124499.2; IPI:CON_00697851.1; CON_00299145.9; CON_00420312.4; IPI:CON_130456; CON_00021304.1; CON_00462140.1; CON_IPI00008359.1; CON_IPI00306959.10; CON_IPI00406377.3; CON_IPI00554648.3; CON_00139301.3; CON_00009867.3	2	1652.91	4.51	High
	TRUE	High	GFSSGSAVVSGGSR		2	2	1	CON_00622240.4; CON_00021304.1	0	1254.61	3.96	High
	TRUE	High	LLRDYQELMNTK	1xOxidation [M9]	3	3	3	CON_00622240.4; IPI:CON_00714876.1; CON_00220327.3	1	1539.78	3.4	High
	TRUE	High	FASFIDKVR		31	32	1	CON_IPI00847342.1; CON_IPI00329306.3; CON_IPI00290857.2; CON_00622240.4; CON_IPI00174775.2; CON_00468956.4; IPI:CON_105456; CON_00347110.2; CON_IPI00376379.3; CON_IPI00005859.3; CON_IPI00293665.9; CON_00300725.7; CON_IPI00241841.9; CON_00131368.3; CON_00347096.2; CON_00221797.1; CON_00124499.2; IPI:CON_00697851.1; CON_00299145.9; CON_00420312.4; IPI:CON_130456; CON_00021304.1; CON_00462140.1; CON…	1	1082.6	2.64	High
	TRUE	High	LLRDYQELMNTK		3	3	2	CON_00622240.4; IPI:CON_00714876.1; CON_00220327.3	1	1523.79	2.56	High
	TRUE	High	GFSSGSAVVSGGSRR		2	2	2	CON_00622240.4; CON_00021304.1	1	1410.71	2.48	High
	TRUE	High	VDPEIQNVK		2	2	1	CON_00622240.4; CON_00021304.1	0	1041.56	1.96	High
	TRUE	Medium	LDILAQEVNFLR	2xDeamidated [Q6; N9]	1	1	1	CON_00622240.4	0	1432.77	1.41	Medium
	TRUE	Medium	DYQELMNTK	1xOxidation [M6]	3	3	1	CON_00622240.4; IPI:CON_00714876.1; CON_00220327.3	0	1157.51	1.31	Medium
	TRUE	Medium	VDPEIQNVKSQEREQIK	2xDeamidated [Q6; Q11]	1	1	4	CON_00622240.4	2	2042.04	1.29	Medium
	TRUE	Medium	VDPEIQNVKSQER	1xDeamidated [Q11]	1	1	9	CON_00622240.4	1	1542.78	1.1	Medium
	TRUE	Medium	KQVDRLSAER	1xDeamidated [Q2]	1	1	2	CON_00622240.4	2	1202.65	0.81	Medium
	TRUE	Low	LLRDYQELMNTKLSLDVEIATYR	1xOxidation [M9]	1	1	1	CON_00622240.4	2	2800.45	1.09	Low
	TRUE	Low	LLRDYQELMNTKLSLDVEIATYR	2xDeamidated [Q6; N10]	1	1	2	CON_00622240.4	2	2786.43	1.05	Low
	TRUE	Low	LTDLEEALQQCREDLARLLR	2xDeamidated [Q9; Q10]; 1xC29H38O4 [C11]	1	1	1	CON_00622240.4	2	2837.5	1.01	Low
	TRUE	Low	WELLQQLDVGSRTTNLDPIFQAYIGMLKK	1xDeamidated [Q]; 1xOxidation [M26]	1	1	2	CON_00622240.4	2	3394.77	1	Low
	TRUE	Low	TGFGSGGQSSGGRGSYGGR	1xDeamidated [Q8]	1	1	2	CON_00622240.4	1	1732.76	0.91	Low
	TRUE	Low	YEELQVTAVKHGDSLK		1	1	4	CON_00622240.4	1	1816.94	0.85	Low
	TRUE	Low	VRFLEQQNQVLRTK	2xDeamidated [Q/N]	1	1	2	CON_00622240.4	2	1760.97	0.83	Low
	TRUE	Low	KLLEGEECRMSGDFSDNVSVSITSSTISSSVASK	1xDeamidated [N17]; 1xOxidation [M10]; 1xC29H38O4 [C8]	1	1	1	CON_00622240.4	2	4017.94	0.83	Low
	TRUE	Low	LDILAQEVNFLRTLYDAELSQLQQDVTDTNVILSMDNNR	3xDeamidated [Q6; Q21; N38]; 1xOxidation [M35]	1	1	1	CON_00622240.4	1	4527.21	0.83	Low
	TRUE	Low	MSCQISCRSRR	1xDeamidated [Q4]; 2xC29H38O4 [C3; C7]	1	1	1	CON_00622240.4	2	2228.16	0.82	Low
	TRUE	Low	TTNLDPIFQAYIGMLKKQVDR	2xDeamidated [Q9; Q18]	1	1	1	CON_00622240.4	2	2453.27	0.77	Low
	TRUE	Low	VDPEIQNVKSQER	3xDeamidated [Q6; N7; Q11]	1	1	7	CON_00622240.4	1	1544.74	0.76	Low
	TRUE	Low	LDILAQEVNFLRTLYDAELSQLQQDVTDTNVILSMDNNR	2xDeamidated [Q6; Q21]; 1xOxidation [M35]	1	1	2	CON_00622240.4	1	4526.22	0.74	Low
	TRUE	Low	LQGEISHVK		1	1	1	CON_00622240.4	0	1010.56	0.7	Low
	TRUE	Low	KQCKGVQDSIADAEQR	1xDeamidated [Q]	1	1	5	CON_00622240.4	2	1776.85	0.69	Low
	TRUE	Low	TGFGSGGQSSGGR	1xDeamidated [Q8]	1	1	1	CON_00622240.4	0	1155.5	0.68	Low
	TRUE	Low	VDPEIQNVKSQER	2xDeamidated [Q6; Q11]	1	1	1	CON_00622240.4	1	1543.76	0.64	Low
	TRUE	Low	NLDLDSIIAEVQNQYEMIAHKSK		1	1	1	CON_00622240.4	1	2659.34	0.62	Low
	TRUE	Low	DVDSCYMDKTELQARLDILAQEVNFLR	1xDeamidated [Q/N]	1	1	2	CON_00622240.4	2	3186.54	0.57	Low
	TRUE	Low	LQGEISHVKK	1xDeamidated [Q2]	1	1	1	CON_00622240.4	1	1139.64	0.55	Low
	TRUE	Low	EIKMEISELNRTIQR	2xDeamidated [N10; Q14]	1	1	3	CON_00622240.4	2	1861.97	0.51	Low
	TRUE	Low	TKWELLQQLDVGSR	1xDeamidated [Q]	1	1	2	CON_00622240.4	1	1673.89	0.51	Low
	TRUE	Low	TLYDAELSQLQQDVTDTNVILSMDNNR	1xDeamidated [N]; 1xOxidation [M23]	1	1	3	CON_00622240.4	0	3113.46	0.5	Low
	TRUE	Low	TSAENDFVTIKK	1xDeamidated [N5]	1	1	2	CON_00622240.4	1	1353.69	0.5	Low
	TRUE	Low	WELLQQLDVGSR	1xDeamidated [Q6]	1	1	1	CON_00622240.4	0	1444.74	0.49	Low
	TRUE	Low	TLNNKFASFIDK	1xDeamidated [N]	24	25	7	CON_IPI00847342.1; CON_IPI00290857.2; CON_00622240.4; IPI:CON_105456; CON_IPI00005859.3; CON_IPI00293665.9; CON_00300725.7; CON_IPI00241841.9; CON_00131368.3; CON_00221797.1; CON_00124499.2; IPI:CON_00697851.1; CON_00299145.9; CON_00420312.4; IPI:CON_130456; CON_00021304.1; CON_IPI00017870.1; CON_00462140.1; CON_IPI00008359.1; CON_IPI00306959.10; CON_IPI00406377.3; CON_IPI00554648.3; CON_00139301…	1	1398.73	0.48	Low
	TRUE	Low	GGSGGGGFGSQSLVGLGGYK		1	1	2	CON_00622240.4	0	1741.85	0.48	Low
	TRUE	Low	TTNLDPIFQAYIGMLKKQVDR	1xDeamidated [N/Q]	1	1	2	CON_00622240.4	2	2452.29	0.48	Low
	TRUE	Low	EIKMEISELNRTIQR	1xDeamidated [N10]; 1xOxidation [M4]	1	1	1	CON_00622240.4	2	1876.98	0.47	Low
	TRUE	Low	LTDLEEALQQCR	2xDeamidated [Q9; Q10]; 1xC29H38O4 [C11]	1	1	1	CON_00622240.4	0	1870.94	0.47	Low
	TRUE	Low	KQCKGVQDSIADAEQR	1xDeamidated [Q]; 1xC29H38O4 [C3]	1	1	6	CON_00622240.4	2	2227.13	0.46	Low
	TRUE	Low	AESEELYHSKYEELQVTAVKHGDSLK	1xDeamidated [Q15]	1	1	2	CON_00622240.4	2	2991.46	0.46	Low
	TRUE	Low	SQEREQIKTLNNK	2xDeamidated [Q2; Q6]	1	1	1	CON_00622240.4	2	1589.81	0.46	Low
	TRUE	Low	TSAENDFVTIKK		1	1	1	CON_00622240.4	1	1352.71	0.44	Low
	TRUE	Low	KYEDEINKR		5	5	1	CON_IPI00290857.2; CON_00622240.4; IPI:CON_00714876.1; CON_00021304.1; CON_IPI00008359.1	2	1194.61	0.43	Low
	TRUE	Low	QCKGVQDSIADAEQR	1xC29H38O4 [C2]	1	1	1	CON_00622240.4	1	2098.05	0.41	Low
	TRUE	Low	FLEQQNQVLR		1	1	1	CON_00622240.4	0	1274.69	0.41	Low
	TRUE	Low	GGGGGGGSTYGSGGR		1	1	3	CON_00622240.4	0	1183.51	0.39	Low
	TRUE	Low	LTDLEEALQQCR	1xDeamidated [Q]; 1xC29H38O4 [C11]	1	1	5	CON_00622240.4	0	1869.95	0.39	Low
	TRUE	Low	EIKMEISELNRTIQR	2xDeamidated [N10; Q14]; 1xOxidation [M4]	1	1	1	CON_00622240.4	2	1877.96	0.39	Low
	TRUE	Low	DVDSCYMDKTELQAR	1xOxidation [M7]	1	1	1	CON_00622240.4	1	1789.77	0.38	Low
	TRUE	Low	TTNLDPIFQAYIGMLK	2xDeamidated [N3; Q9]; 1xOxidation [M14]	1	1	1	CON_00622240.4	0	1842.92	0.38	Low
	TRUE	Low	SNTSFSCISRHGGGR	1xDeamidated [N2]	1	1	7	CON_00622240.4	1	1566.71	0.37	Low
	TRUE	Low	KDVDSCYMDK	1xOxidation [M8]; 1xC29H38O4 [C6]	1	1	2	CON_00622240.4	1	1669.77	0.36	Low
	TRUE	Low	KQVDRLSAER		1	1	1	CON_00622240.4	2	1201.66	0.35	Low
	TRUE	Low	QCKGVQDSIADAEQR		1	1	1	CON_00622240.4	1	1647.78	0.35	Low
	TRUE	Low	NLDLDSIIAEVQNQYEMIAHKSK	3xDeamidated [N1; Q12; N13]	1	1	1	CON_00622240.4	1	2662.29	0.28	Low
	TRUE	Low	DARGKLTDLEEALQQCR		1	1	2	CON_00622240.4	2	1945.98	0.27	Low
	TRUE	Low	GVQDSIADAEQRGEHAIK	1xDeamidated [Q]	1	1	2	CON_00622240.4	1	1924.94	0.26	Low
	TRUE	Low	MSCQISCRSR	1xOxidation [M1]; 1xC29H38O4 [C3]	1	1	1	CON_00622240.4	1	1636.79	0.26	Low
	TRUE	Low	DVDSCYMDKTELQAR	1xOxidation [M7]; 1xC29H38O4 [C5]	1	1	1	CON_00622240.4	1	2240.05	0.25	Low
	TRUE	Low	GKLTDLEEALQQCREDLAR	2xDeamidated [Q11; Q12]	1	1	1	CON_00622240.4	2	2190.07	0.24	Low
	TRUE	Low	RSNTSFSCISRHGGGR	1xDeamidated [N3]; 1xC29H38O4 [C8]	1	1	2	CON_00622240.4	2	2173.09	0.24	Low
	TRUE	Low	EIKMEISELNR		1	1	1	CON_00622240.4	1	1361.71	0.23	Low
	TRUE	Low	TLYDAELSQLQQDVTDTNVILSMDNNR	3xDeamidated [N18; N25; N26]	1	1	1	CON_00622240.4	0	3099.43	0.23	Low
	TRUE	Low	SQEREQIK	1xDeamidated [Q2]	1	1	1	CON_00622240.4	1	1018.52	0.22	Low
	TRUE	Low	KYEDEINKR	1xDeamidated [N7]	5	5	1	CON_IPI00290857.2; CON_00622240.4; IPI:CON_00714876.1; CON_00021304.1; CON_IPI00008359.1	2	1195.6	0.2	Low
	TRUE	Low	FLEQQNQVLRTK	1xDeamidated [Q4]	1	1	1	CON_00622240.4	1	1504.81	0.19	Low
	TRUE	Low	TIQRLQGEISHVK		1	1	1	CON_00622240.4	1	1508.85	0.19	Low
	TRUE	Low	LLEGEECRMSGDFSDNVSVSITSSTISSSVASK	1xDeamidated [N16]; 1xOxidation [M9]; 1xC29H38O4 [C7]	1	1	1	CON_00622240.4	1	3889.85	0.18	Low
	TRUE	Low	HGGGRGGSGGGGFGSQSLVGLGGYK	1xDeamidated [Q16]	1	1	1	CON_00622240.4	1	2207.06	0.16	Low
	TRUE	Low	TTNLDPIFQAYIGMLK	1xOxidation [M14]	1	1	1	CON_00622240.4	0	1840.95	0.16	Low
	TRUE	Low	MEISELNRTIQR	2xDeamidated [N7; Q11]; 1xOxidation [M1]	1	1	1	CON_00622240.4	1	1507.74	0.16	Low
	TRUE	Low	GGSGGGYGSGGGSGSGGGYSSGGGSR		1	1	1	CON_00622240.4	0	2022.81	0.15	Low
	TRUE	Low	TLNNKFASFIDK	2xDeamidated [N3; N4]	24	25	2	CON_IPI00847342.1; CON_IPI00290857.2; CON_00622240.4; IPI:CON_105456; CON_IPI00005859.3; CON_IPI00293665.9; CON_00300725.7; CON_IPI00241841.9; CON_00131368.3; CON_00221797.1; CON_00124499.2; IPI:CON_00697851.1; CON_00299145.9; CON_00420312.4; IPI:CON_130456; CON_00021304.1; CON_IPI00017870.1; CON_00462140.1; CON_IPI00008359.1; CON_IPI00306959.10; CON_IPI00406377.3; CON_IPI00554648.3; CON_00139301…	1	1399.71	0.15	Low
	TRUE	Low	GKLTDLEEALQQCR	2xDeamidated [Q11; Q12]	1	1	1	CON_00622240.4	1	1605.78	0.15	Low
	TRUE	Low	TLNNKFASFIDKVR	2xDeamidated [N3; N4]	23	24	1	CON_IPI00847342.1; CON_IPI00290857.2; CON_00622240.4; IPI:CON_105456; CON_IPI00005859.3; CON_IPI00293665.9; CON_00300725.7; CON_IPI00241841.9; CON_00131368.3; CON_00221797.1; CON_00124499.2; IPI:CON_00697851.1; CON_00299145.9; CON_00420312.4; IPI:CON_130456; CON_00021304.1; CON_00462140.1; CON_IPI00008359.1; CON_IPI00306959.10; CON_IPI00406377.3; CON_IPI00554648.3; CON_00139301.3; CON_00009867.3	2	1654.88	0.15	Low
	TRUE	Low	MSCQISCRSRR	1xOxidation [M1]; 1xC29H38O4 [C3]	1	1	1	CON_00622240.4	2	1792.89	0.12	Low
	TRUE	Low	TELQAR	1xDeamidated [Q4]	1	1	1	CON_00622240.4	0	718.373	0.08	Low
	TRUE	Low	YEDEINKR	1xDeamidated [N6]	20	21	1	CON_IPI00748057.2; CON_IPI00290857.2; CON_00622240.4; CON_IPI00376379.3; CON_IPI00005859.3; CON_IPI00293665.9; CON_00300725.7; IPI:CON_00714876.1; CON_00131368.3; CON_00221797.1; CON_00124499.2; IPI:CON_00697851.1; CON_00299145.9; CON_00021304.1; CON_00462140.1; CON_IPI00008359.1; CON_00220327.3; CON_IPI00554648.3; CON_00139301.3; CON_00009867.3	1	1067.5	0.08	Low
	TRUE	Low	WELLQQLDVGSRTTNLDPIFQAYIGMLKK	2xDeamidated [Q5; Q6]; 1xOxidation [M26]	1	1	1	CON_00622240.4	2	3395.76	0.07	Low
	TRUE	Low	DARGKLTDLEEALQQCR	2xDeamidated [Q14; Q15]	1	1	2	CON_00622240.4	2	1947.94	0.06	Low
	TRUE	Low	TSQESELNNMQDLVEDFK	1xDeamidated [N/Q]; 1xOxidation [M10]	1	1	4	CON_00622240.4	0	2143.93	0.06	Low
	TRUE	Low	MSCQISCR		1	1	1	CON_00622240.4	0	927.385	0.06	Low
TRUE	Master Protein	CON_00139301.3	Keratin, type II cytoskeletal 5	70.5172	65	231	24	1	580	61.7	7.75	30.31	65
	Checked	Confidence	Sequence	Modifications	# Protein Groups	# Proteins	# PSMs	Master Protein Accessions	# Missed Cleavages	Theo. MH+ [Da]	XCorr Sequest HT	Confidence Sequest HT
	TRUE	High	SRTEAESWYQTKYEELQQTAGR		3	3	2	IPI:CON_00697851.1; CON_00139301.3; CON_00009867.3	2	2661.25	5.04	High
	TRUE	High	TLNNKFASFIDKVR		23	24	3	CON_IPI00847342.1; CON_IPI00290857.2; CON_00622240.4; IPI:CON_105456; CON_IPI00005859.3; CON_IPI00293665.9; CON_00300725.7; CON_IPI00241841.9; CON_00131368.3; CON_00221797.1; CON_00124499.2; IPI:CON_00697851.1; CON_00299145.9; CON_00420312.4; IPI:CON_130456; CON_00021304.1; CON_00462140.1; CON_IPI00008359.1; CON_IPI00306959.10; CON_IPI00406377.3; CON_IPI00554648.3; CON_00139301.3; CON_00009867.3	2	1652.91	4.51	High
	TRUE	High	SLDLDSIIAEVK		5	5	1	CON_00131368.3; CON_00221797.1; IPI:CON_00697851.1; CON_00220327.3; CON_00139301.3	0	1302.72	3.38	High
	TRUE	High	TEAESWYQTKYEELQQTAGR		3	3	1	IPI:CON_00697851.1; CON_00139301.3; CON_00009867.3	1	2418.12	3.08	High
	TRUE	High	NKYEDEINKR		11	12	5	CON_IPI00748057.2; CON_IPI00293665.9; CON_00300725.7; CON_00124499.2; IPI:CON_00697851.1; CON_00299145.9; CON_00462140.1; CON_00220327.3; CON_IPI00554648.3; CON_00139301.3; CON_00009867.3	2	1308.65	2.8	High
	TRUE	High	FASFIDKVR		31	32	1	CON_IPI00847342.1; CON_IPI00329306.3; CON_IPI00290857.2; CON_00622240.4; CON_IPI00174775.2; CON_00468956.4; IPI:CON_105456; CON_00347110.2; CON_IPI00376379.3; CON_IPI00005859.3; CON_IPI00293665.9; CON_00300725.7; CON_IPI00241841.9; CON_00131368.3; CON_00347096.2; CON_00221797.1; CON_00124499.2; IPI:CON_00697851.1; CON_00299145.9; CON_00420312.4; IPI:CON_130456; CON_00021304.1; CON_00462140.1; CON…	1	1082.6	2.64	High
	TRUE	Medium	LRSEIDNVKK		3	3	1	IPI:CON_00697851.1; CON_00220327.3; CON_00139301.3	2	1201.69	2.11	Medium
	TRUE	Medium	YEELQQTAGR		3	3	1	IPI:CON_00697851.1; CON_00139301.3; CON_00009867.3	0	1194.57	1.66	Medium
	TRUE	Medium	FLEQQNK		28	29	2	IPI:CON_104456; CON_IPI00847342.1; CON_IPI00290857.2; IPI:CON_105456; CON_00124800.2; CON_IPI00005859.3; CON_IPI00293665.9; CON_00300725.7; CON_IPI00241841.9; CON_00131368.3; IPI:CON_106456; CON_00221797.1; CON_00124499.2; IPI:CON_00697851.1; CON_00299145.9; CON_00420312.4; IPI:CON_130456; CON_IPI00008359.1; IPI:CON_107456; CON_IPI00787323.2; CON_IPI00306959.10; CON_00166205.2; CON_IPI00406377.3;…	0	906.468	1.56	Medium
	TRUE	Medium	TIKQNLDPLFEQYINNLR	2xDeamidated [Q4; N16]	1	1	11	CON_00139301.3	1	2221.15	1.18	Medium
	TRUE	Medium	MIQRLRSEIDNVK	2xDeamidated [Q3; N11]; 1xOxidation [M1]	2	2	5	IPI:CON_00697851.1; CON_00139301.3	2	1619.84	1.05	Medium
	TRUE	Low	KQCANLQNAIAEAEQRGELALK	2xDeamidated [Q/N]	1	1	5	CON_00139301.3	2	2400.22	1.12	Low
	TRUE	Low	SLYNVGGSKRISYSSGGGSFR		1	1	10	CON_00139301.3	2	2179.09	1.03	Low
	TRUE	Low	YEDEINKRTTAENEFVMLK	2xDeamidated [N6; N13]; 1xOxidation [M17]	3	3	3	IPI:CON_00697851.1; CON_00139301.3; CON_00009867.3	2	2348.1	0.99	Low
	TRUE	Low	RQLDGVLGER		1	1	2	CON_00139301.3	1	1142.63	0.93	Low
	TRUE	Low	NKLTELEEALQK	1xDeamidated [Q/N]	1	1	2	CON_00139301.3	1	1416.76	0.91	Low
	TRUE	Low	GGGGLGLGSGLSVGGSGFSAGSSQGGMSFGSGGGSGSSVKFVSTTSSSRR	1xOxidation [M27]	1	1	1	CON_00139301.3	2	4417.07	0.91	Low
	TRUE	Low	ISLGGACGAGGYGSRSLYNVGGSKR	1xDeamidated [N19]	1	1	2	CON_00139301.3	2	2388.17	0.86	Low
	TRUE	Low	KQCANLQNAIAEAEQR	1xDeamidated [N/Q]; 1xC29H38O4 [C3]	1	1	3	CON_00139301.3	1	2238.15	0.78	Low
	TRUE	Low	KQCANLQNAIAEAEQR	2xDeamidated [N/Q]; 1xC29H38O4 [C3]	1	1	5	CON_00139301.3	1	2239.13	0.77	Low
	TRUE	Low	SLYNVGGSKRISYSSGGGSFR	1xDeamidated [N4]	1	1	3	CON_00139301.3	2	2180.07	0.76	Low
	TRUE	Low	KQCANLQNAIAEAEQR	2xDeamidated [N/Q]	1	1	2	CON_00139301.3	1	1788.85	0.71	Low
	TRUE	Low	LTELEEALQKAKQDMAR	1xOxidation [M15]	1	1	3	CON_00139301.3	2	1990.03	0.71	Low
	TRUE	Low	QDMARLLREYQELMNTK		3	3	1	IPI:CON_00697851.1; CON_00139301.3; CON_00009867.3	2	2139.07	0.7	Low
	TRUE	Low	QCANLQNAIAEAEQRGELALK	1xC29H38O4 [C2]	1	1	1	CON_00139301.3	1	2720.43	0.7	Low
	TRUE	Low	TTAENEFVMLKK	1xDeamidated [N5]	3	3	2	IPI:CON_00697851.1; CON_00139301.3; CON_00009867.3	1	1411.71	0.69	Low
	TRUE	Low	QCANLQNAIAEAEQRGELALKDAR	1xDeamidated [Q/N]; 1xC29H38O4 [C2]	1	1	3	CON_00139301.3	2	3063.58	0.67	Low
	TRUE	Low	KQCANLQNAIAEAEQR	3xDeamidated [Q2; N8; N/Q]; 1xC29H38O4 [C3]	1	1	2	CON_00139301.3	1	2240.11	0.65	Low
	TRUE	Low	HEISEMNRMIQR	1xDeamidated [Q/N]	3	3	4	IPI:CON_00697851.1; CON_00139301.3; CON_00009867.3	1	1544.73	0.63	Low
	TRUE	Low	QDMARLLREYQELMNTK	2xOxidation [M3; M14]	3	3	1	IPI:CON_00697851.1; CON_00139301.3; CON_00009867.3	2	2171.06	0.63	Low
	TRUE	Low	TTAENEFVMLKKDVDAAYMNK		3	3	1	IPI:CON_00697851.1; CON_00139301.3; CON_00009867.3	2	2418.17	0.63	Low
	TRUE	Low	MIQRLRSEIDNVK	1xDeamidated [Q/N]; 1xOxidation [M1]	2	2	13	IPI:CON_00697851.1; CON_00139301.3	2	1618.86	0.6	Low
	TRUE	Low	VRFLEQQNK	2xDeamidated [Q6; N8]	28	29	2	IPI:CON_104456; CON_IPI00847342.1; CON_IPI00290857.2; IPI:CON_105456; CON_00124800.2; CON_IPI00005859.3; CON_IPI00293665.9; CON_00300725.7; CON_IPI00241841.9; CON_00131368.3; IPI:CON_106456; CON_00221797.1; CON_00124499.2; IPI:CON_00697851.1; CON_00299145.9; CON_00420312.4; IPI:CON_130456; CON_IPI00008359.1; IPI:CON_107456; CON_IPI00787323.2; CON_IPI00306959.10; CON_00166205.2; CON_IPI00406377.3;…	1	1163.61	0.59	Low
	TRUE	Low	QCANLQNAIAEAEQRGELALK	1xDeamidated [Q14]; 1xC29H38O4 [C2]	1	1	1	CON_00139301.3	1	2721.42	0.59	Low
	TRUE	Low	QCANLQNAIAEAEQRGELALKDAR	2xDeamidated [N4; N7]; 1xC29H38O4 [C2]	1	1	1	CON_00139301.3	2	3064.57	0.57	Low
	TRUE	Low	SEIDNVKKQCANLQNAIAEAEQR	1xDeamidated [Q22]	1	1	1	CON_00139301.3	2	2573.26	0.56	Low
	TRUE	Low	QNLDPLFEQYINNLR	1xDeamidated [Q/N]	1	1	4	CON_00139301.3	0	1877.94	0.54	Low
	TRUE	Low	MFFDAELSQMQTHVSDTSVVLSMDNNR	3xOxidation [M1; M10; M23]	3	3	1	IPI:CON_00697851.1; CON_00139301.3; CON_00009867.3	0	3150.38	0.53	Low
	TRUE	Low	KQCANLQNAIAEAEQRGELALK	1xC29H38O4 [C3]	1	1	2	CON_00139301.3	2	2848.53	0.5	Low
	TRUE	Low	SFSAASAITPSVSRTSFSSVSR		1	1	3	CON_00139301.3	1	2232.13	0.5	Low
	TRUE	Low	TTAENEFVMLKK		3	3	3	IPI:CON_00697851.1; CON_00139301.3; CON_00009867.3	1	1410.73	0.49	Low
	TRUE	Low	TLNNKFASFIDK	1xDeamidated [N]	24	25	7	CON_IPI00847342.1; CON_IPI00290857.2; CON_00622240.4; IPI:CON_105456; CON_IPI00005859.3; CON_IPI00293665.9; CON_00300725.7; CON_IPI00241841.9; CON_00131368.3; CON_00221797.1; CON_00124499.2; IPI:CON_00697851.1; CON_00299145.9; CON_00420312.4; IPI:CON_130456; CON_00021304.1; CON_IPI00017870.1; CON_00462140.1; CON_IPI00008359.1; CON_IPI00306959.10; CON_IPI00406377.3; CON_IPI00554648.3; CON_00139301…	1	1398.73	0.48	Low
	TRUE	Low	VRFLEQQNKVLDTK	3xDeamidated [Q6; Q7; N8]	6	7	1	CON_IPI00293665.9; CON_00131368.3; IPI:CON_00697851.1; CON_00299145.9; CON_00139301.3; CON_00009867.3	2	1720.91	0.48	Low
	TRUE	Low	KQCANLQNAIAEAEQRGELALK		1	1	1	CON_00139301.3	2	2398.25	0.47	Low
	TRUE	Low	TTAENEFVMLK		3	3	1	IPI:CON_00697851.1; CON_00139301.3; CON_00009867.3	0	1282.63	0.47	Low
	TRUE	Low	VLDTKWALLQEQGTK	2xDeamidated [Q10; Q12]	3	3	1	CON_00131368.3; IPI:CON_00697851.1; CON_00139301.3	1	1731.92	0.45	Low
	TRUE	Low	QNLDPLFEQYINNLRR		1	1	1	CON_00139301.3	1	2033.06	0.45	Low
	TRUE	Low	KQCANLQNAIAEAEQR		1	1	5	CON_00139301.3	1	1786.89	0.45	Low
	TRUE	Low	VLDTKWALLQEQGTK	1xDeamidated [Q]	3	3	2	CON_00131368.3; IPI:CON_00697851.1; CON_00139301.3	1	1730.93	0.45	Low
	TRUE	Low	NMQDLVEDYKNK	1xDeamidated [N11]; 1xOxidation [M2]	1	1	1	CON_00139301.3	1	1513.68	0.41	Low
	TRUE	Low	YEELQQTAGRHGDDLRNTK		3	3	2	IPI:CON_00697851.1; CON_00139301.3; CON_00009867.3	2	2231.08	0.41	Low
	TRUE	Low	KDVDAAYMNKVELEAR		1	1	3	CON_00139301.3	2	1851.93	0.39	Low
	TRUE	Low	RTTAENEFVMLKK	1xOxidation [M10]	3	3	1	IPI:CON_00697851.1; CON_00139301.3; CON_00009867.3	2	1582.83	0.33	Low
	TRUE	Low	SGGGGGGRISLGGACGAGGYGSR	1xC29H38O4 [C15]	1	1	1	CON_00139301.3	1	2361.17	0.33	Low
	TRUE	Low	RTTAENEFVMLK	1xDeamidated [N6]; 1xOxidation [M10]	3	3	1	IPI:CON_00697851.1; CON_00139301.3; CON_00009867.3	1	1455.71	0.33	Low
	TRUE	Low	TTAENEFVMLKK	1xOxidation [M9]	3	3	2	IPI:CON_00697851.1; CON_00139301.3; CON_00009867.3	1	1426.72	0.32	Low
	TRUE	Low	GELALKDARNK	1xDeamidated [N10]	2	2	1	CON_00139301.3; CON_00009867.3	2	1215.67	0.32	Low
	TRUE	Low	KQCANLQNAIAEAEQRGELALK	1xDeamidated [Q/N]	1	1	9	CON_00139301.3	2	2399.23	0.31	Low
	TRUE	Low	QSSVSFRSGGSRSFSAASAITPSVSR		1	1	1	CON_00139301.3	2	2616.31	0.31	Low
	TRUE	Low	QNLDPLFEQYINNLR		1	1	1	CON_00139301.3	0	1876.96	0.29	Low
	TRUE	Low	LTELEEALQK		1	1	1	CON_00139301.3	0	1173.64	0.28	Low
	TRUE	Low	QSSVSFRSGGSR	1xDeamidated [Q1]	2	2	2	CON_00139301.3; CON_00009867.3	1	1255.6	0.27	Low
	TRUE	Low	TEAESWYQTKYEELQQTAGR	2xDeamidated [Q15; Q]	3	3	2	IPI:CON_00697851.1; CON_00139301.3; CON_00009867.3	1	2420.09	0.25	Low
	TRUE	Low	NTKHEISEMNRMIQR	2xOxidation [M9; M12]	3	3	1	IPI:CON_00697851.1; CON_00139301.3; CON_00009867.3	2	1918.92	0.25	Low
	TRUE	Low	RISYSSGGGSFR		1	1	2	CON_00139301.3	1	1273.63	0.25	Low
	TRUE	Low	HEISEMNRMIQR	2xDeamidated [N7; Q11]; 2xOxidation [M6; M9]	3	3	1	IPI:CON_00697851.1; CON_00139301.3; CON_00009867.3	1	1577.7	0.24	Low
	TRUE	Low	QLDGVLGERGRLDSELR		1	1	1	CON_00139301.3	2	1913.02	0.24	Low
	TRUE	Low	DARNKLTELEEALQK	1xDeamidated [Q/N]	1	1	3	CON_00139301.3	2	1758.92	0.24	Low
	TRUE	Low	KDVDAAYMNKVELEAR	1xDeamidated [N9]; 1xOxidation [M8]	1	1	1	CON_00139301.3	2	1868.91	0.24	Low
	TRUE	Low	KQCANLQNAIAEAEQRGELALK	3xDeamidated [Q2; Q/N]	1	1	6	CON_00139301.3	2	2401.2	0.23	Low
	TRUE	Low	TEAESWYQTKYEELQQTAGRHGDDLR	2xDeamidated [Q15; Q]	3	3	2	IPI:CON_00697851.1; CON_00139301.3; CON_00009867.3	2	3113.41	0.23	Low
	TRUE	Low	TIKQNLDPLFEQYINNLR	3xDeamidated [N16; Q/N]	1	1	3	CON_00139301.3	1	2222.13	0.23	Low
	TRUE	Low	LDSELRNMQDLVEDYK	1xOxidation [M8]	2	2	1	CON_IPI00103481.3; CON_00139301.3	1	1983.93	0.22	Low
	TRUE	Low	QNLDPLFEQYINNLR	2xDeamidated [N13; Q/N]	1	1	2	CON_00139301.3	0	1878.92	0.21	Low
	TRUE	Low	MFFDAELSQMQTHVSDTSVVLSMDNNRSLDLDSIIAEVK	1xDeamidated [N/Q]; 2xOxidation [M1; M10]	2	2	4	IPI:CON_00697851.1; CON_00139301.3	1	4419.07	0.21	Low
	TRUE	Low	NMQDLVEDYKNK	2xDeamidated [N11; Q/N]; 1xOxidation [M2]	1	1	2	CON_00139301.3	1	1514.67	0.2	Low
	TRUE	Low	LLREYQELMNTK	2xDeamidated [Q6; N10]	3	3	1	IPI:CON_00697851.1; CON_00139301.3; CON_00009867.3	1	1539.77	0.2	Low
	TRUE	Low	TIKQNLDPLFEQYINNLR	1xDeamidated [N]	1	1	2	CON_00139301.3	1	2220.17	0.2	Low
	TRUE	Low	MIQRLRSEIDNVK		2	2	1	IPI:CON_00697851.1; CON_00139301.3	2	1601.88	0.2	Low
	TRUE	Low	QCANLQNAIAEAEQRGELALKDAR	1xDeamidated [Q14]	1	1	1	CON_00139301.3	2	2613.3	0.2	Low
	TRUE	Low	DVDAAYMNK	1xDeamidated [N8]; 1xOxidation [M7]	10	11	1	CON_IPI00005859.3; CON_IPI00293665.9; CON_00300725.7; CON_00131368.3; CON_00347096.2; IPI:CON_00697851.1; CON_00299145.9; CON_IPI00103481.3; CON_00139301.3; CON_00009867.3	0	1043.43	0.19	Low
	TRUE	Low	HEISEMNRMIQRLR		3	3	1	IPI:CON_00697851.1; CON_00139301.3; CON_00009867.3	2	1812.93	0.18	Low
	TRUE	Low	VDALMDEINFMK	1xDeamidated [N9]; 1xOxidation [M]	3	3	2	IPI:CON_00697851.1; CON_00139301.3; CON_00009867.3	0	1442.65	0.18	Low
	TRUE	Low	QCANLQNAIAEAEQRGELALK	1xDeamidated [N/Q]	1	1	5	CON_00139301.3	1	2271.14	0.17	Low
	TRUE	Low	MIQRLR	1xDeamidated [Q3]	13	14	1	CON_IPI00290857.2; CON_IPI00005859.3; CON_IPI00293665.9; CON_00300725.7; CON_00131368.3; CON_00221797.1; IPI:CON_00697851.1; CON_00299145.9; CON_00420312.4; CON_IPI00008359.1; CON_IPI00290078.5; CON_00139301.3; CON_00009867.3	1	817.471	0.17	Low
	TRUE	Low	AKQDMAR	1xDeamidated [Q3]	10	10	1	CON_IPI00005859.3; CON_00131368.3; CON_00221797.1; IPI:CON_00697851.1; CON_IPI00787323.2; CON_IPI00306959.10; CON_00660358.2; CON_IPI00554648.3; CON_00139301.3; CON_00009867.3	1	820.398	0.17	Low
	TRUE	Low	TLNNKFASFIDK	2xDeamidated [N3; N4]	24	25	2	CON_IPI00847342.1; CON_IPI00290857.2; CON_00622240.4; IPI:CON_105456; CON_IPI00005859.3; CON_IPI00293665.9; CON_00300725.7; CON_IPI00241841.9; CON_00131368.3; CON_00221797.1; CON_00124499.2; IPI:CON_00697851.1; CON_00299145.9; CON_00420312.4; IPI:CON_130456; CON_00021304.1; CON_IPI00017870.1; CON_00462140.1; CON_IPI00008359.1; CON_IPI00306959.10; CON_IPI00406377.3; CON_IPI00554648.3; CON_00139301…	1	1399.71	0.15	Low
	TRUE	Low	TLNNKFASFIDKVR	2xDeamidated [N3; N4]	23	24	1	CON_IPI00847342.1; CON_IPI00290857.2; CON_00622240.4; IPI:CON_105456; CON_IPI00005859.3; CON_IPI00293665.9; CON_00300725.7; CON_IPI00241841.9; CON_00131368.3; CON_00221797.1; CON_00124499.2; IPI:CON_00697851.1; CON_00299145.9; CON_00420312.4; IPI:CON_130456; CON_00021304.1; CON_00462140.1; CON_IPI00008359.1; CON_IPI00306959.10; CON_IPI00406377.3; CON_IPI00554648.3; CON_00139301.3; CON_00009867.3	2	1654.88	0.15	Low
	TRUE	Low	MFFDAELSQMQTHVSDTSVVLSMDNNRSLDLDSIIAEVK	2xDeamidated [Q9; Q11]; 1xOxidation [M23]	2	2	1	IPI:CON_00697851.1; CON_00139301.3	1	4404.06	0.14	Low
	TRUE	Low	MSRQSSVSFR	1xOxidation [M1]	2	2	1	CON_00139301.3; CON_00009867.3	1	1200.58	0.13	Low
	TRUE	Low	GRLDSELR		8	9	1	CON_IPI00293665.9; CON_00300725.7; CON_IPI00241841.9; CON_00131368.3; IPI:CON_00697851.1; CON_00299145.9; CON_00139301.3; CON_00009867.3	1	945.511	0.12	Low
	TRUE	Low	LLREYQELMNTK		3	3	1	IPI:CON_00697851.1; CON_00139301.3; CON_00009867.3	1	1537.8	0.12	Low
	TRUE	Low	NMQDLVEDYKNK	1xDeamidated [N11]	1	1	1	CON_00139301.3	1	1497.69	0.11	Low
	TRUE	Low	YEDEINKR	1xDeamidated [N6]	20	21	1	CON_IPI00748057.2; CON_IPI00290857.2; CON_00622240.4; CON_IPI00376379.3; CON_IPI00005859.3; CON_IPI00293665.9; CON_00300725.7; IPI:CON_00714876.1; CON_00131368.3; CON_00221797.1; CON_00124499.2; IPI:CON_00697851.1; CON_00299145.9; CON_00021304.1; CON_00462140.1; CON_IPI00008359.1; CON_00220327.3; CON_IPI00554648.3; CON_00139301.3; CON_00009867.3	1	1067.5	0.08	Low
	TRUE	Low	NTKHEISEMNRMIQR	3xDeamidated [N1; N10; Q14]; 1xOxidation [M12]	3	3	1	IPI:CON_00697851.1; CON_00139301.3; CON_00009867.3	2	1905.88	0.07	Low
	TRUE	Low	LRSEIDNVK		3	3	1	IPI:CON_00697851.1; CON_00220327.3; CON_00139301.3	1	1073.59	0.07	Low
	TRUE	Low	GGGGLGLGSGLSVGGSGFSAGSSQGGMSFGSGGGSGSSVK	1xDeamidated [Q24]; 1xOxidation [M27]	1	1	1	CON_00139301.3	0	3309.49	0.06	Low
	TRUE	Low	QNLDPLFEQYINNLRR	2xDeamidated [N/Q]	1	1	3	CON_00139301.3	1	2035.02	0.05	Low
	TRUE	Low	LDSELRNMQDLVEDYK	1xDeamidated [Q/N]; 1xOxidation [M8]	2	2	2	CON_IPI00103481.3; CON_00139301.3	1	1984.92	0.04	Low
	TRUE	Low	TTAENEFVMLKKDVDAAYMNK	1xDeamidated [N20]; 2xOxidation [M9; M19]	3	3	1	IPI:CON_00697851.1; CON_00139301.3; CON_00009867.3	2	2451.14	0.04	Low
	TRUE	Low	NKYEDEINK	2xDeamidated [N1; N8]	14	15	1	CON_IPI00748057.2; CON_IPI00293665.9; CON_00300725.7; CON_IPI00241841.9; CON_00124499.2; IPI:CON_00697851.1; CON_00299145.9; CON_IPI00017870.1; CON_00462140.1; CON_00220327.3; CON_IPI00787323.2; CON_IPI00554648.3; CON_00139301.3; CON_00009867.3	1	1154.52	0.03	Low
TRUE	Master Protein	CON_00462140.1	Keratin, type II cytoskeletal 1b	91.6084	72	213	60	1	572	61.3	8.02	29.47	72
	Checked	Confidence	Sequence	Modifications	# Protein Groups	# Proteins	# PSMs	Master Protein Accessions	# Missed Cleavages	Theo. MH+ [Da]	XCorr Sequest HT	Confidence Sequest HT
	TRUE	High	FLEQQNQVLQTKWELLQQVNTSTR	1xDeamidated [N20]	1	1	1	CON_00462140.1	1	2932.52	6.75	High
	TRUE	High	TLNNKFASFIDKVR		23	24	3	CON_IPI00847342.1; CON_IPI00290857.2; CON_00622240.4; IPI:CON_105456; CON_IPI00005859.3; CON_IPI00293665.9; CON_00300725.7; CON_IPI00241841.9; CON_00131368.3; CON_00221797.1; CON_00124499.2; IPI:CON_00697851.1; CON_00299145.9; CON_00420312.4; IPI:CON_130456; CON_00021304.1; CON_00462140.1; CON_IPI00008359.1; CON_IPI00306959.10; CON_IPI00406377.3; CON_IPI00554648.3; CON_00139301.3; CON_00009867.3	2	1652.91	4.51	High
	TRUE	High	FLEQQNQVLQTK		7	7	1	CON_00468956.4; CON_00347110.2; CON_IPI00376379.3; IPI:CON_00714876.1; CON_00021304.1; CON_00462140.1; CON_00220327.3	0	1475.79	4.12	High
	TRUE	High	WELLQQVNTSTR	1xDeamidated [N8]	1	1	1	CON_00462140.1	0	1475.75	3.55	High
	TRUE	High	NKYEDEINKR		11	12	5	CON_IPI00748057.2; CON_IPI00293665.9; CON_00300725.7; CON_00124499.2; IPI:CON_00697851.1; CON_00299145.9; CON_00462140.1; CON_00220327.3; CON_IPI00554648.3; CON_00139301.3; CON_00009867.3	2	1308.65	2.8	High
	TRUE	High	FASFIDKVR		31	32	1	CON_IPI00847342.1; CON_IPI00329306.3; CON_IPI00290857.2; CON_00622240.4; CON_IPI00174775.2; CON_00468956.4; IPI:CON_105456; CON_00347110.2; CON_IPI00376379.3; CON_IPI00005859.3; CON_IPI00293665.9; CON_00300725.7; CON_IPI00241841.9; CON_00131368.3; CON_00347096.2; CON_00221797.1; CON_00124499.2; IPI:CON_00697851.1; CON_00299145.9; CON_00420312.4; IPI:CON_130456; CON_00021304.1; CON_00462140.1; CON…	1	1082.6	2.64	High
	TRUE	Medium	NSKMEISELNRNIQR	3xDeamidated [N10; N12; Q14]	1	1	1	CON_00462140.1	2	1834.9	1.03	Medium
	TRUE	Medium	LLRDYQAMLGAK		1	1	2	CON_00462140.1	1	1378.75	0.97	Medium
	TRUE	Medium	DVDAAFMGKSDLQSK		1	1	1	CON_00462140.1	1	1611.77	0.87	Medium
	TRUE	Medium	QFSSQSAFSSRSR	2xDeamidated [Q1; Q5]	1	1	1	CON_00462140.1	1	1476.67	0.81	Medium
	TRUE	Low	QLLEGEESRMSGALQSQVSISVQSSQVTIGGGGGGSGSYSGSSR	3xDeamidated [Q1; Q15; Q17]; 1xOxidation [M10]	1	1	1	CON_00462140.1	1	4321	0.97	Low
	TRUE	Low	QVEGMHGLISDAEERGERALQNAK		1	1	1	CON_00462140.1	2	2638.3	0.86	Low
	TRUE	Low	ALQNAKQKLQDMEEALQQAK	1xOxidation [M12]	1	1	1	CON_00462140.1	2	2301.19	0.85	Low
	TRUE	Low	QKLQDMEEALQQAKEDLAK	1xDeamidated [Q]; 1xOxidation [M6]	1	1	10	CON_00462140.1	2	2233.1	0.76	Low
	TRUE	Low	QVDVLTTEQLRQNTEIR		1	1	2	CON_00462140.1	1	2043.08	0.74	Low
	TRUE	Low	KQVEGMHGLISDAEERGER	1xDeamidated [Q2]	1	1	2	CON_00462140.1	2	2142.02	0.74	Low
	TRUE	Low	QLLEGEESR		2	2	1	CON_IPI00376379.3; CON_00462140.1	0	1060.53	0.72	Low
	TRUE	Low	YQELQITAGKHGDDLK	2xDeamidated [Q2; Q5]	1	1	3	CON_00462140.1	1	1817.89	0.71	Low
	TRUE	Low	LQDMEEALQQAKEDLAK		1	1	1	CON_00462140.1	1	1959.97	0.7	Low
	TRUE	Low	ALQNAKQK	2xDeamidated [Q3; N4]	1	1	1	CON_00462140.1	1	902.494	0.69	Low
	TRUE	Low	EDLAKLLRDYQAMLGAK		1	1	3	CON_00462140.1	2	1935.04	0.68	Low
	TRUE	Low	QVDVLTTEQLRQNTEIRNMQDVVEDYK	1xDeamidated [Q1]; 1xOxidation [M19]	1	1	1	CON_00462140.1	2	3281.6	0.64	Low
	TRUE	Low	SASGFCQSRGPGGGFGGGIGGGIGGGRGFGGGGFGGGYGGGGR	1xDeamidated [Q7]	1	1	1	CON_00462140.1	2	3608.62	0.63	Low
	TRUE	Low	YQELQITAGKHGDDLK		1	1	1	CON_00462140.1	1	1815.92	0.6	Low
	TRUE	Low	KQVEGMHGLISDAEERGER		1	1	3	CON_00462140.1	2	2141.04	0.6	Low
	TRUE	Low	ALQNAKQK	1xDeamidated [N/Q]	1	1	4	CON_00462140.1	1	901.51	0.59	Low
	TRUE	Low	QVEGMHGLISDAEERGERALQNAK	1xDeamidated [N/Q]	1	1	2	CON_00462140.1	2	2639.28	0.58	Low
	TRUE	Low	QVDVLTTEQLRQNTEIR	2xDeamidated [Q9; Q12]	1	1	1	CON_00462140.1	1	2045.05	0.58	Low
	TRUE	Low	QKLQDMEEALQQAKEDLAK	1xDeamidated [Q]	1	1	4	CON_00462140.1	2	2217.11	0.57	Low
	TRUE	Low	SIFGNLVGRSASGFCQSR		1	1	1	CON_00462140.1	1	1885.93	0.55	Low
	TRUE	Low	KDVDAAFMGK	1xOxidation [M8]	1	1	2	CON_00462140.1	1	1097.53	0.55	Low
	TRUE	Low	VRFLEQQNQVLQTK	1xDeamidated [Q/N]	7	7	4	CON_00468956.4; CON_00347110.2; CON_IPI00376379.3; IPI:CON_00714876.1; CON_00021304.1; CON_00462140.1; CON_00220327.3	1	1731.94	0.54	Low
	TRUE	Low	KQVEGMHGLISDAEERGER	1xOxidation [M6]	1	1	1	CON_00462140.1	2	2157.04	0.54	Low
	TRUE	Low	FLEQQNQVLQTK	3xDeamidated [Q4; Q5; N/Q]	7	7	2	CON_00468956.4; CON_00347110.2; CON_IPI00376379.3; IPI:CON_00714876.1; CON_00021304.1; CON_00462140.1; CON_00220327.3	0	1478.74	0.53	Low
	TRUE	Low	EDLAKLLRDYQAMLGAK	1xDeamidated [Q11]	1	1	3	CON_00462140.1	2	1936.02	0.53	Low
	TRUE	Low	QKLQDMEEALQQAK	2xDeamidated [Q4; Q11]	1	1	1	CON_00462140.1	1	1661.81	0.53	Low
	TRUE	Low	DVDAAFMGK	1xOxidation [M7]	1	1	1	CON_00462140.1	0	969.435	0.51	Low
	TRUE	Low	QNTEIRNMQDVVEDYK	2xDeamidated [Q1; Q9]	1	1	2	CON_00462140.1	1	1983.9	0.5	Low
	TRUE	Low	LQDMEEALQQAK	2xDeamidated [Q9; Q]; 1xOxidation [M4]	1	1	5	CON_00462140.1	0	1421.65	0.5	Low
	TRUE	Low	QALVSVSQSRRYGGDYGGGFSSR	2xDeamidated [Q1; Q8]	1	1	1	CON_00462140.1	2	2436.15	0.49	Low
	TRUE	Low	TLNNKFASFIDK	1xDeamidated [N]	24	25	7	CON_IPI00847342.1; CON_IPI00290857.2; CON_00622240.4; IPI:CON_105456; CON_IPI00005859.3; CON_IPI00293665.9; CON_00300725.7; CON_IPI00241841.9; CON_00131368.3; CON_00221797.1; CON_00124499.2; IPI:CON_00697851.1; CON_00299145.9; CON_00420312.4; IPI:CON_130456; CON_00021304.1; CON_IPI00017870.1; CON_00462140.1; CON_IPI00008359.1; CON_IPI00306959.10; CON_IPI00406377.3; CON_IPI00554648.3; CON_00139301…	1	1398.73	0.48	Low
	TRUE	Low	WELLQQVNTSTRTSSLEPVFEEFISQLQR	2xDeamidated [Q6; Q26]	1	1	1	CON_00462140.1	1	3467.73	0.48	Low
	TRUE	Low	QNTEIRNMQDVVEDYK	2xDeamidated [Q1; Q9]; 1xOxidation [M8]	1	1	1	CON_00462140.1	1	1999.89	0.48	Low
	TRUE	Low	NMQDVVEDYKNK	3xDeamidated [N1; Q3; N11]	1	1	1	CON_00462140.1	1	1485.64	0.46	Low
	TRUE	Low	DVDAAFMGKSDLQSK	1xOxidation [M7]	1	1	1	CON_00462140.1	1	1627.76	0.45	Low
	TRUE	Low	DYQAMLGAKLSLDVEIATYR	1xDeamidated [Q3]; 1xOxidation [M5]	1	1	1	CON_00462140.1	1	2274.13	0.45	Low
	TRUE	Low	GGGGGGGGTGSRGGGGGGGGSSYVSSSR		1	1	1	CON_00462140.1	1	2185.96	0.44	Low
	TRUE	Low	KQVEGMHGLISDAEER		1	1	1	CON_00462140.1	1	1798.88	0.44	Low
	TRUE	Low	MSRQFSSQSAFSSRSR	1xDeamidated [Q]; 1xAcetyl [N-Term]	1	1	4	CON_00462140.1	2	1891.87	0.44	Low
	TRUE	Low	ALQNAKQKLQDMEEALQQAK	1xDeamidated [Q17]	1	1	1	CON_00462140.1	2	2286.18	0.43	Low
	TRUE	Low	QVEGMHGLISDAEERGERALQNAK	1xDeamidated [Q/N]; 1xOxidation [M5]	1	1	3	CON_00462140.1	2	2655.28	0.43	Low
	TRUE	Low	KQVEGMHGLISDAEER	1xOxidation [M6]	1	1	1	CON_00462140.1	1	1814.87	0.43	Low
	TRUE	Low	QVDVLTTEQLRQNTEIRNMQDVVEDYK	3xDeamidated [Q9; Q12; Q20]	1	1	1	CON_00462140.1	2	3267.57	0.42	Low
	TRUE	Low	GGGGGGGGSSYVSSSRSATKYGSGGGSSR		1	1	2	CON_00462140.1	2	2524.14	0.42	Low
	TRUE	Low	TNAENDFVVLKKDVDAAFMGK	1xOxidation [M19]	1	1	1	CON_00462140.1	2	2328.15	0.42	Low
	TRUE	Low	KDVDAAFMGKSDLQSK	1xDeamidated [Q14]; 1xOxidation [M8]	1	1	1	CON_00462140.1	2	1756.84	0.41	Low
	TRUE	Low	NSKMEISELNRNIQR	2xDeamidated [N/Q]; 1xOxidation [M4]	1	1	11	CON_00462140.1	2	1849.91	0.4	Low
	TRUE	Low	KQVEGMHGLISDAEER	1xDeamidated [Q2]; 1xOxidation [M6]	1	1	1	CON_00462140.1	1	1815.85	0.39	Low
	TRUE	Low	FLEQQNQVLQTKWELLQQVNTSTR	2xDeamidated [Q10; Q17]	1	1	1	CON_00462140.1	1	2933.5	0.39	Low
	TRUE	Low	AQYEIIAQK	1xDeamidated [Q2]	2	2	2	CON_00124499.2; CON_00462140.1	0	1064.56	0.39	Low
	TRUE	Low	ALQNAKQKLQDMEEALQQAK		1	1	1	CON_00462140.1	2	2285.19	0.38	Low
	TRUE	Low	AYSSRSSSGFGGGRQALVSVSQSR	1xDeamidated [Q22]	1	1	1	CON_00462140.1	2	2432.19	0.38	Low
	TRUE	Low	LQDMEEALQQAK	1xDeamidated [Q]	1	1	2	CON_00462140.1	0	1404.67	0.37	Low
	TRUE	Low	LLRDYQAMLGAK	1xOxidation [M8]	1	1	1	CON_00462140.1	1	1394.75	0.36	Low
	TRUE	Low	VKTQEREQIK	1xDeamidated [Q]	1	1	2	CON_00462140.1	2	1259.7	0.36	Low
	TRUE	Low	MSRQFSSQSAFSSR	1xAcetyl [N-Term]	1	1	1	CON_00462140.1	1	1647.75	0.36	Low
	TRUE	Low	YGSGGGSSRTQILQTSTHSSRR		1	1	1	CON_00462140.1	2	2323.15	0.35	Low
	TRUE	Low	LQDMEEALQQAK	3xDeamidated [Q2; Q9; Q10]; 1xOxidation [M4]	1	1	2	CON_00462140.1	0	1422.63	0.35	Low
	TRUE	Low	SKDEAEALYQTK		2	2	2	CON_IPI00376379.3; CON_00462140.1	1	1382.68	0.34	Low
	TRUE	Low	NMQDVVEDYKNK	2xDeamidated [N11; N/Q]; 1xOxidation [M2]	1	1	2	CON_00462140.1	1	1500.65	0.33	Low
	TRUE	Low	QVEGMHGLISDAEERGERALQNAK	2xDeamidated [Q1; N/Q]	1	1	2	CON_00462140.1	2	2640.27	0.3	Low
	TRUE	Low	HGDDLKNSKMEISELNR	1xDeamidated [N7]	1	1	1	CON_00462140.1	2	1986.95	0.29	Low
	TRUE	Low	LQDMEEALQQAKEDLAK	2xDeamidated [Q9; Q10]	1	1	2	CON_00462140.1	1	1961.94	0.29	Low
	TRUE	Low	QFSSQSAFSSRSR	1xDeamidated [Q]	1	1	2	CON_00462140.1	1	1475.69	0.28	Low
	TRUE	Low	QKLQDMEEALQQAK	1xDeamidated [Q]	1	1	5	CON_00462140.1	1	1660.82	0.27	Low
	TRUE	Low	SASGFCQSRGPGGGFGGGIGGGIGGGR	1xC29H38O4 [C6]	1	1	1	CON_00462140.1	1	2760.36	0.27	Low
	TRUE	Low	NMQDVVEDYKNK	2xDeamidated [N11; N/Q]	1	1	6	CON_00462140.1	1	1484.66	0.26	Low
	TRUE	Low	SATKYGSGGGSSR		1	1	1	CON_00462140.1	1	1214.58	0.26	Low
	TRUE	Low	QVDVLTTEQLRQNTEIRNMQDVVEDYK	3xDeamidated [Q1; Q9; Q12]; 1xOxidation [M19]	1	1	1	CON_00462140.1	2	3283.56	0.25	Low
	TRUE	Low	YLFDTELSQIQTHVSDTNVILSMDNNR	1xDeamidated [Q]; 1xOxidation [M23]	1	1	2	CON_00462140.1	0	3170.49	0.25	Low
	TRUE	Low	SKDEAEALYQTK	1xDeamidated [Q10]	2	2	1	CON_IPI00376379.3; CON_00462140.1	1	1383.66	0.24	Low
	TRUE	Low	QALVSVSQSRR		1	1	1	CON_00462140.1	1	1230.69	0.24	Low
	TRUE	Low	EDLAKLLR		1	1	1	CON_00462140.1	1	957.573	0.24	Low
	TRUE	Low	KQVEGMHGLISDAEER	1xDeamidated [Q2]	1	1	2	CON_00462140.1	1	1799.86	0.23	Low
	TRUE	Low	QKLQDMEEALQQAK	3xDeamidated [Q4; Q11; Q]	1	1	2	CON_00462140.1	1	1662.79	0.22	Low
	TRUE	Low	SIFGNLVGRSASGFCQSR	1xDeamidated [N/Q]	1	1	2	CON_00462140.1	1	1886.92	0.22	Low
	TRUE	Low	MEISELNRNIQRLR	1xOxidation [M1]	1	1	1	CON_00462140.1	2	1787.95	0.21	Low
	TRUE	Low	KDVDAAFMGK		1	1	1	CON_00462140.1	1	1081.53	0.21	Low
	TRUE	Low	GGGGGGGGSSYVSSSRSATK		1	1	1	CON_00462140.1	1	1715.79	0.2	Low
	TRUE	Low	DVDAAFMGKSDLQSK	1xDeamidated [Q13]	1	1	1	CON_00462140.1	1	1612.75	0.2	Low
	TRUE	Low	SLDLDSIIDAVRAQYEIIAQKSK	1xDeamidated [Q14]	1	1	1	CON_00462140.1	2	2577.38	0.19	Low
	TRUE	Low	AEIANIKK	1xDeamidated [N5]	1	1	1	CON_00462140.1	1	887.52	0.19	Low
	TRUE	Low	SATKYGSGGGSSRTQILQTSTHSSR	1xDeamidated [Q]	1	1	2	CON_00462140.1	2	2555.24	0.16	Low
	TRUE	Low	FLEQQNQVLQTKWELLQQVNTSTR	3xDeamidated [Q4; Q5; N/Q]	1	1	2	CON_00462140.1	1	2934.48	0.16	Low
	TRUE	Low	SLYSLGGSKSIFGNLVGR	1xDeamidated [N14]	1	1	1	CON_00462140.1	1	1855.99	0.15	Low
	TRUE	Low	TLNNKFASFIDK	2xDeamidated [N3; N4]	24	25	2	CON_IPI00847342.1; CON_IPI00290857.2; CON_00622240.4; IPI:CON_105456; CON_IPI00005859.3; CON_IPI00293665.9; CON_00300725.7; CON_IPI00241841.9; CON_00131368.3; CON_00221797.1; CON_00124499.2; IPI:CON_00697851.1; CON_00299145.9; CON_00420312.4; IPI:CON_130456; CON_00021304.1; CON_IPI00017870.1; CON_00462140.1; CON_IPI00008359.1; CON_IPI00306959.10; CON_IPI00406377.3; CON_IPI00554648.3; CON_00139301…	1	1399.71	0.15	Low
	TRUE	Low	TLNNKFASFIDKVR	2xDeamidated [N3; N4]	23	24	1	CON_IPI00847342.1; CON_IPI00290857.2; CON_00622240.4; IPI:CON_105456; CON_IPI00005859.3; CON_IPI00293665.9; CON_00300725.7; CON_IPI00241841.9; CON_00131368.3; CON_00221797.1; CON_00124499.2; IPI:CON_00697851.1; CON_00299145.9; CON_00420312.4; IPI:CON_130456; CON_00021304.1; CON_00462140.1; CON_IPI00008359.1; CON_IPI00306959.10; CON_IPI00406377.3; CON_IPI00554648.3; CON_00139301.3; CON_00009867.3	2	1654.88	0.15	Low
	TRUE	Low	NMQDVVEDYKNK		1	1	1	CON_00462140.1	1	1482.69	0.14	Low
	TRUE	Low	NMQDVVEDYK	2xDeamidated [N1; Q3]; 1xOxidation [M2]	1	1	1	CON_00462140.1	0	1258.51	0.13	Low
	TRUE	Low	LSLDVEIATYRQLLEGEESR	1xDeamidated [Q12]	2	2	1	CON_IPI00376379.3; CON_00462140.1	1	2322.18	0.13	Low
	TRUE	Low	QVDVLTTEQLRQNTEIR	1xDeamidated [Q1]	1	1	1	CON_00462140.1	1	2044.07	0.13	Low
	TRUE	Low	DYQAMLGAK	1xDeamidated [Q3]; 1xOxidation [M5]	1	1	1	CON_00462140.1	0	1013.46	0.12	Low
	TRUE	Low	ALQNAKQK		1	1	1	CON_00462140.1	1	900.526	0.12	Low
	TRUE	Low	QVDVLTTEQLRQNTEIRNMQDVVEDYK	2xDeamidated [Q9; Q]; 1xOxidation [M19]	1	1	2	CON_00462140.1	2	3282.58	0.12	Low
	TRUE	Low	TQILQTSTHSSRRHVVE	2xDeamidated [Q2; Q5]	1	1	1	CON_00462140.1	2	1981.01	0.12	Low
	TRUE	Low	LQDMEEALQQAKEDLAK	1xDeamidated [Q]	1	1	3	CON_00462140.1	1	1960.95	0.12	Low
	TRUE	Low	QKLQDMEEALQQAK	1xDeamidated [Q1]; 1xOxidation [M6]	1	1	1	CON_00462140.1	1	1676.82	0.12	Low
	TRUE	Low	VDTLYGEINFLK		1	1	1	CON_00462140.1	0	1411.75	0.11	Low
	TRUE	Low	ALQNAKQKLQDMEEALQQAK	3xDeamidated [Q10; Q17; Q18]	1	1	1	CON_00462140.1	2	2288.14	0.11	Low
	TRUE	Low	SKDEAEALYQTKYQELQITAGK	1xDeamidated [Q]	1	1	2	CON_00462140.1	2	2515.26	0.1	Low
	TRUE	Low	YEDEINKR	1xDeamidated [N6]	20	21	1	CON_IPI00748057.2; CON_IPI00290857.2; CON_00622240.4; CON_IPI00376379.3; CON_IPI00005859.3; CON_IPI00293665.9; CON_00300725.7; IPI:CON_00714876.1; CON_00131368.3; CON_00221797.1; CON_00124499.2; IPI:CON_00697851.1; CON_00299145.9; CON_00021304.1; CON_00462140.1; CON_IPI00008359.1; CON_00220327.3; CON_IPI00554648.3; CON_00139301.3; CON_00009867.3	1	1067.5	0.08	Low
	TRUE	Low	LLRDYQAMLGAKLSLDVEIATYR	1xDeamidated [Q6]; 1xOxidation [M8]	1	1	1	CON_00462140.1	2	2656.4	0.05	Low
	TRUE	Low	MSRQFSSQSAFSSR	1xDeamidated [Q4]; 1xOxidation [M1]	1	1	1	CON_00462140.1	1	1622.72	0.05	Low
	TRUE	Low	YEDEINKRTNAENDFVVLK		1	1	1	CON_00462140.1	2	2297.14	0.04	Low
	TRUE	Low	NIQRLRAEIANIK		1	1	2	CON_00462140.1	2	1538.91	0.03	Low
	TRUE	Low	GERALQNAKQK	2xDeamidated [Q6; Q/N]	1	1	2	CON_00462140.1	2	1244.66	0.03	Low
	TRUE	Low	LRAEIANIKK		1	1	1	CON_00462140.1	2	1155.72	0.03	Low
	TRUE	Low	NKYEDEINK	2xDeamidated [N1; N8]	14	15	1	CON_IPI00748057.2; CON_IPI00293665.9; CON_00300725.7; CON_IPI00241841.9; CON_00124499.2; IPI:CON_00697851.1; CON_00299145.9; CON_IPI00017870.1; CON_00462140.1; CON_00220327.3; CON_IPI00787323.2; CON_IPI00554648.3; CON_00139301.3; CON_00009867.3	1	1154.52	0.03	Low
TRUE	Master Protein	CON_IPI00398625.5	Hornerin	44.1053	70	120	70	1	2850	282.2	10.04	21.05	70
	Checked	Confidence	Sequence	Modifications	# Protein Groups	# Proteins	# PSMs	Master Protein Accessions	# Missed Cleavages	Theo. MH+ [Da]	XCorr Sequest HT	Confidence Sequest HT
	TRUE	High	SSSRGPYESGSGHSSGLGHQESR		1	1	1	CON_IPI00398625.5	1	2346.05	4.42	High
	TRUE	High	GPYESGSGHSSGLGHR		1	1	2	CON_IPI00398625.5	0	1584.71	4.25	High
	TRUE	High	HGSGSGQSSSYSPYGSGSGWSSSR		1	1	1	CON_IPI00398625.5	0	2348.98	3.6	High
	TRUE	High	GSGSGQSPSSGQHGTGFGR		1	1	2	CON_IPI00398625.5	0	1747.77	2.71	High
	TRUE	High	YGQQGSGSGQSPSR		1	1	1	CON_IPI00398625.5	0	1395.62	2.38	High
	TRUE	Medium	QSLGHGQHGSGSGQSPSPSR		1	1	3	CON_IPI00398625.5	0	1947.9	2.05	Medium
	TRUE	Medium	GPYESGSGHSSGLGHRESR		1	1	1	CON_IPI00398625.5	1	1956.89	1.71	Medium
	TRUE	Medium	SSSRGPYESR		1	1	1	CON_IPI00398625.5	1	1125.53	1.64	Medium
	TRUE	Medium	QSPSYGR		1	1	1	CON_IPI00398625.5	0	794.379	1.55	Medium
	TRUE	Medium	GSGSGQSPSYGR		1	1	1	CON_IPI00398625.5	0	1139.51	1.41	Medium
	TRUE	Medium	HGSGSGQSSSYSPYGSGSGWSSSRGPYESGSGHSSGLGHR	1xDeamidated [Q7]	1	1	1	CON_IPI00398625.5	1	3915.66	1.38	Medium
	TRUE	Medium	LLQGVITVIDVFYQYATQHGEYDTLNK	1xDeamidated [N26]	1	1	1	CON_IPI00398625.5	0	3129.58	1.37	Medium
	TRUE	Medium	QSSSYGQHESASRHSSGRGQHSSGSGQSPGHGQR	3xDeamidated [Q20; Q27; Q33]	1	1	8	CON_IPI00398625.5	2	3495.5	1.26	Medium
	TRUE	Low	KVDFTEYLLMIFKLVQAR	1xOxidation [M10]	1	1	2	CON_IPI00398625.5	2	2230.23	0.93	Low
	TRUE	Low	HGSGSGHSSSYGQHGSGSGWSSSSGR		1	1	2	CON_IPI00398625.5	0	2477.02	0.82	Low
	TRUE	Low	HGSGSGQSSSYSPYGSGSGWSSSRGPYESGSGHSSGLGHRESR		1	1	1	CON_IPI00398625.5	2	4286.85	0.66	Low
	TRUE	Low	ELLENEFHQILKNPNDPDTVDIILQSLDR	2xDeamidated [N/Q]	1	1	5	CON_IPI00398625.5	1	3420.72	0.65	Low
	TRUE	Low	LLQGVITVIDVFYQYATQHGEYDTLNK	3xDeamidated [Q3; Q14; Q18]	1	1	1	CON_IPI00398625.5	0	3131.55	0.61	Low
	TRUE	Low	QGSGSRQSPSHVR		1	1	2	CON_IPI00398625.5	1	1382.69	0.61	Low
	TRUE	Low	IIGKDYCQVSGSK	1xDeamidated [Q8]	1	1	1	CON_IPI00398625.5	1	1398.69	0.58	Low
	TRUE	Low	MPKLLQGVITVIDVFYQYATQHGEYDTLNKAELK	3xDeamidated [Q6; Q17; N29]; 1xOxidation [M1]	1	1	1	CON_IPI00398625.5	2	3944.99	0.57	Low
	TRUE	Low	IIGKDYCQVSGSKLR	1xC29H38O4 [C7]	1	1	2	CON_IPI00398625.5	2	2117.17	0.55	Low
	TRUE	Low	QSSSYGQHESASRHSSGR	1xDeamidated [Q]	1	1	3	CON_IPI00398625.5	1	1948.85	0.55	Low
	TRUE	Low	SSSGQSSGYTQHGSGSGHSSSYEQHGSR		1	1	1	CON_IPI00398625.5	0	2826.17	0.52	Low
	TRUE	Low	GRHGSGSGQSSSYGPYR	1xDeamidated [Q9]	1	1	4	CON_IPI00398625.5	1	1740.77	0.52	Low
	TRUE	Low	HRSSSGSSSSYGQHGSGSR		1	1	1	CON_IPI00398625.5	1	1907.83	0.51	Low
	TRUE	Low	QSLGHSRHGSGSGQSPSPSRGR	2xDeamidated [Q1; Q14]	1	1	1	CON_IPI00398625.5	2	2221.05	0.51	Low
	TRUE	Low	KVDFTEYLLMIFKLVQAR	1xDeamidated [Q16]	1	1	1	CON_IPI00398625.5	2	2215.22	0.48	Low
	TRUE	Low	HGSGLGHSSSHGQHGSGSGR		1	1	1	CON_IPI00398625.5	0	1885.84	0.46	Low
	TRUE	Low	GSGSRQSPSYGR		1	1	1	CON_IPI00398625.5	1	1238.59	0.46	Low
	TRUE	Low	SSSGQSSGYTQHGSGSGHSSSYEQHGSRSGQSSR	2xDeamidated [Q24; Q31]	1	1	1	CON_IPI00398625.5	1	3430.41	0.43	Low
	TRUE	Low	QSSSYGQHESASR	1xDeamidated [Q7]	1	1	1	CON_IPI00398625.5	0	1424.6	0.43	Low
	TRUE	Low	YGQQGSGSGQSPSR	2xDeamidated [Q4; Q10]	1	1	1	CON_IPI00398625.5	0	1397.59	0.41	Low
	TRUE	Low	ELLENEFHQILK		1	1	2	CON_IPI00398625.5	0	1512.81	0.41	Low
	TRUE	Low	NKIIGKDYCQVSGSK		1	1	1	CON_IPI00398625.5	2	1639.85	0.37	Low
	TRUE	Low	HGSGSGHSSSHGQHGSGSGRSSSRGPYESR		1	1	1	CON_IPI00398625.5	2	2966.3	0.37	Low
	TRUE	Low	GSGSSQSSGYGRHGAGSGQSPSRGR		1	1	1	CON_IPI00398625.5	2	2364.08	0.36	Low
	TRUE	Low	MPKLLQGVITVIDVFYQYATQHGEYDTLNKAELK	2xDeamidated [Q6; N29]; 1xOxidation [M1]	1	1	1	CON_IPI00398625.5	2	3944	0.35	Low
	TRUE	Low	KHGSRSGQSSR	1xDeamidated [Q8]	1	1	1	CON_IPI00398625.5	2	1187.59	0.35	Low
	TRUE	Low	SGQSSRGERHGSSSR		1	1	1	CON_IPI00398625.5	2	1574.74	0.35	Low
	TRUE	Low	QSSSYGQHESASRHSSGR		1	1	1	CON_IPI00398625.5	1	1947.87	0.34	Low
	TRUE	Low	GSGSGQSPSSGQHGTGFGR	2xDeamidated [Q6; Q12]	1	1	1	CON_IPI00398625.5	0	1749.74	0.33	Low
	TRUE	Low	GRHESGSR		1	1	1	CON_IPI00398625.5	1	885.429	0.32	Low
	TRUE	Low	HGSGSGQSPGHGQRGSGSGQSPSYGRHGSGSGR		1	1	1	CON_IPI00398625.5	2	3107.39	0.32	Low
	TRUE	Low	QGSGSGQSPGHGQR		1	1	1	CON_IPI00398625.5	0	1339.61	0.32	Low
	TRUE	Low	HGSGSGQSSSYGPYR		1	1	1	CON_IPI00398625.5	0	1526.66	0.32	Low
	TRUE	Low	GERHRSSSGSSSSYGQHGSGSR		1	1	2	CON_IPI00398625.5	2	2250	0.3	Low
	TRUE	Low	HGSGLGHSSSHGQHGSGSGR	1xDeamidated [Q13]	1	1	1	CON_IPI00398625.5	0	1886.82	0.3	Low
	TRUE	Low	QGSGSGQSPSR	1xDeamidated [Q7]	1	1	1	CON_IPI00398625.5	0	1048.47	0.29	Low
	TRUE	Low	QSPSHVR	1xDeamidated [Q1]	1	1	1	CON_IPI00398625.5	0	811.406	0.27	Low
	TRUE	Low	QSSGHGRQGSGSGHSPSRGR		1	1	1	CON_IPI00398625.5	2	1978.93	0.27	Low
	TRUE	Low	KVDFTEYLLMIFK	1xOxidation [M10]	1	1	1	CON_IPI00398625.5	1	1662.88	0.26	Low
	TRUE	Low	DYCQVSGSKLR		1	1	1	CON_IPI00398625.5	1	1255.61	0.26	Low
	TRUE	Low	NPNDPDTVDIILQSLDR	1xDeamidated [Q/N]	1	1	3	CON_IPI00398625.5	0	1925.95	0.25	Low
	TRUE	Low	QSLGHGQHGSGSGQSPSPSR	2xDeamidated [Q7; Q]	1	1	2	CON_IPI00398625.5	0	1949.87	0.24	Low
	TRUE	Low	LLQGVITVIDVFYQYATQHGEYDTLNKAELK	1xDeamidated [N26]	1	1	1	CON_IPI00398625.5	1	3570.84	0.24	Low
	TRUE	Low	MPKLLQGVITVIDVFYQYATQHGEYDTLNKAELK	1xDeamidated [Q/N]; 1xAcetyl [N-Term]	1	1	4	CON_IPI00398625.5	2	3969.04	0.24	Low
	TRUE	Low	LVQARNKIIGK	2xDeamidated [Q3; N6]	1	1	1	CON_IPI00398625.5	2	1241.76	0.22	Low
	TRUE	Low	SSSSGRHGSGSGQSSGFGHK		1	1	1	CON_IPI00398625.5	1	1890.84	0.19	Low
	TRUE	Low	GRHGSGSGQSSSYSPYGSGSGWSSSR		1	1	1	CON_IPI00398625.5	1	2562.1	0.18	Low
	TRUE	Low	GRHGSGSGQSSSYSPYGSGSGWSSSR	1xDeamidated [Q9]	1	1	1	CON_IPI00398625.5	1	2563.08	0.18	Low
	TRUE	Low	GQHSSGSGQSPGHGQR	2xDeamidated [Q9; Q15]	1	1	1	CON_IPI00398625.5	0	1565.67	0.18	Low
	TRUE	Low	GQCGSGSGQSPNYGQHGSGSGQSSSNDTHGSGSGQSSGFSQHK		1	1	1	CON_IPI00398625.5	0	4096.67	0.15	Low
	TRUE	Low	HGSSSGSSSHYGQHGSGSR	1xDeamidated [Q13]	1	1	1	CON_IPI00398625.5	0	1859.77	0.15	Low
	TRUE	Low	QSSGHGRQGSGSGHSPSR		1	1	1	CON_IPI00398625.5	1	1765.81	0.14	Low
	TRUE	Low	SSSSGRHGSGSGQSSGFGHK	1xDeamidated [Q13]	1	1	1	CON_IPI00398625.5	1	1891.83	0.14	Low
	TRUE	Low	QGSSAGSSSSYGQHGSGSR	2xDeamidated [Q1; Q13]	1	1	1	CON_IPI00398625.5	0	1785.73	0.13	Low
	TRUE	Low	GSGSRQSPSYGRHGSGSGR	1xDeamidated [Q6]	1	1	1	CON_IPI00398625.5	2	1877.86	0.13	Low
	TRUE	Low	QSLGHSR		1	1	1	CON_IPI00398625.5	0	784.406	0.12	Low
	TRUE	Low	QGSGSGHSPSRVR		1	1	1	CON_IPI00398625.5	1	1311.65	0.12	Low
	TRUE	Low	SGQSSRGERHGSSSGSSSR		1	1	1	CON_IPI00398625.5	2	1892.86	0.12	Low
	TRUE	Low	SGQSSRSEQHGSSSGSSSSYGQHGSGSR	2xDeamidated [Q3; Q9]	1	1	1	CON_IPI00398625.5	1	2757.13	0.11	Low
	TRUE	Low	HRSSSGSSSSYGQHGSGSR	1xDeamidated [Q13]	1	1	1	CON_IPI00398625.5	1	1908.82	0.08	Low
	TRUE	Low	GERHGSSSR		1	1	2	CON_IPI00398625.5	1	972.461	0.08	Low
	TRUE	Low	ELLENEFHQILKNPNDPDTVDIILQSLDRDHNK		1	1	1	CON_IPI00398625.5	2	3912.97	0.06	Low
	TRUE	Low	GRHGSGLGHSSSHGQHGSGSGR	1xDeamidated [Q15]	1	1	1	CON_IPI00398625.5	1	2099.95	0.06	Low
	TRUE	Low	QSPSHVRHGSGSGHSSSHGQHGSGSSYSYSR	2xDeamidated [Q1; Q20]	1	1	1	CON_IPI00398625.5	1	3183.36	0.06	Low
	TRUE	Low	RQESSFSHSSWSAGENDSYSRNVR	1xDeamidated [Q2]	1	1	1	CON_IPI00398625.5	2	2774.21	0.05	Low
	TRUE	Low	QSLGHGQHGSGSGQSPSPSR	3xDeamidated [Q1; Q7; Q14]	1	1	1	CON_IPI00398625.5	0	1950.85	0.04	Low
	TRUE	Low	GRHGSGSGQSPGHGQR	1xDeamidated [Q9]	1	1	1	CON_IPI00398625.5	1	1562.72	0.04	Low
	TRUE	Low	QSLGHGQHGSGSGQSPSPSRGRHGSGSGQSSSYGPYR	3xDeamidated [Q1; Q7; Q14]	1	1	1	CON_IPI00398625.5	2	3671.62	0.04	Low
	TRUE	Low	QSLGHGQHGSGSGQSPSPSRGRHGSGSGQSSSYGPYR	2xDeamidated [Q1; Q7]	1	1	1	CON_IPI00398625.5	2	3670.64	0.03	Low
	TRUE	Low	QSSGHGRQGSGSGQSPSR	2xDeamidated [Q8; Q]	1	1	2	CON_IPI00398625.5	1	1758.77	0.03	Low
	TRUE	Low	GSGSGQSPSSGQHGTGFGR	1xDeamidated [Q6]	1	1	1	CON_IPI00398625.5	0	1748.76	0.03	Low
	TRUE	Low	QGSGSRQSPSHVR	1xDeamidated [Q7]	1	1	1	CON_IPI00398625.5	1	1383.67	0.03	Low
	TRUE	Low	HGSSSGSSSRYGQHGSGSRQSSGHGR	1xDeamidated [Q20]	1	1	1	CON_IPI00398625.5	2	2588.13	0.02	Low
TRUE	Master Protein	CON_IPI00293665.9	Keratin, type II cytoskeletal 6B	67.7305	64	212	9	1	564	60	8	20.56	64
	Checked	Confidence	Sequence	Modifications	# Protein Groups	# Proteins	# PSMs	Master Protein Accessions	# Missed Cleavages	Theo. MH+ [Da]	XCorr Sequest HT	Confidence Sequest HT
	TRUE	High	TLNNKFASFIDKVR		23	24	3	CON_IPI00847342.1; CON_IPI00290857.2; CON_00622240.4; IPI:CON_105456; CON_IPI00005859.3; CON_IPI00293665.9; CON_00300725.7; CON_IPI00241841.9; CON_00131368.3; CON_00221797.1; CON_00124499.2; IPI:CON_00697851.1; CON_00299145.9; CON_00420312.4; IPI:CON_130456; CON_00021304.1; CON_00462140.1; CON_IPI00008359.1; CON_IPI00306959.10; CON_IPI00406377.3; CON_IPI00554648.3; CON_00139301.3; CON_00009867.3	2	1652.91	4.51	High
	TRUE	High	YEELQITAGR		2	2	3	CON_IPI00293665.9; CON_00220327.3	0	1179.6	2.96	High
	TRUE	High	NKYEDEINKR		11	12	5	CON_IPI00748057.2; CON_IPI00293665.9; CON_00300725.7; CON_00124499.2; IPI:CON_00697851.1; CON_00299145.9; CON_00462140.1; CON_00220327.3; CON_IPI00554648.3; CON_00139301.3; CON_00009867.3	2	1308.65	2.8	High
	TRUE	High	FASFIDKVR		31	32	1	CON_IPI00847342.1; CON_IPI00329306.3; CON_IPI00290857.2; CON_00622240.4; CON_IPI00174775.2; CON_00468956.4; IPI:CON_105456; CON_00347110.2; CON_IPI00376379.3; CON_IPI00005859.3; CON_IPI00293665.9; CON_00300725.7; CON_IPI00241841.9; CON_00131368.3; CON_00347096.2; CON_00221797.1; CON_00124499.2; IPI:CON_00697851.1; CON_00299145.9; CON_00420312.4; IPI:CON_130456; CON_00021304.1; CON_00462140.1; CON…	1	1082.6	2.64	High
	TRUE	High	AQYEEIAQR		6	7	1	CON_IPI00293665.9; CON_00300725.7; IPI:CON_00714876.1; CON_00299145.9; CON_00021304.1; CON_IPI00290078.5	0	1107.54	2.55	High
	TRUE	Medium	FLEQQNK		28	29	2	IPI:CON_104456; CON_IPI00847342.1; CON_IPI00290857.2; IPI:CON_105456; CON_00124800.2; CON_IPI00005859.3; CON_IPI00293665.9; CON_00300725.7; CON_IPI00241841.9; CON_00131368.3; IPI:CON_106456; CON_00221797.1; CON_00124499.2; IPI:CON_00697851.1; CON_00299145.9; CON_00420312.4; IPI:CON_130456; CON_IPI00008359.1; IPI:CON_107456; CON_IPI00787323.2; CON_IPI00306959.10; CON_00166205.2; CON_IPI00406377.3;…	0	906.468	1.56	Medium
	TRUE	Medium	TVRQNLEPLFEQYINNLR	2xDeamidated [Q4; Q12]	4	5	8	CON_IPI00293665.9; CON_00300725.7; CON_00299145.9; CON_00009867.3	1	2249.16	1.22	Medium
	TRUE	Medium	ATGGGLSSVGGGSSTIK		1	2	5	CON_IPI00293665.9	0	1435.74	1.15	Medium
	TRUE	Low	ALYDAELSQMQTHISDTSVVLSMDNNRNLDLDSIIAEVK	1xOxidation [M]	3	4	2	CON_IPI00293665.9; CON_00300725.7; CON_00299145.9	1	4365.12	1.11	Low
	TRUE	Low	QNLEPLFEQYINNLRRQLDNIVGER	2xDeamidated [Q1; Q9]	1	1	1	CON_IPI00293665.9	2	3073.57	1.08	Low
	TRUE	Low	NMQDLVEDLKNKYEDEINK	1xDeamidated [N18]	2	3	2	CON_IPI00293665.9; CON_00299145.9	2	2339.11	1.07	Low
	TRUE	Low	ISIGGGSCAISGGYGSR	1xC29H38O4 [C8]	3	4	1	CON_IPI00293665.9; CON_00300725.7; CON_00299145.9	0	1992.01	0.95	Low
	TRUE	Low	SEIDHVKKQCANLQAAIADAEQR	1xDeamidated [Q14]; 1xC29H38O4 [C10]	3	4	1	CON_IPI00293665.9; CON_00300725.7; CON_00131368.3	2	2989.53	0.88	Low
	TRUE	Low	QNLEPLFEQYINNLRRQLDNIVGER	1xDeamidated [N/Q]	1	1	4	CON_IPI00293665.9	2	3072.59	0.79	Low
	TRUE	Low	NTKQEIAEINRMIQR	2xDeamidated [Q4; Q/N]	4	5	3	CON_IPI00293665.9; CON_00300725.7; CON_00131368.3; CON_00299145.9	2	1845.95	0.78	Low
	TRUE	Low	MASTSTTIRSHSSSRR	1xOxidation [M1]	3	4	1	CON_IPI00293665.9; CON_00300725.7; CON_00299145.9	2	1780.87	0.75	Low
	TRUE	Low	LDSELRNMQDLVEDLK	1xDeamidated [N/Q]	2	3	3	CON_IPI00293665.9; CON_00299145.9	1	1918.94	0.75	Low
	TRUE	Low	GEMALKDAKNK	1xDeamidated [N10]	3	4	3	CON_IPI00293665.9; CON_00300725.7; CON_00299145.9	2	1205.62	0.73	Low
	TRUE	Low	KQCANLQAAIADAEQRGEMALK	1xDeamidated [Q/N]	3	4	10	CON_IPI00293665.9; CON_00300725.7; CON_00131368.3	2	2360.17	0.73	Low
	TRUE	Low	QNLEPLFEQYINNLR	2xDeamidated [N/Q]	4	5	7	CON_IPI00293665.9; CON_00300725.7; CON_00299145.9; CON_00009867.3	0	1892.94	0.71	Low
	TRUE	Low	QNLEPLFEQYINNLR		4	5	2	CON_IPI00293665.9; CON_00300725.7; CON_00299145.9; CON_00009867.3	0	1890.97	0.7	Low
	TRUE	Low	TVRQNLEPLFEQYINNLR	3xDeamidated [N16; N/Q]	4	5	7	CON_IPI00293665.9; CON_00300725.7; CON_00299145.9; CON_00009867.3	1	2250.14	0.67	Low
	TRUE	Low	RTAAENEFVTLK		5	6	1	CON_IPI00290857.2; CON_IPI00293665.9; CON_00300725.7; CON_00131368.3; CON_00299145.9	1	1378.73	0.65	Low
	TRUE	Low	TAAENEFVTLKK	1xDeamidated [N5]	5	6	1	CON_IPI00290857.2; CON_IPI00293665.9; CON_00300725.7; CON_00131368.3; CON_00299145.9	1	1351.71	0.65	Low
	TRUE	Low	KQCANLQAAIADAEQRGEMALK	3xDeamidated [Q2; Q7; N/Q]	3	4	3	CON_IPI00293665.9; CON_00300725.7; CON_00131368.3	2	2362.14	0.64	Low
	TRUE	Low	KDVDAAYMNKVELQAK		6	7	1	CON_IPI00293665.9; CON_00300725.7; CON_00131368.3; CON_00347096.2; CON_00299145.9; CON_IPI00103481.3	2	1822.94	0.62	Low
	TRUE	Low	KDVDAAYMNKVELQAK	1xDeamidated [N/Q]; 1xOxidation [M8]	6	7	5	CON_IPI00293665.9; CON_00300725.7; CON_00131368.3; CON_00347096.2; CON_00299145.9; CON_IPI00103481.3	2	1839.92	0.61	Low
	TRUE	Low	QLDNIVGERGR		1	1	2	CON_IPI00293665.9	1	1256.67	0.61	Low
	TRUE	Low	SLYGLGGSKRISIGGGSCAISGGYGSR		3	4	1	CON_IPI00293665.9; CON_00300725.7; CON_00299145.9	2	2560.29	0.6	Low
	TRUE	Low	WTLLQEQGTK	2xDeamidated [Q5; Q7]	4	5	1	CON_IPI00293665.9; CON_00300725.7; CON_00299145.9; CON_00009867.3	0	1205.6	0.59	Low
	TRUE	Low	VRFLEQQNK	2xDeamidated [Q6; N8]	28	29	2	IPI:CON_104456; CON_IPI00847342.1; CON_IPI00290857.2; IPI:CON_105456; CON_00124800.2; CON_IPI00005859.3; CON_IPI00293665.9; CON_00300725.7; CON_IPI00241841.9; CON_00131368.3; IPI:CON_106456; CON_00221797.1; CON_00124499.2; IPI:CON_00697851.1; CON_00299145.9; CON_00420312.4; IPI:CON_130456; CON_IPI00008359.1; IPI:CON_107456; CON_IPI00787323.2; CON_IPI00306959.10; CON_00166205.2; CON_IPI00406377.3;…	1	1163.61	0.59	Low
	TRUE	Low	AEEREQIKTLNNK	3xDeamidated [Q6; N11; N12]	4	5	1	CON_IPI00005859.3; CON_IPI00293665.9; CON_00300725.7; CON_00299145.9	2	1575.79	0.57	Low
	TRUE	Low	WTLLQEQGTK		4	5	3	CON_IPI00293665.9; CON_00300725.7; CON_00299145.9; CON_00009867.3	0	1203.64	0.55	Low
	TRUE	Low	RQLDNIVGERGR	2xDeamidated [Q2; N5]	1	1	2	CON_IPI00293665.9	2	1414.74	0.54	Low
	TRUE	Low	QNLEPLFEQYINNLR	3xDeamidated [N12; N13; Q/N]	4	5	4	CON_IPI00293665.9; CON_00300725.7; CON_00299145.9; CON_00009867.3	0	1893.92	0.54	Low
	TRUE	Low	ALYDAELSQMQTHISDTSVVLSMDNNRNLDLDSIIAEVK		3	4	1	CON_IPI00293665.9; CON_00300725.7; CON_00299145.9	1	4349.13	0.54	Low
	TRUE	Low	KQCANLQAAIADAEQR	3xDeamidated [Q2; Q7; Q15]; 1xC29H38O4 [C3]	3	4	1	CON_IPI00293665.9; CON_00300725.7; CON_00131368.3	1	2183.09	0.54	Low
	TRUE	Low	VLDTKWTLLQEQGTKTVR	1xDeamidated [Q]	3	4	2	CON_IPI00293665.9; CON_00299145.9; CON_00009867.3	2	2117.16	0.53	Low
	TRUE	Low	QCANLQAAIADAEQR	3xDeamidated [Q1; Q6; Q14]	3	4	1	CON_IPI00293665.9; CON_00300725.7; CON_00131368.3	0	1604.72	0.53	Low
	TRUE	Low	WTLLQEQGTK	1xDeamidated [Q]	4	5	2	CON_IPI00293665.9; CON_00300725.7; CON_00299145.9; CON_00009867.3	0	1204.62	0.53	Low
	TRUE	Low	KQCANLQAAIADAEQR	1xDeamidated [Q/N]; 1xC29H38O4 [C3]	3	4	4	CON_IPI00293665.9; CON_00300725.7; CON_00131368.3	1	2181.13	0.52	Low
	TRUE	Low	KDVDAAYMNKVELQAK	2xDeamidated [N9; Q14]	6	7	1	CON_IPI00293665.9; CON_00300725.7; CON_00131368.3; CON_00347096.2; CON_00299145.9; CON_IPI00103481.3	2	1824.9	0.51	Low
	TRUE	Low	MASTSTTIRSHSSSR	1xAcetyl [N-Term]	3	4	1	CON_IPI00293665.9; CON_00300725.7; CON_00299145.9	1	1650.79	0.5	Low
	TRUE	Low	EYQELMNVKLALDVEIATYRK	1xDeamidated [Q/N]; 1xOxidation [M6]	5	6	2	CON_IPI00293665.9; CON_00300725.7; CON_00131368.3; CON_00221797.1; CON_00299145.9	2	2543.31	0.49	Low
	TRUE	Low	TLNNKFASFIDK	1xDeamidated [N]	24	25	7	CON_IPI00847342.1; CON_IPI00290857.2; CON_00622240.4; IPI:CON_105456; CON_IPI00005859.3; CON_IPI00293665.9; CON_00300725.7; CON_IPI00241841.9; CON_00131368.3; CON_00221797.1; CON_00124499.2; IPI:CON_00697851.1; CON_00299145.9; CON_00420312.4; IPI:CON_130456; CON_00021304.1; CON_IPI00017870.1; CON_00462140.1; CON_IPI00008359.1; CON_IPI00306959.10; CON_IPI00406377.3; CON_IPI00554648.3; CON_00139301…	1	1398.73	0.48	Low
	TRUE	Low	VRFLEQQNKVLDTK	3xDeamidated [Q6; Q7; N8]	6	7	1	CON_IPI00293665.9; CON_00131368.3; IPI:CON_00697851.1; CON_00299145.9; CON_00139301.3; CON_00009867.3	2	1720.91	0.48	Low
	TRUE	Low	QNLEPLFEQYINNLRRQLDNIVGER		1	1	1	CON_IPI00293665.9	2	3071.6	0.47	Low
	TRUE	Low	KQCANLQAAIADAEQR	3xDeamidated [Q2; Q7; N/Q]	3	4	2	CON_IPI00293665.9; CON_00300725.7; CON_00131368.3	1	1732.82	0.47	Low
	TRUE	Low	NTKQEIAEINRMIQR	1xOxidation [M12]	4	5	1	CON_IPI00293665.9; CON_00300725.7; CON_00131368.3; CON_00299145.9	2	1859.98	0.47	Low
	TRUE	Low	WTLLQEQGTKTVRQNLEPLFEQYINNLR		4	5	1	CON_IPI00293665.9; CON_00300725.7; CON_00299145.9; CON_00009867.3	2	3431.81	0.45	Low
	TRUE	Low	QCANLQAAIADAEQRGEMALK	1xOxidation [M18]	3	4	2	CON_IPI00293665.9; CON_00300725.7; CON_00131368.3	1	2247.09	0.45	Low
	TRUE	Low	GSGGLGGACGGAGFGSRSLYGLGGSKR	1xC29H38O4 [C9]	3	4	1	CON_IPI00293665.9; CON_00300725.7; CON_00299145.9	2	2836.44	0.44	Low
	TRUE	Low	NTKQEIAEINRMIQR		4	5	3	CON_IPI00293665.9; CON_00300725.7; CON_00131368.3; CON_00299145.9	2	1843.98	0.42	Low
	TRUE	Low	QCANLQAAIADAEQR	1xDeamidated [N/Q]	3	4	5	CON_IPI00293665.9; CON_00300725.7; CON_00131368.3	0	1602.75	0.42	Low
	TRUE	Low	QLDNIVGER	1xDeamidated [Q1]	1	1	1	CON_IPI00293665.9	0	1044.53	0.41	Low
	TRUE	Low	LDSELRNMQDLVEDLKNK	1xDeamidated [N/Q]; 1xOxidation [M8]	2	3	2	CON_IPI00293665.9; CON_00299145.9	2	2177.08	0.41	Low
	TRUE	Low	KQCANLQAAIADAEQRGEMALK	1xDeamidated [Q/N]; 1xC29H38O4 [C3]	3	4	5	CON_IPI00293665.9; CON_00300725.7; CON_00131368.3	2	2810.45	0.39	Low
	TRUE	Low	AEEREQIKTLNNK	1xDeamidated [N]	4	5	3	CON_IPI00005859.3; CON_IPI00293665.9; CON_00300725.7; CON_00299145.9	2	1573.82	0.37	Low
	TRUE	Low	SHSSSRRGFSANSAR		3	3	1	CON_IPI00293665.9; CON_00300725.7; CON_00299145.9	2	1606.78	0.35	Low
	TRUE	Low	KQCANLQAAIADAEQRGEMALK		3	4	1	CON_IPI00293665.9; CON_00300725.7; CON_00131368.3	2	2359.19	0.34	Low
	TRUE	Low	NLDLDSIIAEVKAQYEEIAQR		4	5	2	CON_IPI00293665.9; CON_00300725.7; CON_00299145.9; CON_00021304.1	1	2418.25	0.34	Low
	TRUE	Low	WTLLQEQGTKTVR	1xDeamidated [Q]	4	5	4	CON_IPI00293665.9; CON_00300725.7; CON_00299145.9; CON_00009867.3	1	1560.84	0.34	Low
	TRUE	Low	GRLDSELRNMQDLVEDLK	2xDeamidated [N9; Q11]; 1xOxidation [M10]	2	3	1	CON_IPI00293665.9; CON_00299145.9	2	2149.04	0.33	Low
	TRUE	Low	TAAENEFVTLKKDVDAAYMNK	1xOxidation [M19]	4	5	1	CON_IPI00293665.9; CON_00300725.7; CON_00131368.3; CON_00299145.9	2	2374.16	0.32	Low
	TRUE	Low	KQCANLQAAIADAEQR		3	4	1	CON_IPI00293665.9; CON_00300725.7; CON_00131368.3	1	1729.86	0.3	Low
	TRUE	Low	KQCANLQAAIADAEQRGEMALK	3xDeamidated [Q2; N5; Q7]; 1xC29H38O4 [C3]	3	4	1	CON_IPI00293665.9; CON_00300725.7; CON_00131368.3	2	2812.41	0.27	Low
	TRUE	Low	SRGSGGLGGACGGAGFGSR	1xC29H38O4 [C11]	3	4	1	CON_IPI00293665.9; CON_00300725.7; CON_00299145.9	1	2061.02	0.26	Low
	TRUE	Low	QEIAEINR		4	5	1	CON_IPI00293665.9; CON_00300725.7; CON_00131368.3; CON_00299145.9	0	972.511	0.25	Low
	TRUE	Low	MASTSTTIRSHSSSR	1xOxidation [M1]	3	4	1	CON_IPI00293665.9; CON_00300725.7; CON_00299145.9	1	1624.77	0.25	Low
	TRUE	Low	YEELQITAGRHGDDLR	1xDeamidated [Q5]	1	1	1	CON_IPI00293665.9	1	1873.9	0.25	Low
	TRUE	Low	AEEREQIKTLNNK		4	5	1	CON_IPI00005859.3; CON_IPI00293665.9; CON_00300725.7; CON_00299145.9	2	1572.83	0.25	Low
	TRUE	Low	GRLDSELRNMQDLVEDLK	1xDeamidated [Q/N]; 1xOxidation [M10]	2	3	2	CON_IPI00293665.9; CON_00299145.9	2	2148.06	0.24	Low
	TRUE	Low	WTLLQEQGTKTVR	2xDeamidated [Q5; Q7]	4	5	1	CON_IPI00293665.9; CON_00300725.7; CON_00299145.9; CON_00009867.3	1	1561.82	0.24	Low
	TRUE	Low	NMQDLVEDLKNK	3xDeamidated [N1; Q3; N11]; 1xOxidation [M2]	2	3	1	CON_IPI00293665.9; CON_00299145.9	1	1465.67	0.24	Low
	TRUE	Low	KQCANLQAAIADAEQR	2xDeamidated [Q/N]; 1xC29H38O4 [C3]	3	4	3	CON_IPI00293665.9; CON_00300725.7; CON_00131368.3	1	2182.11	0.24	Low
	TRUE	Low	NKLEGLEDALQK	2xDeamidated [N1; Q11]	3	4	1	CON_IPI00293665.9; CON_00300725.7; CON_00299145.9	1	1359.7	0.23	Low
	TRUE	Low	LDSELRNMQDLVEDLK		2	3	1	CON_IPI00293665.9; CON_00299145.9	1	1917.96	0.22	Low
	TRUE	Low	LLKEYQELMNVK		4	5	1	CON_IPI00293665.9; CON_00300725.7; CON_00131368.3; CON_00299145.9	1	1507.82	0.21	Low
	TRUE	Low	NTKQEIAEINRMIQR	2xDeamidated [Q4; Q14]; 1xOxidation [M12]	4	5	1	CON_IPI00293665.9; CON_00300725.7; CON_00131368.3; CON_00299145.9	2	1861.94	0.21	Low
	TRUE	Low	KDVDAAYMNKVELQAK	2xDeamidated [N9; Q14]; 1xOxidation [M8]	6	7	1	CON_IPI00293665.9; CON_00300725.7; CON_00131368.3; CON_00347096.2; CON_00299145.9; CON_IPI00103481.3	2	1840.9	0.21	Low
	TRUE	Low	MASTSTTIRSHSSSR		3	4	2	CON_IPI00293665.9; CON_00300725.7; CON_00299145.9	1	1608.78	0.2	Low
	TRUE	Low	YEELQITAGRHGDDLRNTK	1xDeamidated [N/Q]	1	1	2	CON_IPI00293665.9	2	2217.09	0.2	Low
	TRUE	Low	RTAAENEFVTLKK	1xDeamidated [N6]	5	6	1	CON_IPI00290857.2; CON_IPI00293665.9; CON_00300725.7; CON_00131368.3; CON_00299145.9	2	1507.81	0.2	Low
	TRUE	Low	DVDAAYMNK	1xDeamidated [N8]; 1xOxidation [M7]	10	11	1	CON_IPI00005859.3; CON_IPI00293665.9; CON_00300725.7; CON_00131368.3; CON_00347096.2; IPI:CON_00697851.1; CON_00299145.9; CON_IPI00103481.3; CON_00139301.3; CON_00009867.3	0	1043.43	0.19	Low
	TRUE	Low	AEAESWYQTKYEELQITAGR		1	1	1	CON_IPI00293665.9	1	2373.14	0.19	Low
	TRUE	Low	KDVDAAYMNKVELQAK	1xDeamidated [Q/N]	6	7	2	CON_IPI00293665.9; CON_00300725.7; CON_00131368.3; CON_00347096.2; CON_00299145.9; CON_IPI00103481.3	2	1823.92	0.18	Low
	TRUE	Low	MIQRLR	1xDeamidated [Q3]	13	14	1	CON_IPI00290857.2; CON_IPI00005859.3; CON_IPI00293665.9; CON_00300725.7; CON_00131368.3; CON_00221797.1; IPI:CON_00697851.1; CON_00299145.9; CON_00420312.4; CON_IPI00008359.1; CON_IPI00290078.5; CON_00139301.3; CON_00009867.3	1	817.471	0.17	Low
	TRUE	Low	DVDAAYMNKVELQAK	2xDeamidated [N8; Q13]; 1xOxidation [M7]	6	7	1	CON_IPI00293665.9; CON_00300725.7; CON_00131368.3; CON_00347096.2; CON_00299145.9; CON_IPI00103481.3	1	1712.8	0.16	Low
	TRUE	Low	TLNNKFASFIDK	2xDeamidated [N3; N4]	24	25	2	CON_IPI00847342.1; CON_IPI00290857.2; CON_00622240.4; IPI:CON_105456; CON_IPI00005859.3; CON_IPI00293665.9; CON_00300725.7; CON_IPI00241841.9; CON_00131368.3; CON_00221797.1; CON_00124499.2; IPI:CON_00697851.1; CON_00299145.9; CON_00420312.4; IPI:CON_130456; CON_00021304.1; CON_IPI00017870.1; CON_00462140.1; CON_IPI00008359.1; CON_IPI00306959.10; CON_IPI00406377.3; CON_IPI00554648.3; CON_00139301…	1	1399.71	0.15	Low
	TRUE	Low	TLNNKFASFIDKVR	2xDeamidated [N3; N4]	23	24	1	CON_IPI00847342.1; CON_IPI00290857.2; CON_00622240.4; IPI:CON_105456; CON_IPI00005859.3; CON_IPI00293665.9; CON_00300725.7; CON_IPI00241841.9; CON_00131368.3; CON_00221797.1; CON_00124499.2; IPI:CON_00697851.1; CON_00299145.9; CON_00420312.4; IPI:CON_130456; CON_00021304.1; CON_00462140.1; CON_IPI00008359.1; CON_IPI00306959.10; CON_IPI00406377.3; CON_IPI00554648.3; CON_00139301.3; CON_00009867.3	2	1654.88	0.15	Low
	TRUE	Low	NMQDLVEDLK	1xDeamidated [Q/N]	2	3	2	CON_IPI00293665.9; CON_00299145.9	0	1205.57	0.14	Low
	TRUE	Low	GEMALKDAKNK	1xOxidation [M3]	3	4	1	CON_IPI00293665.9; CON_00300725.7; CON_00299145.9	2	1220.63	0.13	Low
	TRUE	Low	GRLDSELR		8	9	1	CON_IPI00293665.9; CON_00300725.7; CON_IPI00241841.9; CON_00131368.3; IPI:CON_00697851.1; CON_00299145.9; CON_00139301.3; CON_00009867.3	1	945.511	0.12	Low
	TRUE	Low	VLDTKWTLLQEQGTKTVR		3	4	1	CON_IPI00293665.9; CON_00299145.9; CON_00009867.3	2	2116.18	0.12	Low
	TRUE	Low	ISIGGGSCAISGGYGSR		3	4	1	CON_IPI00293665.9; CON_00300725.7; CON_00299145.9	0	1541.74	0.12	Low
	TRUE	Low	LDSELRNMQDLVEDLKNK	1xDeamidated [N17]	2	3	1	CON_IPI00293665.9; CON_00299145.9	2	2161.08	0.12	Low
	TRUE	Low	SRAEAESWYQTKYEELQITAGR	2xDeamidated [Q10; Q17]	1	1	1	CON_IPI00293665.9	2	2618.24	0.11	Low
	TRUE	Low	QLDNIVGERGR	2xDeamidated [Q1; N4]	1	1	1	CON_IPI00293665.9	1	1258.64	0.11	Low
	TRUE	Low	QDLARLLK		3	4	1	CON_IPI00293665.9; CON_00300725.7; CON_00299145.9	1	956.589	0.09	Low
	TRUE	Low	QCANLQAAIADAEQR	2xDeamidated [Q1; N/Q]; 1xC29H38O4 [C2]	3	4	2	CON_IPI00293665.9; CON_00300725.7; CON_00131368.3	0	2054.01	0.08	Low
	TRUE	Low	YEDEINKR	1xDeamidated [N6]	20	21	1	CON_IPI00748057.2; CON_IPI00290857.2; CON_00622240.4; CON_IPI00376379.3; CON_IPI00005859.3; CON_IPI00293665.9; CON_00300725.7; IPI:CON_00714876.1; CON_00131368.3; CON_00221797.1; CON_00124499.2; IPI:CON_00697851.1; CON_00299145.9; CON_00021304.1; CON_00462140.1; CON_IPI00008359.1; CON_00220327.3; CON_IPI00554648.3; CON_00139301.3; CON_00009867.3	1	1067.5	0.08	Low
	TRUE	Low	NMQDLVEDLK	1xOxidation [M2]	2	3	1	CON_IPI00293665.9; CON_00299145.9	0	1220.58	0.05	Low
	TRUE	Low	LEGLEDALQKAKQDLAR	1xDeamidated [Q]	3	4	2	CON_IPI00293665.9; CON_00300725.7; CON_00299145.9	2	1899.02	0.04	Low
	TRUE	Low	NKYEDEINK	2xDeamidated [N1; N8]	14	15	1	CON_IPI00748057.2; CON_IPI00293665.9; CON_00300725.7; CON_IPI00241841.9; CON_00124499.2; IPI:CON_00697851.1; CON_00299145.9; CON_IPI00017870.1; CON_00462140.1; CON_00220327.3; CON_IPI00787323.2; CON_IPI00554648.3; CON_00139301.3; CON_00009867.3	1	1154.52	0.03	Low
TRUE	Master Protein	CON_00299145.9	Keratin, type II cytoskeletal 6C	64.3617	61	187	6	1	564	60	8	20.17	61
	Checked	Confidence	Sequence	Modifications	# Protein Groups	# Proteins	# PSMs	Master Protein Accessions	# Missed Cleavages	Theo. MH+ [Da]	XCorr Sequest HT	Confidence Sequest HT
	TRUE	High	TLNNKFASFIDKVR		23	24	3	CON_IPI00847342.1; CON_IPI00290857.2; CON_00622240.4; IPI:CON_105456; CON_IPI00005859.3; CON_IPI00293665.9; CON_00300725.7; CON_IPI00241841.9; CON_00131368.3; CON_00221797.1; CON_00124499.2; IPI:CON_00697851.1; CON_00299145.9; CON_00420312.4; IPI:CON_130456; CON_00021304.1; CON_00462140.1; CON_IPI00008359.1; CON_IPI00306959.10; CON_IPI00406377.3; CON_IPI00554648.3; CON_00139301.3; CON_00009867.3	2	1652.91	4.51	High
	TRUE	High	NKYEDEINKR		11	12	5	CON_IPI00748057.2; CON_IPI00293665.9; CON_00300725.7; CON_00124499.2; IPI:CON_00697851.1; CON_00299145.9; CON_00462140.1; CON_00220327.3; CON_IPI00554648.3; CON_00139301.3; CON_00009867.3	2	1308.65	2.8	High
	TRUE	High	FASFIDKVR		31	32	1	CON_IPI00847342.1; CON_IPI00329306.3; CON_IPI00290857.2; CON_00622240.4; CON_IPI00174775.2; CON_00468956.4; IPI:CON_105456; CON_00347110.2; CON_IPI00376379.3; CON_IPI00005859.3; CON_IPI00293665.9; CON_00300725.7; CON_IPI00241841.9; CON_00131368.3; CON_00347096.2; CON_00221797.1; CON_00124499.2; IPI:CON_00697851.1; CON_00299145.9; CON_00420312.4; IPI:CON_130456; CON_00021304.1; CON_00462140.1; CON…	1	1082.6	2.64	High
	TRUE	High	QLDSIVGER		3	4	1	CON_00300725.7; CON_00299145.9; CON_00009867.3	0	1016.54	2.58	High
	TRUE	High	AQYEEIAQR		6	7	1	CON_IPI00293665.9; CON_00300725.7; IPI:CON_00714876.1; CON_00299145.9; CON_00021304.1; CON_IPI00290078.5	0	1107.54	2.55	High
	TRUE	Medium	KQCASLQAAIADAEQRGEMALK	1xDeamidated [Q]; 1xOxidation [M19]; 1xC29H38O4 [C3]	1	1	2	CON_00299145.9	2	2799.43	1.6	Medium
	TRUE	Medium	FLEQQNK		28	29	2	IPI:CON_104456; CON_IPI00847342.1; CON_IPI00290857.2; IPI:CON_105456; CON_00124800.2; CON_IPI00005859.3; CON_IPI00293665.9; CON_00300725.7; CON_IPI00241841.9; CON_00131368.3; IPI:CON_106456; CON_00221797.1; CON_00124499.2; IPI:CON_00697851.1; CON_00299145.9; CON_00420312.4; IPI:CON_130456; CON_IPI00008359.1; IPI:CON_107456; CON_IPI00787323.2; CON_IPI00306959.10; CON_00166205.2; CON_IPI00406377.3;…	0	906.468	1.56	Medium
	TRUE	Medium	TVRQNLEPLFEQYINNLR	2xDeamidated [Q4; Q12]	4	5	8	CON_IPI00293665.9; CON_00300725.7; CON_00299145.9; CON_00009867.3	1	2249.16	1.22	Medium
	TRUE	Low	ALYDAELSQMQTHISDTSVVLSMDNNRNLDLDSIIAEVK	1xOxidation [M]	3	4	2	CON_IPI00293665.9; CON_00300725.7; CON_00299145.9	1	4365.12	1.11	Low
	TRUE	Low	NMQDLVEDLKNKYEDEINK	1xDeamidated [N18]	2	3	2	CON_IPI00293665.9; CON_00299145.9	2	2339.11	1.07	Low
	TRUE	Low	KQCASLQAAIADAEQRGEMALK		1	1	1	CON_00299145.9	2	2332.17	0.96	Low
	TRUE	Low	KQCASLQAAIADAEQR		1	1	7	CON_00299145.9	1	1702.85	0.95	Low
	TRUE	Low	ISIGGGSCAISGGYGSR	1xC29H38O4 [C8]	3	4	1	CON_IPI00293665.9; CON_00300725.7; CON_00299145.9	0	1992.01	0.95	Low
	TRUE	Low	SEIDHVKKQCASLQAAIADAEQR	3xDeamidated [Q9; Q14; Q22]; 1xC29H38O4 [C10]	1	1	1	CON_00299145.9	2	2964.49	0.83	Low
	TRUE	Low	KQCASLQAAIADAEQR	3xDeamidated [Q2; Q7; Q15]; 1xC29H38O4 [C3]	1	1	2	CON_00299145.9	1	2156.08	0.79	Low
	TRUE	Low	NTKQEIAEINRMIQR	2xDeamidated [Q4; Q/N]	4	5	3	CON_IPI00293665.9; CON_00300725.7; CON_00131368.3; CON_00299145.9	2	1845.95	0.78	Low
	TRUE	Low	MASTSTTIRSHSSSRR	1xOxidation [M1]	3	4	1	CON_IPI00293665.9; CON_00300725.7; CON_00299145.9	2	1780.87	0.75	Low
	TRUE	Low	LDSELRNMQDLVEDLK	1xDeamidated [N/Q]	2	3	3	CON_IPI00293665.9; CON_00299145.9	1	1918.94	0.75	Low
	TRUE	Low	KQCASLQAAIADAEQR	1xC29H38O4 [C3]	1	1	1	CON_00299145.9	1	2153.13	0.74	Low
	TRUE	Low	GEMALKDAKNK	1xDeamidated [N10]	3	4	3	CON_IPI00293665.9; CON_00300725.7; CON_00299145.9	2	1205.62	0.73	Low
	TRUE	Low	QNLEPLFEQYINNLR	2xDeamidated [N/Q]	4	5	7	CON_IPI00293665.9; CON_00300725.7; CON_00299145.9; CON_00009867.3	0	1892.94	0.71	Low
	TRUE	Low	QNLEPLFEQYINNLR		4	5	2	CON_IPI00293665.9; CON_00300725.7; CON_00299145.9; CON_00009867.3	0	1890.97	0.7	Low
	TRUE	Low	SEIDHVKKQCASLQAAIADAEQR		1	1	1	CON_00299145.9	2	2511.26	0.69	Low
	TRUE	Low	TVRQNLEPLFEQYINNLR	3xDeamidated [N16; N/Q]	4	5	7	CON_IPI00293665.9; CON_00300725.7; CON_00299145.9; CON_00009867.3	1	2250.14	0.67	Low
	TRUE	Low	RTAAENEFVTLK		5	6	1	CON_IPI00290857.2; CON_IPI00293665.9; CON_00300725.7; CON_00131368.3; CON_00299145.9	1	1378.73	0.65	Low
	TRUE	Low	TAAENEFVTLKK	1xDeamidated [N5]	5	6	1	CON_IPI00290857.2; CON_IPI00293665.9; CON_00300725.7; CON_00131368.3; CON_00299145.9	1	1351.71	0.65	Low
	TRUE	Low	KDVDAAYMNKVELQAK		6	7	1	CON_IPI00293665.9; CON_00300725.7; CON_00131368.3; CON_00347096.2; CON_00299145.9; CON_IPI00103481.3	2	1822.94	0.62	Low
	TRUE	Low	KDVDAAYMNKVELQAK	1xDeamidated [N/Q]; 1xOxidation [M8]	6	7	5	CON_IPI00293665.9; CON_00300725.7; CON_00131368.3; CON_00347096.2; CON_00299145.9; CON_IPI00103481.3	2	1839.92	0.61	Low
	TRUE	Low	QNLEPLFEQYINNLRRQLDSIVGER	3xDeamidated [N13; Q/N]	3	4	3	CON_00300725.7; CON_00299145.9; CON_00009867.3	2	3047.54	0.6	Low
	TRUE	Low	SLYGLGGSKRISIGGGSCAISGGYGSR		3	4	1	CON_IPI00293665.9; CON_00300725.7; CON_00299145.9	2	2560.29	0.6	Low
	TRUE	Low	YEELQVTAGR		5	6	2	CON_IPI00005859.3; CON_00300725.7; CON_00131368.3; CON_00221797.1; CON_00299145.9	0	1165.58	0.6	Low
	TRUE	Low	WTLLQEQGTK	2xDeamidated [Q5; Q7]	4	5	1	CON_IPI00293665.9; CON_00300725.7; CON_00299145.9; CON_00009867.3	0	1205.6	0.59	Low
	TRUE	Low	VRFLEQQNK	2xDeamidated [Q6; N8]	28	29	2	IPI:CON_104456; CON_IPI00847342.1; CON_IPI00290857.2; IPI:CON_105456; CON_00124800.2; CON_IPI00005859.3; CON_IPI00293665.9; CON_00300725.7; CON_IPI00241841.9; CON_00131368.3; IPI:CON_106456; CON_00221797.1; CON_00124499.2; IPI:CON_00697851.1; CON_00299145.9; CON_00420312.4; IPI:CON_130456; CON_IPI00008359.1; IPI:CON_107456; CON_IPI00787323.2; CON_IPI00306959.10; CON_00166205.2; CON_IPI00406377.3;…	1	1163.61	0.59	Low
	TRUE	Low	QCASLQAAIADAEQRGEMALKDAK	1xC29H38O4 [C2]	1	1	1	CON_00299145.9	2	2968.52	0.59	Low
	TRUE	Low	AEEREQIKTLNNK	3xDeamidated [Q6; N11; N12]	4	5	1	CON_IPI00005859.3; CON_IPI00293665.9; CON_00300725.7; CON_00299145.9	2	1575.79	0.57	Low
	TRUE	Low	WTLLQEQGTK		4	5	3	CON_IPI00293665.9; CON_00300725.7; CON_00299145.9; CON_00009867.3	0	1203.64	0.55	Low
	TRUE	Low	QNLEPLFEQYINNLR	3xDeamidated [N12; N13; Q/N]	4	5	4	CON_IPI00293665.9; CON_00300725.7; CON_00299145.9; CON_00009867.3	0	1893.92	0.54	Low
	TRUE	Low	ALYDAELSQMQTHISDTSVVLSMDNNRNLDLDSIIAEVK		3	4	1	CON_IPI00293665.9; CON_00300725.7; CON_00299145.9	1	4349.13	0.54	Low
	TRUE	Low	VLDTKWTLLQEQGTKTVR	1xDeamidated [Q]	3	4	2	CON_IPI00293665.9; CON_00299145.9; CON_00009867.3	2	2117.16	0.53	Low
	TRUE	Low	WTLLQEQGTK	1xDeamidated [Q]	4	5	2	CON_IPI00293665.9; CON_00300725.7; CON_00299145.9; CON_00009867.3	0	1204.62	0.53	Low
	TRUE	Low	KDVDAAYMNKVELQAK	2xDeamidated [N9; Q14]	6	7	1	CON_IPI00293665.9; CON_00300725.7; CON_00131368.3; CON_00347096.2; CON_00299145.9; CON_IPI00103481.3	2	1824.9	0.51	Low
	TRUE	Low	MASTSTTIRSHSSSR	1xAcetyl [N-Term]	3	4	1	CON_IPI00293665.9; CON_00300725.7; CON_00299145.9	1	1650.79	0.5	Low
	TRUE	Low	EYQELMNVKLALDVEIATYRK	1xDeamidated [Q/N]; 1xOxidation [M6]	5	6	2	CON_IPI00293665.9; CON_00300725.7; CON_00131368.3; CON_00221797.1; CON_00299145.9	2	2543.31	0.49	Low
	TRUE	Low	TLNNKFASFIDK	1xDeamidated [N]	24	25	7	CON_IPI00847342.1; CON_IPI00290857.2; CON_00622240.4; IPI:CON_105456; CON_IPI00005859.3; CON_IPI00293665.9; CON_00300725.7; CON_IPI00241841.9; CON_00131368.3; CON_00221797.1; CON_00124499.2; IPI:CON_00697851.1; CON_00299145.9; CON_00420312.4; IPI:CON_130456; CON_00021304.1; CON_IPI00017870.1; CON_00462140.1; CON_IPI00008359.1; CON_IPI00306959.10; CON_IPI00406377.3; CON_IPI00554648.3; CON_00139301…	1	1398.73	0.48	Low
	TRUE	Low	KQCASLQAAIADAEQR	1xDeamidated [Q]	1	1	3	CON_00299145.9	1	1703.84	0.48	Low
	TRUE	Low	VRFLEQQNKVLDTK	3xDeamidated [Q6; Q7; N8]	6	7	1	CON_IPI00293665.9; CON_00131368.3; IPI:CON_00697851.1; CON_00299145.9; CON_00139301.3; CON_00009867.3	2	1720.91	0.48	Low
	TRUE	Low	QCASLQAAIADAEQRGEMALK	2xDeamidated [Q6; Q14]; 1xC29H38O4 [C2]	1	1	1	CON_00299145.9	1	2656.32	0.47	Low
	TRUE	Low	NTKQEIAEINRMIQR	1xOxidation [M12]	4	5	1	CON_IPI00293665.9; CON_00300725.7; CON_00131368.3; CON_00299145.9	2	1859.98	0.47	Low
	TRUE	Low	WTLLQEQGTKTVRQNLEPLFEQYINNLR		4	5	1	CON_IPI00293665.9; CON_00300725.7; CON_00299145.9; CON_00009867.3	2	3431.81	0.45	Low
	TRUE	Low	GSGGLGGACGGAGFGSRSLYGLGGSKR	1xC29H38O4 [C9]	3	4	1	CON_IPI00293665.9; CON_00300725.7; CON_00299145.9	2	2836.44	0.44	Low
	TRUE	Low	NTKQEIAEINRMIQR		4	5	3	CON_IPI00293665.9; CON_00300725.7; CON_00131368.3; CON_00299145.9	2	1843.98	0.42	Low
	TRUE	Low	QCASLQAAIADAEQRGEMALK		1	1	1	CON_00299145.9	1	2204.08	0.42	Low
	TRUE	Low	LDSELRNMQDLVEDLKNK	1xDeamidated [N/Q]; 1xOxidation [M8]	2	3	2	CON_IPI00293665.9; CON_00299145.9	2	2177.08	0.41	Low
	TRUE	Low	KQCASLQAAIADAEQR	2xDeamidated [Q7; Q]	1	1	2	CON_00299145.9	1	1704.82	0.38	Low
	TRUE	Low	AEEREQIKTLNNK	1xDeamidated [N]	4	5	3	CON_IPI00005859.3; CON_IPI00293665.9; CON_00300725.7; CON_00299145.9	2	1573.82	0.37	Low
	TRUE	Low	SHSSSRRGFSANSAR		3	3	1	CON_IPI00293665.9; CON_00300725.7; CON_00299145.9	2	1606.78	0.35	Low
	TRUE	Low	NLDLDSIIAEVKAQYEEIAQR		4	5	2	CON_IPI00293665.9; CON_00300725.7; CON_00299145.9; CON_00021304.1	1	2418.25	0.34	Low
	TRUE	Low	WTLLQEQGTKTVR	1xDeamidated [Q]	4	5	4	CON_IPI00293665.9; CON_00300725.7; CON_00299145.9; CON_00009867.3	1	1560.84	0.34	Low
	TRUE	Low	QCASLQAAIADAEQRGEMALK	2xDeamidated [Q1; Q6]; 1xOxidation [M18]	1	1	1	CON_00299145.9	1	2222.04	0.34	Low
	TRUE	Low	GRLDSELRNMQDLVEDLK	2xDeamidated [N9; Q11]; 1xOxidation [M10]	2	3	1	CON_IPI00293665.9; CON_00299145.9	2	2149.04	0.33	Low
	TRUE	Low	QCASLQAAIADAEQRGEMALK	3xDeamidated [Q1; Q6; Q14]; 1xC29H38O4 [C2]	1	1	2	CON_00299145.9	1	2657.31	0.33	Low
	TRUE	Low	TAAENEFVTLKKDVDAAYMNK	1xOxidation [M19]	4	5	1	CON_IPI00293665.9; CON_00300725.7; CON_00131368.3; CON_00299145.9	2	2374.16	0.32	Low
	TRUE	Low	YEELQVTAGRHGDDLRNTK	2xDeamidated [Q5; N17]	5	6	1	CON_IPI00005859.3; CON_00300725.7; CON_00131368.3; CON_00221797.1; CON_00299145.9	2	2204.06	0.29	Low
	TRUE	Low	SRGSGGLGGACGGAGFGSR	1xC29H38O4 [C11]	3	4	1	CON_IPI00293665.9; CON_00300725.7; CON_00299145.9	1	2061.02	0.26	Low
	TRUE	Low	QEIAEINR		4	5	1	CON_IPI00293665.9; CON_00300725.7; CON_00131368.3; CON_00299145.9	0	972.511	0.25	Low
	TRUE	Low	MASTSTTIRSHSSSR	1xOxidation [M1]	3	4	1	CON_IPI00293665.9; CON_00300725.7; CON_00299145.9	1	1624.77	0.25	Low
	TRUE	Low	QCASLQAAIADAEQR	1xDeamidated [Q]; 1xC29H38O4 [C2]	1	1	3	CON_00299145.9	0	2026.02	0.25	Low
	TRUE	Low	AEEREQIKTLNNK		4	5	1	CON_IPI00005859.3; CON_IPI00293665.9; CON_00300725.7; CON_00299145.9	2	1572.83	0.25	Low
	TRUE	Low	GRLDSELRNMQDLVEDLK	1xDeamidated [Q/N]; 1xOxidation [M10]	2	3	2	CON_IPI00293665.9; CON_00299145.9	2	2148.06	0.24	Low
	TRUE	Low	WTLLQEQGTKTVR	2xDeamidated [Q5; Q7]	4	5	1	CON_IPI00293665.9; CON_00300725.7; CON_00299145.9; CON_00009867.3	1	1561.82	0.24	Low
	TRUE	Low	NMQDLVEDLKNK	3xDeamidated [N1; Q3; N11]; 1xOxidation [M2]	2	3	1	CON_IPI00293665.9; CON_00299145.9	1	1465.67	0.24	Low
	TRUE	Low	NKLEGLEDALQK	2xDeamidated [N1; Q11]	3	4	1	CON_IPI00293665.9; CON_00300725.7; CON_00299145.9	1	1359.7	0.23	Low
	TRUE	Low	LDSELRNMQDLVEDLK		2	3	1	CON_IPI00293665.9; CON_00299145.9	1	1917.96	0.22	Low
	TRUE	Low	LLKEYQELMNVK		4	5	1	CON_IPI00293665.9; CON_00300725.7; CON_00131368.3; CON_00299145.9	1	1507.82	0.21	Low
	TRUE	Low	QCASLQAAIADAEQR	3xDeamidated [Q1; Q6; Q14]; 1xC29H38O4 [C2]	1	1	1	CON_00299145.9	0	2027.99	0.21	Low
	TRUE	Low	QCASLQAAIADAEQRGEMALKDAK	2xDeamidated [Q6; Q]; 1xOxidation [M18]	1	1	3	CON_00299145.9	2	2536.2	0.21	Low
	TRUE	Low	NTKQEIAEINRMIQR	2xDeamidated [Q4; Q14]; 1xOxidation [M12]	4	5	1	CON_IPI00293665.9; CON_00300725.7; CON_00131368.3; CON_00299145.9	2	1861.94	0.21	Low
	TRUE	Low	KDVDAAYMNKVELQAK	2xDeamidated [N9; Q14]; 1xOxidation [M8]	6	7	1	CON_IPI00293665.9; CON_00300725.7; CON_00131368.3; CON_00347096.2; CON_00299145.9; CON_IPI00103481.3	2	1840.9	0.21	Low
	TRUE	Low	MASTSTTIRSHSSSR		3	4	2	CON_IPI00293665.9; CON_00300725.7; CON_00299145.9	1	1608.78	0.2	Low
	TRUE	Low	RTAAENEFVTLKK	1xDeamidated [N6]	5	6	1	CON_IPI00290857.2; CON_IPI00293665.9; CON_00300725.7; CON_00131368.3; CON_00299145.9	2	1507.81	0.2	Low
	TRUE	Low	DVDAAYMNK	1xDeamidated [N8]; 1xOxidation [M7]	10	11	1	CON_IPI00005859.3; CON_IPI00293665.9; CON_00300725.7; CON_00131368.3; CON_00347096.2; IPI:CON_00697851.1; CON_00299145.9; CON_IPI00103481.3; CON_00139301.3; CON_00009867.3	0	1043.43	0.19	Low
	TRUE	Low	KDVDAAYMNKVELQAK	1xDeamidated [Q/N]	6	7	2	CON_IPI00293665.9; CON_00300725.7; CON_00131368.3; CON_00347096.2; CON_00299145.9; CON_IPI00103481.3	2	1823.92	0.18	Low
	TRUE	Low	MIQRLR	1xDeamidated [Q3]	13	14	1	CON_IPI00290857.2; CON_IPI00005859.3; CON_IPI00293665.9; CON_00300725.7; CON_00131368.3; CON_00221797.1; IPI:CON_00697851.1; CON_00299145.9; CON_00420312.4; CON_IPI00008359.1; CON_IPI00290078.5; CON_00139301.3; CON_00009867.3	1	817.471	0.17	Low
	TRUE	Low	DVDAAYMNKVELQAK	2xDeamidated [N8; Q13]; 1xOxidation [M7]	6	7	1	CON_IPI00293665.9; CON_00300725.7; CON_00131368.3; CON_00347096.2; CON_00299145.9; CON_IPI00103481.3	1	1712.8	0.16	Low
	TRUE	Low	TLNNKFASFIDK	2xDeamidated [N3; N4]	24	25	2	CON_IPI00847342.1; CON_IPI00290857.2; CON_00622240.4; IPI:CON_105456; CON_IPI00005859.3; CON_IPI00293665.9; CON_00300725.7; CON_IPI00241841.9; CON_00131368.3; CON_00221797.1; CON_00124499.2; IPI:CON_00697851.1; CON_00299145.9; CON_00420312.4; IPI:CON_130456; CON_00021304.1; CON_IPI00017870.1; CON_00462140.1; CON_IPI00008359.1; CON_IPI00306959.10; CON_IPI00406377.3; CON_IPI00554648.3; CON_00139301…	1	1399.71	0.15	Low
	TRUE	Low	TLNNKFASFIDKVR	2xDeamidated [N3; N4]	23	24	1	CON_IPI00847342.1; CON_IPI00290857.2; CON_00622240.4; IPI:CON_105456; CON_IPI00005859.3; CON_IPI00293665.9; CON_00300725.7; CON_IPI00241841.9; CON_00131368.3; CON_00221797.1; CON_00124499.2; IPI:CON_00697851.1; CON_00299145.9; CON_00420312.4; IPI:CON_130456; CON_00021304.1; CON_00462140.1; CON_IPI00008359.1; CON_IPI00306959.10; CON_IPI00406377.3; CON_IPI00554648.3; CON_00139301.3; CON_00009867.3	2	1654.88	0.15	Low
	TRUE	Low	NMQDLVEDLK	1xDeamidated [Q/N]	2	3	2	CON_IPI00293665.9; CON_00299145.9	0	1205.57	0.14	Low
	TRUE	Low	GEMALKDAKNK	1xOxidation [M3]	3	4	1	CON_IPI00293665.9; CON_00300725.7; CON_00299145.9	2	1220.63	0.13	Low
	TRUE	Low	GRLDSELR		8	9	1	CON_IPI00293665.9; CON_00300725.7; CON_IPI00241841.9; CON_00131368.3; IPI:CON_00697851.1; CON_00299145.9; CON_00139301.3; CON_00009867.3	1	945.511	0.12	Low
	TRUE	Low	VLDTKWTLLQEQGTKTVR		3	4	1	CON_IPI00293665.9; CON_00299145.9; CON_00009867.3	2	2116.18	0.12	Low
	TRUE	Low	ISIGGGSCAISGGYGSR		3	4	1	CON_IPI00293665.9; CON_00300725.7; CON_00299145.9	0	1541.74	0.12	Low
	TRUE	Low	LDSELRNMQDLVEDLKNK	1xDeamidated [N17]	2	3	1	CON_IPI00293665.9; CON_00299145.9	2	2161.08	0.12	Low
	TRUE	Low	AEAESWYQTKYEELQVTAGR	2xDeamidated [Q8; Q15]	5	6	1	CON_IPI00005859.3; CON_00300725.7; CON_00131368.3; CON_00221797.1; CON_00299145.9	1	2361.09	0.11	Low
	TRUE	Low	QDLARLLK		3	4	1	CON_IPI00293665.9; CON_00300725.7; CON_00299145.9	1	956.589	0.09	Low
	TRUE	Low	QLDSIVGERGRLDSELR		3	4	1	CON_00300725.7; CON_00299145.9; CON_00009867.3	2	1943.03	0.08	Low
	TRUE	Low	YEDEINKR	1xDeamidated [N6]	20	21	1	CON_IPI00748057.2; CON_IPI00290857.2; CON_00622240.4; CON_IPI00376379.3; CON_IPI00005859.3; CON_IPI00293665.9; CON_00300725.7; IPI:CON_00714876.1; CON_00131368.3; CON_00221797.1; CON_00124499.2; IPI:CON_00697851.1; CON_00299145.9; CON_00021304.1; CON_00462140.1; CON_IPI00008359.1; CON_00220327.3; CON_IPI00554648.3; CON_00139301.3; CON_00009867.3	1	1067.5	0.08	Low
	TRUE	Low	NMQDLVEDLK	1xOxidation [M2]	2	3	1	CON_IPI00293665.9; CON_00299145.9	0	1220.58	0.05	Low
	TRUE	Low	LEGLEDALQKAKQDLAR	1xDeamidated [Q]	3	4	2	CON_IPI00293665.9; CON_00300725.7; CON_00299145.9	2	1899.02	0.04	Low
	TRUE	Low	NKYEDEINK	2xDeamidated [N1; N8]	14	15	1	CON_IPI00748057.2; CON_IPI00293665.9; CON_00300725.7; CON_IPI00241841.9; CON_00124499.2; IPI:CON_00697851.1; CON_00299145.9; CON_IPI00017870.1; CON_00462140.1; CON_00220327.3; CON_IPI00787323.2; CON_IPI00554648.3; CON_00139301.3; CON_00009867.3	1	1154.52	0.03	Low
TRUE	Master Protein	CON_00300725.7	Keratin, type II cytoskeletal 6A	66.1348	61	204	7	1	564	60	8	20.17	61
	Checked	Confidence	Sequence	Modifications	# Protein Groups	# Proteins	# PSMs	Master Protein Accessions	# Missed Cleavages	Theo. MH+ [Da]	XCorr Sequest HT	Confidence Sequest HT
	TRUE	High	TLNNKFASFIDKVR		23	24	3	CON_IPI00847342.1; CON_IPI00290857.2; CON_00622240.4; IPI:CON_105456; CON_IPI00005859.3; CON_IPI00293665.9; CON_00300725.7; CON_IPI00241841.9; CON_00131368.3; CON_00221797.1; CON_00124499.2; IPI:CON_00697851.1; CON_00299145.9; CON_00420312.4; IPI:CON_130456; CON_00021304.1; CON_00462140.1; CON_IPI00008359.1; CON_IPI00306959.10; CON_IPI00406377.3; CON_IPI00554648.3; CON_00139301.3; CON_00009867.3	2	1652.91	4.51	High
	TRUE	High	NKYEDEINKR		11	12	5	CON_IPI00748057.2; CON_IPI00293665.9; CON_00300725.7; CON_00124499.2; IPI:CON_00697851.1; CON_00299145.9; CON_00462140.1; CON_00220327.3; CON_IPI00554648.3; CON_00139301.3; CON_00009867.3	2	1308.65	2.8	High
	TRUE	High	FASFIDKVR		31	32	1	CON_IPI00847342.1; CON_IPI00329306.3; CON_IPI00290857.2; CON_00622240.4; CON_IPI00174775.2; CON_00468956.4; IPI:CON_105456; CON_00347110.2; CON_IPI00376379.3; CON_IPI00005859.3; CON_IPI00293665.9; CON_00300725.7; CON_IPI00241841.9; CON_00131368.3; CON_00347096.2; CON_00221797.1; CON_00124499.2; IPI:CON_00697851.1; CON_00299145.9; CON_00420312.4; IPI:CON_130456; CON_00021304.1; CON_00462140.1; CON…	1	1082.6	2.64	High
	TRUE	High	QLDSIVGER		3	4	1	CON_00300725.7; CON_00299145.9; CON_00009867.3	0	1016.54	2.58	High
	TRUE	High	AQYEEIAQR		6	7	1	CON_IPI00293665.9; CON_00300725.7; IPI:CON_00714876.1; CON_00299145.9; CON_00021304.1; CON_IPI00290078.5	0	1107.54	2.55	High
	TRUE	Medium	FLEQQNK		28	29	2	IPI:CON_104456; CON_IPI00847342.1; CON_IPI00290857.2; IPI:CON_105456; CON_00124800.2; CON_IPI00005859.3; CON_IPI00293665.9; CON_00300725.7; CON_IPI00241841.9; CON_00131368.3; IPI:CON_106456; CON_00221797.1; CON_00124499.2; IPI:CON_00697851.1; CON_00299145.9; CON_00420312.4; IPI:CON_130456; CON_IPI00008359.1; IPI:CON_107456; CON_IPI00787323.2; CON_IPI00306959.10; CON_00166205.2; CON_IPI00406377.3;…	0	906.468	1.56	Medium
	TRUE	Medium	FLEQQNKVLETK		9	9	2	CON_IPI00290857.2; CON_IPI00005859.3; CON_00300725.7; CON_IPI00241841.9; CON_00221797.1; CON_00124499.2; CON_00420312.4; CON_IPI00008359.1; CON_00166205.2	1	1476.81	1.25	Medium
	TRUE	Medium	TVRQNLEPLFEQYINNLR	2xDeamidated [Q4; Q12]	4	5	8	CON_IPI00293665.9; CON_00300725.7; CON_00299145.9; CON_00009867.3	1	2249.16	1.22	Medium
	TRUE	Low	ALYDAELSQMQTHISDTSVVLSMDNNRNLDLDSIIAEVK	1xOxidation [M]	3	4	2	CON_IPI00293665.9; CON_00300725.7; CON_00299145.9	1	4365.12	1.11	Low
	TRUE	Low	ISIGGGSCAISGGYGSR	1xC29H38O4 [C8]	3	4	1	CON_IPI00293665.9; CON_00300725.7; CON_00299145.9	0	1992.01	0.95	Low
	TRUE	Low	FLEQQNKVLETKWTLLQEQGTK	1xDeamidated [N/Q]	1	1	7	CON_00300725.7	2	2662.41	0.93	Low
	TRUE	Low	SEIDHVKKQCANLQAAIADAEQR	1xDeamidated [Q14]; 1xC29H38O4 [C10]	3	4	1	CON_IPI00293665.9; CON_00300725.7; CON_00131368.3	2	2989.53	0.88	Low
	TRUE	Low	NTKQEIAEINRMIQR	2xDeamidated [Q4; Q/N]	4	5	3	CON_IPI00293665.9; CON_00300725.7; CON_00131368.3; CON_00299145.9	2	1845.95	0.78	Low
	TRUE	Low	MASTSTTIRSHSSSRR	1xOxidation [M1]	3	4	1	CON_IPI00293665.9; CON_00300725.7; CON_00299145.9	2	1780.87	0.75	Low
	TRUE	Low	GEMALKDAKNK	1xDeamidated [N10]	3	4	3	CON_IPI00293665.9; CON_00300725.7; CON_00299145.9	2	1205.62	0.73	Low
	TRUE	Low	KQCANLQAAIADAEQRGEMALK	1xDeamidated [Q/N]	3	4	10	CON_IPI00293665.9; CON_00300725.7; CON_00131368.3	2	2360.17	0.73	Low
	TRUE	Low	QNLEPLFEQYINNLR	2xDeamidated [N/Q]	4	5	7	CON_IPI00293665.9; CON_00300725.7; CON_00299145.9; CON_00009867.3	0	1892.94	0.71	Low
	TRUE	Low	QNLEPLFEQYINNLR		4	5	2	CON_IPI00293665.9; CON_00300725.7; CON_00299145.9; CON_00009867.3	0	1890.97	0.7	Low
	TRUE	Low	TVRQNLEPLFEQYINNLR	3xDeamidated [N16; N/Q]	4	5	7	CON_IPI00293665.9; CON_00300725.7; CON_00299145.9; CON_00009867.3	1	2250.14	0.67	Low
	TRUE	Low	RTAAENEFVTLK		5	6	1	CON_IPI00290857.2; CON_IPI00293665.9; CON_00300725.7; CON_00131368.3; CON_00299145.9	1	1378.73	0.65	Low
	TRUE	Low	TAAENEFVTLKK	1xDeamidated [N5]	5	6	1	CON_IPI00290857.2; CON_IPI00293665.9; CON_00300725.7; CON_00131368.3; CON_00299145.9	1	1351.71	0.65	Low
	TRUE	Low	KQCANLQAAIADAEQRGEMALK	3xDeamidated [Q2; Q7; N/Q]	3	4	3	CON_IPI00293665.9; CON_00300725.7; CON_00131368.3	2	2362.14	0.64	Low
	TRUE	Low	KDVDAAYMNKVELQAK		6	7	1	CON_IPI00293665.9; CON_00300725.7; CON_00131368.3; CON_00347096.2; CON_00299145.9; CON_IPI00103481.3	2	1822.94	0.62	Low
	TRUE	Low	FLEQQNKVLETKWTLLQEQGTK	2xDeamidated [Q5; Q17]	1	1	1	CON_00300725.7	2	2663.39	0.62	Low
	TRUE	Low	KDVDAAYMNKVELQAK	1xDeamidated [N/Q]; 1xOxidation [M8]	6	7	5	CON_IPI00293665.9; CON_00300725.7; CON_00131368.3; CON_00347096.2; CON_00299145.9; CON_IPI00103481.3	2	1839.92	0.61	Low
	TRUE	Low	QNLEPLFEQYINNLRRQLDSIVGER	3xDeamidated [N13; Q/N]	3	4	3	CON_00300725.7; CON_00299145.9; CON_00009867.3	2	3047.54	0.6	Low
	TRUE	Low	SLYGLGGSKRISIGGGSCAISGGYGSR		3	4	1	CON_IPI00293665.9; CON_00300725.7; CON_00299145.9	2	2560.29	0.6	Low
	TRUE	Low	YEELQVTAGR		5	6	2	CON_IPI00005859.3; CON_00300725.7; CON_00131368.3; CON_00221797.1; CON_00299145.9	0	1165.58	0.6	Low
	TRUE	Low	WTLLQEQGTK	2xDeamidated [Q5; Q7]	4	5	1	CON_IPI00293665.9; CON_00300725.7; CON_00299145.9; CON_00009867.3	0	1205.6	0.59	Low
	TRUE	Low	VRFLEQQNK	2xDeamidated [Q6; N8]	28	29	2	IPI:CON_104456; CON_IPI00847342.1; CON_IPI00290857.2; IPI:CON_105456; CON_00124800.2; CON_IPI00005859.3; CON_IPI00293665.9; CON_00300725.7; CON_IPI00241841.9; CON_00131368.3; IPI:CON_106456; CON_00221797.1; CON_00124499.2; IPI:CON_00697851.1; CON_00299145.9; CON_00420312.4; IPI:CON_130456; CON_IPI00008359.1; IPI:CON_107456; CON_IPI00787323.2; CON_IPI00306959.10; CON_00166205.2; CON_IPI00406377.3;…	1	1163.61	0.59	Low
	TRUE	Low	AEEREQIKTLNNK	3xDeamidated [Q6; N11; N12]	4	5	1	CON_IPI00005859.3; CON_IPI00293665.9; CON_00300725.7; CON_00299145.9	2	1575.79	0.57	Low
	TRUE	Low	WTLLQEQGTK		4	5	3	CON_IPI00293665.9; CON_00300725.7; CON_00299145.9; CON_00009867.3	0	1203.64	0.55	Low
	TRUE	Low	QNLEPLFEQYINNLR	3xDeamidated [N12; N13; Q/N]	4	5	4	CON_IPI00293665.9; CON_00300725.7; CON_00299145.9; CON_00009867.3	0	1893.92	0.54	Low
	TRUE	Low	ALYDAELSQMQTHISDTSVVLSMDNNRNLDLDSIIAEVK		3	4	1	CON_IPI00293665.9; CON_00300725.7; CON_00299145.9	1	4349.13	0.54	Low
	TRUE	Low	KQCANLQAAIADAEQR	3xDeamidated [Q2; Q7; Q15]; 1xC29H38O4 [C3]	3	4	1	CON_IPI00293665.9; CON_00300725.7; CON_00131368.3	1	2183.09	0.54	Low
	TRUE	Low	QCANLQAAIADAEQR	3xDeamidated [Q1; Q6; Q14]	3	4	1	CON_IPI00293665.9; CON_00300725.7; CON_00131368.3	0	1604.72	0.53	Low
	TRUE	Low	WTLLQEQGTK	1xDeamidated [Q]	4	5	2	CON_IPI00293665.9; CON_00300725.7; CON_00299145.9; CON_00009867.3	0	1204.62	0.53	Low
	TRUE	Low	KQCANLQAAIADAEQR	1xDeamidated [Q/N]; 1xC29H38O4 [C3]	3	4	4	CON_IPI00293665.9; CON_00300725.7; CON_00131368.3	1	2181.13	0.52	Low
	TRUE	Low	KDVDAAYMNKVELQAK	2xDeamidated [N9; Q14]	6	7	1	CON_IPI00293665.9; CON_00300725.7; CON_00131368.3; CON_00347096.2; CON_00299145.9; CON_IPI00103481.3	2	1824.9	0.51	Low
	TRUE	Low	MASTSTTIRSHSSSR	1xAcetyl [N-Term]	3	4	1	CON_IPI00293665.9; CON_00300725.7; CON_00299145.9	1	1650.79	0.5	Low
	TRUE	Low	EYQELMNVKLALDVEIATYRK	1xDeamidated [Q/N]; 1xOxidation [M6]	5	6	2	CON_IPI00293665.9; CON_00300725.7; CON_00131368.3; CON_00221797.1; CON_00299145.9	2	2543.31	0.49	Low
	TRUE	Low	TLNNKFASFIDK	1xDeamidated [N]	24	25	7	CON_IPI00847342.1; CON_IPI00290857.2; CON_00622240.4; IPI:CON_105456; CON_IPI00005859.3; CON_IPI00293665.9; CON_00300725.7; CON_IPI00241841.9; CON_00131368.3; CON_00221797.1; CON_00124499.2; IPI:CON_00697851.1; CON_00299145.9; CON_00420312.4; IPI:CON_130456; CON_00021304.1; CON_IPI00017870.1; CON_00462140.1; CON_IPI00008359.1; CON_IPI00306959.10; CON_IPI00406377.3; CON_IPI00554648.3; CON_00139301…	1	1398.73	0.48	Low
	TRUE	Low	KQCANLQAAIADAEQR	3xDeamidated [Q2; Q7; N/Q]	3	4	2	CON_IPI00293665.9; CON_00300725.7; CON_00131368.3	1	1732.82	0.47	Low
	TRUE	Low	NTKQEIAEINRMIQR	1xOxidation [M12]	4	5	1	CON_IPI00293665.9; CON_00300725.7; CON_00131368.3; CON_00299145.9	2	1859.98	0.47	Low
	TRUE	Low	WTLLQEQGTKTVRQNLEPLFEQYINNLR		4	5	1	CON_IPI00293665.9; CON_00300725.7; CON_00299145.9; CON_00009867.3	2	3431.81	0.45	Low
	TRUE	Low	QCANLQAAIADAEQRGEMALK	1xOxidation [M18]	3	4	2	CON_IPI00293665.9; CON_00300725.7; CON_00131368.3	1	2247.09	0.45	Low
	TRUE	Low	GSGGLGGACGGAGFGSRSLYGLGGSKR	1xC29H38O4 [C9]	3	4	1	CON_IPI00293665.9; CON_00300725.7; CON_00299145.9	2	2836.44	0.44	Low
	TRUE	Low	NTKQEIAEINRMIQR		4	5	3	CON_IPI00293665.9; CON_00300725.7; CON_00131368.3; CON_00299145.9	2	1843.98	0.42	Low
	TRUE	Low	QCANLQAAIADAEQR	1xDeamidated [N/Q]	3	4	5	CON_IPI00293665.9; CON_00300725.7; CON_00131368.3	0	1602.75	0.42	Low
	TRUE	Low	KQCANLQAAIADAEQRGEMALK	1xDeamidated [Q/N]; 1xC29H38O4 [C3]	3	4	5	CON_IPI00293665.9; CON_00300725.7; CON_00131368.3	2	2810.45	0.39	Low
	TRUE	Low	AEEREQIKTLNNK	1xDeamidated [N]	4	5	3	CON_IPI00005859.3; CON_IPI00293665.9; CON_00300725.7; CON_00299145.9	2	1573.82	0.37	Low
	TRUE	Low	FLEQQNKVLETK	2xDeamidated [Q4; Q/N]	9	9	2	CON_IPI00290857.2; CON_IPI00005859.3; CON_00300725.7; CON_IPI00241841.9; CON_00221797.1; CON_00124499.2; CON_00420312.4; CON_IPI00008359.1; CON_00166205.2	1	1478.77	0.36	Low
	TRUE	Low	SHSSSRRGFSANSAR		3	3	1	CON_IPI00293665.9; CON_00300725.7; CON_00299145.9	2	1606.78	0.35	Low
	TRUE	Low	VLETKWTLLQEQGTKTVR		1	1	4	CON_00300725.7	2	2130.19	0.35	Low
	TRUE	Low	KQCANLQAAIADAEQRGEMALK		3	4	1	CON_IPI00293665.9; CON_00300725.7; CON_00131368.3	2	2359.19	0.34	Low
	TRUE	Low	NLDLDSIIAEVKAQYEEIAQR		4	5	2	CON_IPI00293665.9; CON_00300725.7; CON_00299145.9; CON_00021304.1	1	2418.25	0.34	Low
	TRUE	Low	WTLLQEQGTKTVR	1xDeamidated [Q]	4	5	4	CON_IPI00293665.9; CON_00300725.7; CON_00299145.9; CON_00009867.3	1	1560.84	0.34	Low
	TRUE	Low	TAAENEFVTLKKDVDAAYMNK	1xOxidation [M19]	4	5	1	CON_IPI00293665.9; CON_00300725.7; CON_00131368.3; CON_00299145.9	2	2374.16	0.32	Low
	TRUE	Low	GRLDSELRGMQDLVEDFK		1	1	1	CON_00300725.7	2	2108.04	0.3	Low
	TRUE	Low	KQCANLQAAIADAEQR		3	4	1	CON_IPI00293665.9; CON_00300725.7; CON_00131368.3	1	1729.86	0.3	Low
	TRUE	Low	YEELQVTAGRHGDDLRNTK	2xDeamidated [Q5; N17]	5	6	1	CON_IPI00005859.3; CON_00300725.7; CON_00131368.3; CON_00221797.1; CON_00299145.9	2	2204.06	0.29	Low
	TRUE	Low	VLETKWTLLQEQGTKTVR	2xDeamidated [Q10; Q12]	1	1	3	CON_00300725.7	2	2132.16	0.28	Low
	TRUE	Low	VLETKWTLLQEQGTK	2xDeamidated [Q10; Q12]	1	1	1	CON_00300725.7	1	1775.94	0.28	Low
	TRUE	Low	KQCANLQAAIADAEQRGEMALK	3xDeamidated [Q2; N5; Q7]; 1xC29H38O4 [C3]	3	4	1	CON_IPI00293665.9; CON_00300725.7; CON_00131368.3	2	2812.41	0.27	Low
	TRUE	Low	SRGSGGLGGACGGAGFGSR	1xC29H38O4 [C11]	3	4	1	CON_IPI00293665.9; CON_00300725.7; CON_00299145.9	1	2061.02	0.26	Low
	TRUE	Low	QEIAEINR		4	5	1	CON_IPI00293665.9; CON_00300725.7; CON_00131368.3; CON_00299145.9	0	972.511	0.25	Low
	TRUE	Low	MASTSTTIRSHSSSR	1xOxidation [M1]	3	4	1	CON_IPI00293665.9; CON_00300725.7; CON_00299145.9	1	1624.77	0.25	Low
	TRUE	Low	AEEREQIKTLNNK		4	5	1	CON_IPI00005859.3; CON_IPI00293665.9; CON_00300725.7; CON_00299145.9	2	1572.83	0.25	Low
	TRUE	Low	WTLLQEQGTKTVR	2xDeamidated [Q5; Q7]	4	5	1	CON_IPI00293665.9; CON_00300725.7; CON_00299145.9; CON_00009867.3	1	1561.82	0.24	Low
	TRUE	Low	KQCANLQAAIADAEQR	2xDeamidated [Q/N]; 1xC29H38O4 [C3]	3	4	3	CON_IPI00293665.9; CON_00300725.7; CON_00131368.3	1	2182.11	0.24	Low
	TRUE	Low	NKLEGLEDALQK	2xDeamidated [N1; Q11]	3	4	1	CON_IPI00293665.9; CON_00300725.7; CON_00299145.9	1	1359.7	0.23	Low
	TRUE	Low	FLEQQNKVLETK	3xDeamidated [Q4; Q5; N6]	9	9	1	CON_IPI00290857.2; CON_IPI00005859.3; CON_00300725.7; CON_IPI00241841.9; CON_00221797.1; CON_00124499.2; CON_00420312.4; CON_IPI00008359.1; CON_00166205.2	1	1479.76	0.22	Low
	TRUE	Low	VRFLEQQNKVLETK		9	9	1	CON_IPI00290857.2; CON_IPI00005859.3; CON_00300725.7; CON_IPI00241841.9; CON_00221797.1; CON_00124499.2; CON_00420312.4; CON_IPI00008359.1; CON_00166205.2	2	1731.98	0.22	Low
	TRUE	Low	LLKEYQELMNVK		4	5	1	CON_IPI00293665.9; CON_00300725.7; CON_00131368.3; CON_00299145.9	1	1507.82	0.21	Low
	TRUE	Low	NTKQEIAEINRMIQR	2xDeamidated [Q4; Q14]; 1xOxidation [M12]	4	5	1	CON_IPI00293665.9; CON_00300725.7; CON_00131368.3; CON_00299145.9	2	1861.94	0.21	Low
	TRUE	Low	KDVDAAYMNKVELQAK	2xDeamidated [N9; Q14]; 1xOxidation [M8]	6	7	1	CON_IPI00293665.9; CON_00300725.7; CON_00131368.3; CON_00347096.2; CON_00299145.9; CON_IPI00103481.3	2	1840.9	0.21	Low
	TRUE	Low	MASTSTTIRSHSSSR		3	4	2	CON_IPI00293665.9; CON_00300725.7; CON_00299145.9	1	1608.78	0.2	Low
	TRUE	Low	RTAAENEFVTLKK	1xDeamidated [N6]	5	6	1	CON_IPI00290857.2; CON_IPI00293665.9; CON_00300725.7; CON_00131368.3; CON_00299145.9	2	1507.81	0.2	Low
	TRUE	Low	DVDAAYMNK	1xDeamidated [N8]; 1xOxidation [M7]	10	11	1	CON_IPI00005859.3; CON_IPI00293665.9; CON_00300725.7; CON_00131368.3; CON_00347096.2; IPI:CON_00697851.1; CON_00299145.9; CON_IPI00103481.3; CON_00139301.3; CON_00009867.3	0	1043.43	0.19	Low
	TRUE	Low	KDVDAAYMNKVELQAK	1xDeamidated [Q/N]	6	7	2	CON_IPI00293665.9; CON_00300725.7; CON_00131368.3; CON_00347096.2; CON_00299145.9; CON_IPI00103481.3	2	1823.92	0.18	Low
	TRUE	Low	MIQRLR	1xDeamidated [Q3]	13	14	1	CON_IPI00290857.2; CON_IPI00005859.3; CON_IPI00293665.9; CON_00300725.7; CON_00131368.3; CON_00221797.1; IPI:CON_00697851.1; CON_00299145.9; CON_00420312.4; CON_IPI00008359.1; CON_IPI00290078.5; CON_00139301.3; CON_00009867.3	1	817.471	0.17	Low
	TRUE	Low	DVDAAYMNKVELQAK	2xDeamidated [N8; Q13]; 1xOxidation [M7]	6	7	1	CON_IPI00293665.9; CON_00300725.7; CON_00131368.3; CON_00347096.2; CON_00299145.9; CON_IPI00103481.3	1	1712.8	0.16	Low
	TRUE	Low	TLNNKFASFIDK	2xDeamidated [N3; N4]	24	25	2	CON_IPI00847342.1; CON_IPI00290857.2; CON_00622240.4; IPI:CON_105456; CON_IPI00005859.3; CON_IPI00293665.9; CON_00300725.7; CON_IPI00241841.9; CON_00131368.3; CON_00221797.1; CON_00124499.2; IPI:CON_00697851.1; CON_00299145.9; CON_00420312.4; IPI:CON_130456; CON_00021304.1; CON_IPI00017870.1; CON_00462140.1; CON_IPI00008359.1; CON_IPI00306959.10; CON_IPI00406377.3; CON_IPI00554648.3; CON_00139301…	1	1399.71	0.15	Low
	TRUE	Low	TLNNKFASFIDKVR	2xDeamidated [N3; N4]	23	24	1	CON_IPI00847342.1; CON_IPI00290857.2; CON_00622240.4; IPI:CON_105456; CON_IPI00005859.3; CON_IPI00293665.9; CON_00300725.7; CON_IPI00241841.9; CON_00131368.3; CON_00221797.1; CON_00124499.2; IPI:CON_00697851.1; CON_00299145.9; CON_00420312.4; IPI:CON_130456; CON_00021304.1; CON_00462140.1; CON_IPI00008359.1; CON_IPI00306959.10; CON_IPI00406377.3; CON_IPI00554648.3; CON_00139301.3; CON_00009867.3	2	1654.88	0.15	Low
	TRUE	Low	SGFSSVSVSRSR		1	1	1	CON_00300725.7	1	1255.64	0.15	Low
	TRUE	Low	GEMALKDAKNK	1xOxidation [M3]	3	4	1	CON_IPI00293665.9; CON_00300725.7; CON_00299145.9	2	1220.63	0.13	Low
	TRUE	Low	GRLDSELR		8	9	1	CON_IPI00293665.9; CON_00300725.7; CON_IPI00241841.9; CON_00131368.3; IPI:CON_00697851.1; CON_00299145.9; CON_00139301.3; CON_00009867.3	1	945.511	0.12	Low
	TRUE	Low	ISIGGGSCAISGGYGSR		3	4	1	CON_IPI00293665.9; CON_00300725.7; CON_00299145.9	0	1541.74	0.12	Low
	TRUE	Low	VLETKWTLLQEQGTK	1xDeamidated [Q]	1	1	2	CON_00300725.7	1	1774.96	0.11	Low
	TRUE	Low	AEAESWYQTKYEELQVTAGR	2xDeamidated [Q8; Q15]	5	6	1	CON_IPI00005859.3; CON_00300725.7; CON_00131368.3; CON_00221797.1; CON_00299145.9	1	2361.09	0.11	Low
	TRUE	Low	LDSELRGMQDLVEDFKNK		1	1	1	CON_00300725.7	2	2137.06	0.1	Low
	TRUE	Low	QDLARLLK		3	4	1	CON_IPI00293665.9; CON_00300725.7; CON_00299145.9	1	956.589	0.09	Low
	TRUE	Low	GMQDLVEDFKNKYEDEINK		1	1	1	CON_00300725.7	2	2315.09	0.09	Low
	TRUE	Low	QLDSIVGERGRLDSELR		3	4	1	CON_00300725.7; CON_00299145.9; CON_00009867.3	2	1943.03	0.08	Low
	TRUE	Low	QCANLQAAIADAEQR	2xDeamidated [Q1; N/Q]; 1xC29H38O4 [C2]	3	4	2	CON_IPI00293665.9; CON_00300725.7; CON_00131368.3	0	2054.01	0.08	Low
	TRUE	Low	YEDEINKR	1xDeamidated [N6]	20	21	1	CON_IPI00748057.2; CON_IPI00290857.2; CON_00622240.4; CON_IPI00376379.3; CON_IPI00005859.3; CON_IPI00293665.9; CON_00300725.7; IPI:CON_00714876.1; CON_00131368.3; CON_00221797.1; CON_00124499.2; IPI:CON_00697851.1; CON_00299145.9; CON_00021304.1; CON_00462140.1; CON_IPI00008359.1; CON_00220327.3; CON_IPI00554648.3; CON_00139301.3; CON_00009867.3	1	1067.5	0.08	Low
	TRUE	Low	LEGLEDALQKAKQDLAR	1xDeamidated [Q]	3	4	2	CON_IPI00293665.9; CON_00300725.7; CON_00299145.9	2	1899.02	0.04	Low
	TRUE	Low	NKYEDEINK	2xDeamidated [N1; N8]	14	15	1	CON_IPI00748057.2; CON_IPI00293665.9; CON_00300725.7; CON_IPI00241841.9; CON_00124499.2; IPI:CON_00697851.1; CON_00299145.9; CON_IPI00017870.1; CON_00462140.1; CON_00220327.3; CON_IPI00787323.2; CON_IPI00554648.3; CON_00139301.3; CON_00009867.3	1	1154.52	0.03	Low
TRUE	Master Protein	CON_00384444.5	Keratin, type I cytoskeletal 14	79.661	48	146	22	1	472	51.6	5.16	17.83	48
	Checked	Confidence	Sequence	Modifications	# Protein Groups	# Proteins	# PSMs	Master Protein Accessions	# Missed Cleavages	Theo. MH+ [Da]	XCorr Sequest HT	Confidence Sequest HT
	TRUE	High	VTMQNLNDRLASYLDKVR		4	4	3	CON_00009865.2; CON_00384444.5; CON_00225378.3; CON_00217963.3	2	2136.12	3.54	High
	TRUE	High	APSTYGGGLSVSSSR		1	1	1	CON_00384444.5	0	1425.7	2.8	High
	TRUE	High	LASYLDKVR		11	11	1	CON_00009865.2; CON_00384444.5; CON_00136056.1; CON_00225378.3; CON_IPI00015309.1; CON_00450768.7; CON_00112947.1; CON_IPI00479145.2; CON_IPI00290077.1; CON_00217963.3; CON_IPI00230365.5	1	1064.61	2.38	High
	TRUE	High	ALEEANADLEVK		6	6	1	CON_00009866.6; CON_IPI00468696.3; CON_00384444.5; CON_IPI00873598.1; CON_IPI00290077.1; CON_00217963.3	0	1301.66	2.32	High
	TRUE	Medium	TEELNREVATNSELVQSGKSEISELR		3	3	1	CON_00384444.5; CON_00450768.7; CON_IPI00230365.5	2	2918.47	2.04	Medium
	TRUE	Medium	VTMQNLNDRLASYLDKVR	1xOxidation [M3]	4	4	1	CON_00009865.2; CON_00384444.5; CON_00225378.3; CON_00217963.3	2	2152.12	1.96	Medium
	TRUE	Medium	VLDELTLAR		9	9	1	CON_IPI00468696.3; CON_00384444.5; CON_00225378.3; CON_00450768.7; CON_00112947.1; CON_IPI00479145.2; CON_IPI00290077.1; CON_00217963.3; CON_IPI00230365.5	0	1029.59	1.72	Medium
	TRUE	Medium	RTMQNLEIELQSQLSMKASLENSLEETK	1xDeamidated [N22]; 2xOxidation [M3; M16]	1	1	3	CON_00384444.5	2	3283.6	1.6	Medium
	TRUE	Medium	TIEDLRNKILTATVDNANVLLQIDNAR	2xDeamidated [N16; N18]	1	1	1	CON_00384444.5	2	3025.62	1.48	Medium
	TRUE	Medium	RTMQNLEIELQSQLSMKASLENSLEETK	2xOxidation [M3; M16]	1	1	1	CON_00384444.5	2	3282.62	1.22	Medium
	TRUE	Medium	TRLEQEIATYRR		9	10	1	CON_IPI00468696.3; CON_00384444.5; CON_00135197.5; CON_00131209.3; CON_00828528.1; CON_00450768.7; CON_00217963.3; CON_IPI00230365.5; CON_IPI00021298.1	2	1535.83	1.19	Medium
	TRUE	Medium	NKILTATVDNANVLLQIDNARLAADDFR	3xDeamidated [N12; Q16; N19]	1	1	4	CON_00384444.5	2	3087.6	1.03	Medium
	TRUE	Low	SEISELRRTMQNLEIELQSQLSMK		1	1	2	CON_00384444.5	2	2863.47	0.99	Low
	TRUE	Low	EVATNSELVQSGKSEISELR	2xDeamidated [N5; Q10]	3	3	2	CON_00384444.5; CON_00450768.7; CON_IPI00230365.5	1	2178.08	0.93	Low
	TRUE	Low	SEISELRRTMQNLEIELQSQLSMK	1xOxidation [M]	1	1	4	CON_00384444.5	2	2879.46	0.88	Low
	TRUE	Low	ILNEMRDQYEKMAEK	1xDeamidated [Q/N]; 1xOxidation [M12]	3	3	2	CON_IPI00468696.3; CON_00384444.5; CON_00450768.7	2	1914.89	0.79	Low
	TRUE	Low	ISSVLAGGSCRAPSTYGGGLSVSSSR		1	1	1	CON_00384444.5	1	2456.22	0.75	Low
	TRUE	Low	YCMQLAQIQEMIGSVEEQLAQLR	1xOxidation [M3]; 1xC29H38O4 [C2]	1	1	1	CON_00384444.5	0	3147.58	0.73	Low
	TRUE	Low	VMDVHDGKVVSTHEQVLR	1xDeamidated [Q15]	1	1	1	CON_00384444.5	1	2050.04	0.69	Low
	TRUE	Low	ILTATVDNANVLLQIDNARLAADDFR	2xDeamidated [N17; N/Q]	1	1	2	CON_00384444.5	1	2844.47	0.69	Low
	TRUE	Low	TMQNLEIELQSQLSMK	2xDeamidated [Q10; Q12]; 2xOxidation [M2; M15]	1	1	1	CON_00384444.5	0	1926.9	0.67	Low
	TRUE	Low	TIEDLRNK		3	3	3	CON_IPI00468696.3; CON_00384444.5; CON_00217963.3	1	988.542	0.64	Low
	TRUE	Low	TMQNLEIELQSQLSMK		1	1	2	CON_00384444.5	0	1892.95	0.63	Low
	TRUE	Low	RTMQNLEIELQSQLSMK	2xDeamidated [Q11; Q13]; 2xOxidation [M3; M16]	1	1	1	CON_00384444.5	1	2083	0.61	Low
	TRUE	Low	ILNEMRDQYEKMAEK		3	3	1	CON_IPI00468696.3; CON_00384444.5; CON_00450768.7	2	1897.91	0.6	Low
	TRUE	Low	SEISELRRTMQNLEIELQSQLSMK	1xDeamidated [N/Q]	1	1	2	CON_00384444.5	2	2864.45	0.59	Low
	TRUE	Low	YCMQLAQIQEMIGSVEEQLAQLR	3xDeamidated [Q4; Q7; Q9]; 1xC29H38O4 [C2]	1	1	1	CON_00384444.5	0	3134.54	0.58	Low
	TRUE	Low	VMDVHDGKVVSTHEQVLR		1	1	2	CON_00384444.5	1	2049.05	0.58	Low
	TRUE	Low	GRYCMQLAQIQEMIGSVEEQLAQLR	1xDeamidated [Q23]	1	1	1	CON_00384444.5	1	2895.42	0.57	Low
	TRUE	Low	VTMQNLNDRLASYLDKVR	1xDeamidated [Q/N]; 1xOxidation [M3]	4	4	6	CON_00009865.2; CON_00384444.5; CON_00225378.3; CON_00217963.3	2	2153.1	0.56	Low
	TRUE	Low	MTTCSRQFTSSSSMK	1xDeamidated [Q7]; 1xOxidation [M1]	2	2	1	CON_00384444.5; CON_00217963.3	1	1698.71	0.55	Low
	TRUE	Low	NRKDAEEWFFTK		2	2	2	CON_IPI00468696.3; CON_00384444.5	2	1570.76	0.55	Low
	TRUE	Low	QRPAEIKDYSPYFK		1	1	2	CON_00384444.5	1	1741.89	0.53	Low
	TRUE	Low	GRYCMQLAQIQEMIGSVEEQLAQLR	1xDeamidated [Q]; 1xC29H38O4 [C4]	1	1	3	CON_00384444.5	1	3345.69	0.53	Low
	TRUE	Low	LAADDFRTKYETELNLR	1xDeamidated [N15]	2	2	2	CON_IPI00468696.3; CON_00384444.5	2	2056.03	0.52	Low
	TRUE	Low	TMQNLEIELQSQLSMKASLENSLEETK	3xDeamidated [Q3; Q10; N21]; 1xOxidation [M15]	1	1	1	CON_00384444.5	1	3113.48	0.51	Low
	TRUE	Low	ILTATVDNANVLLQIDNAR		1	1	1	CON_00384444.5	0	2054.12	0.5	Low
	TRUE	Low	DWYQRQRPAEIK	1xDeamidated [Q]	1	1	2	CON_00384444.5	1	1590.8	0.5	Low
	TRUE	Low	YCMQLAQIQEMIGSVEEQLAQLR	1xDeamidated [Q]; 1xOxidation [M11]; 1xC29H38O4 [C2]	1	1	3	CON_00384444.5	0	3148.56	0.5	Low
	TRUE	Low	GRYCMQLAQIQEMIGSVEEQLAQLR	2xDeamidated [Q20; Q23]	1	1	1	CON_00384444.5	1	2896.4	0.49	Low
	TRUE	Low	KNHEEEMNALRGQVGGDVNVEMDAAPGVDLSR	2xDeamidated [N2; N8]	2	2	1	CON_IPI00468696.3; CON_00384444.5	2	3439.59	0.48	Low
	TRUE	Low	KNHEEEMNALR	1xDeamidated [N]; 1xOxidation [M7]	4	4	4	CON_IPI00468696.3; CON_00384444.5; CON_00450768.7; CON_IPI00230365.5	1	1387.63	0.48	Low
	TRUE	Low	ILTATVDNANVLLQIDNAR	2xDeamidated [N/Q]	1	1	8	CON_00384444.5	0	2056.09	0.48	Low
	TRUE	Low	MAEKNRK	1xDeamidated [N5]	4	4	1	CON_IPI00468696.3; CON_00384444.5; CON_00450768.7; CON_IPI00230365.5	2	877.456	0.45	Low
	TRUE	Low	IRDWYQRQRPAEIK		1	1	1	CON_00384444.5	2	1859	0.45	Low
	TRUE	Low	KNHEEEMNALR	1xDeamidated [N]	4	4	3	CON_IPI00468696.3; CON_00384444.5; CON_00450768.7; CON_IPI00230365.5	1	1371.63	0.44	Low
	TRUE	Low	SEISELRRTMQNLEIELQSQLSMK	3xDeamidated [Q11; N12; Q18]	1	1	1	CON_00384444.5	2	2866.42	0.44	Low
	TRUE	Low	TEELNREVATNSELVQSGKSEISELR	1xDeamidated [N/Q]	3	3	3	CON_00384444.5; CON_00450768.7; CON_IPI00230365.5	2	2919.45	0.43	Low
	TRUE	Low	VTMQNLNDRLASYLDK	1xDeamidated [N/Q]; 1xOxidation [M3]	4	4	3	CON_00009865.2; CON_00384444.5; CON_00225378.3; CON_00217963.3	1	1897.93	0.42	Low
	TRUE	Low	YCMQLAQIQEMIGSVEEQLAQLR	1xC29H38O4 [C2]	1	1	1	CON_00384444.5	0	3131.59	0.41	Low
	TRUE	Low	TMQNLEIELQSQLSMK	1xDeamidated [N/Q]; 1xOxidation [M15]	1	1	4	CON_00384444.5	0	1909.92	0.41	Low
	TRUE	Low	TKVMDVHDGK	1xOxidation [M4]	1	1	2	CON_00384444.5	1	1145.56	0.39	Low
	TRUE	Low	GSCGIGGGIGGGSSRISSVLAGGSCR	1xC29H38O4 [C25]	2	2	1	CON_00384444.5; CON_00217963.3	1	2702.36	0.38	Low
	TRUE	Low	ADLEMQIESLKEELAYLKK	1xDeamidated [Q6]	1	1	1	CON_00384444.5	2	2252.17	0.37	Low
	TRUE	Low	KNHEEEMNALR	2xDeamidated [N2; N8]	4	4	1	CON_IPI00468696.3; CON_00384444.5; CON_00450768.7; CON_IPI00230365.5	1	1372.62	0.36	Low
	TRUE	Low	GRYCMQLAQIQEMIGSVEEQLAQLR	3xDeamidated [Q6; Q9; Q11]; 1xC29H38O4 [C4]	1	1	1	CON_00384444.5	1	3347.66	0.35	Low
	TRUE	Low	ILNEMRDQYEKMAEK	1xDeamidated [N3]; 2xOxidation [M5; M12]	3	3	1	CON_IPI00468696.3; CON_00384444.5; CON_00450768.7	2	1930.89	0.34	Low
	TRUE	Low	ILTATVDNANVLLQIDNAR	3xDeamidated [N10; Q14; N17]	1	1	1	CON_00384444.5	0	2057.08	0.32	Low
	TRUE	Low	ILNEMRDQYEKMAEK	2xDeamidated [N3; Q8]; 2xOxidation [M5; M12]	3	3	1	CON_IPI00468696.3; CON_00384444.5; CON_00450768.7	2	1931.87	0.32	Low
	TRUE	Low	TKVMDVHDGKVVSTHEQVLR		1	1	1	CON_00384444.5	2	2278.2	0.32	Low
	TRUE	Low	YCMQLAQIQEMIGSVEEQLAQLR	2xOxidation [M3; M11]	1	1	1	CON_00384444.5	0	2713.3	0.31	Low
	TRUE	Low	EELAYLKKNHEEEMNALR	1xOxidation [M14]	3	3	1	CON_00384444.5; CON_00450768.7; CON_IPI00230365.5	2	2233.09	0.29	Low
	TRUE	Low	KNHEEEMNALRGQVGGDVNVEMDAAPGVDLSR	1xDeamidated [N2]; 1xOxidation [M]	2	2	2	CON_IPI00468696.3; CON_00384444.5	2	3454.6	0.27	Low
	TRUE	Low	ILTATVDNANVLLQIDNARLAADDFR		1	1	1	CON_00384444.5	1	2842.51	0.26	Low
	TRUE	Low	KDAEEWFFTKTEELNR		2	2	1	CON_IPI00468696.3; CON_00384444.5	2	2042.98	0.25	Low
	TRUE	Low	NRKDAEEWFFTK	1xDeamidated [N1]	2	2	3	CON_IPI00468696.3; CON_00384444.5	2	1571.75	0.25	Low
	TRUE	Low	SEISELRRTMQNLEIELQSQLSMK	1xDeamidated [Q11]; 1xOxidation [M23]	1	1	1	CON_00384444.5	2	2880.44	0.24	Low
	TRUE	Low	KNHEEEMNALRGQVGGDVNVEMDAAPGVDLSR		2	2	1	CON_IPI00468696.3; CON_00384444.5	2	3437.62	0.23	Low
	TRUE	Low	GRYCMQLAQIQEMIGSVEEQLAQLR	2xOxidation [M5; M13]; 1xC29H38O4 [C4]	1	1	1	CON_00384444.5	1	3376.7	0.22	Low
	TRUE	Low	LASYLDK		13	13	1	CON_00009865.2; CON_00384444.5; CON_00136056.1; CON_IPI00311493.5; CON_00225378.3; CON_IPI00015309.1; CON_00450768.7; CON_00019359.3; CON_00112947.1; CON_IPI00479145.2; CON_IPI00290077.1; CON_00217963.3; CON_IPI00230365.5	0	809.44	0.2	Low
	TRUE	Low	DQYEKMAEKNR	1xDeamidated [N10]	4	4	1	CON_IPI00468696.3; CON_00384444.5; CON_00450768.7; CON_IPI00230365.5	2	1412.65	0.2	Low
	TRUE	Low	MTTCSRQFTSSSSMK	2xOxidation [M1; M14]	2	2	1	CON_00384444.5; CON_00217963.3	1	1713.72	0.19	Low
	TRUE	Low	ALEEANADLEVK	1xDeamidated [N6]	6	6	1	CON_00009866.6; CON_IPI00468696.3; CON_00384444.5; CON_IPI00873598.1; CON_IPI00290077.1; CON_00217963.3	0	1302.64	0.19	Low
	TRUE	Low	MTTCSRQFTSSSSMK	1xDeamidated [Q7]; 1xOxidation [M14]; 1xAcetyl [N-Term]	2	2	1	CON_00384444.5; CON_00217963.3	1	1740.72	0.18	Low
	TRUE	Low	TMQNLEIELQSQLSMKASLENSLEETK	2xDeamidated [N21; Q/N]; 2xOxidation [M2; M15]	1	1	2	CON_00384444.5	1	3128.49	0.18	Low
	TRUE	Low	QRPAEIK		1	1	1	CON_00384444.5	0	841.489	0.17	Low
	TRUE	Low	TEELNREVATNSELVQSGK		3	3	1	CON_00384444.5; CON_00450768.7; CON_IPI00230365.5	1	2104.05	0.16	Low
	TRUE	Low	ILLDVKTRLEQEIATYR	1xDeamidated [Q11]	4	4	1	CON_00384444.5; CON_00828528.1; CON_00450768.7; CON_IPI00230365.5	2	2062.15	0.16	Low
	TRUE	Low	QFTSSSSMKGSCGIGGGIGGGSSR	1xDeamidated [Q1]; 1xC29H38O4 [C12]	2	2	1	CON_00384444.5; CON_00217963.3	1	2656.26	0.16	Low
	TRUE	Low	DVTSSSRQIR		1	1	1	CON_00384444.5	1	1148.6	0.15	Low
	TRUE	Low	MTTCSRQFTSSSSMK	1xDeamidated [Q7]	2	2	1	CON_00384444.5; CON_00217963.3	1	1682.72	0.14	Low
	TRUE	Low	MTTCSRQFTSSSSMK	1xDeamidated [Q7]; 1xAcetyl [N-Term]	2	2	1	CON_00384444.5; CON_00217963.3	1	1724.73	0.12	Low
	TRUE	Low	TKYETELNLRMSVEADINGLR		2	2	1	CON_IPI00468696.3; CON_00384444.5	2	2452.25	0.11	Low
	TRUE	Low	QRPAEIKDYSPYFK	1xDeamidated [Q1]	1	1	1	CON_00384444.5	1	1742.87	0.1	Low
	TRUE	Low	YCMQLAQIQEMIGSVEEQLAQLR	2xOxidation [M3; M11]; 1xC29H38O4 [C2]	1	1	1	CON_00384444.5	0	3163.58	0.08	Low
	TRUE	Low	MSVEADINGLRR	1xOxidation [M1]	4	4	1	CON_IPI00468696.3; CON_00384444.5; CON_IPI00479145.2; CON_IPI00230365.5	1	1376.7	0.07	Low
	TRUE	Low	NKILTATVDNANVLLQIDNARLAADDFR	1xDeamidated [N/Q]	1	1	4	CON_00384444.5	2	3085.63	0.04	Low
TRUE	Master Protein	CON_00798492.2	Isoform 1 of Keratin, type I cytoskeletal 10	63.6842	51	144	42	1	570	57.7	5.11	16.4	51
	Checked	Confidence	Sequence	Modifications	# Protein Groups	# Proteins	# PSMs	Master Protein Accessions	# Missed Cleavages	Theo. MH+ [Da]	XCorr Sequest HT	Confidence Sequest HT
	TRUE	High	QSVEADINGLRR	1xDeamidated [N8]	5	5	3	CON_00009866.6; CON_00009865.2; CON_00136056.1; CON_IPI00873598.1; CON_00798492.2	1	1358.7	3.48	High
	TRUE	High	QSVEADINGLRR		5	5	3	CON_00009866.6; CON_00009865.2; CON_00136056.1; CON_IPI00873598.1; CON_00798492.2	1	1357.72	2.62	High
	TRUE	High	ALEESNYELEGK		2	2	6	CON_00009865.2; CON_00798492.2	0	1381.65	2.56	High
	TRUE	Medium	ALEESNYELEGKIKEWYEK		2	2	1	CON_00009865.2; CON_00798492.2	2	2358.15	1.84	Medium
	TRUE	Medium	IKEWYEK		2	2	1	CON_00009865.2; CON_00798492.2	1	995.52	1.8	Medium
	TRUE	Medium	SEITELRR		2	2	1	CON_00009865.2; CON_00798492.2	1	1003.55	1.74	Medium
	TRUE	Medium	KNHEEEMRDLQNVSTGDVNVEMNAAPGVDLTQLLNNMR	1xDeamidated [N36]	1	1	1	CON_00798492.2	2	4283.01	1.22	Medium
	TRUE	Low	TIEDLKGQILTLTTDNANVLLQIDNARLAADDFR	2xDeamidated [N/Q]	1	1	3	CON_00798492.2	2	3772.96	1.08	Low
	TRUE	Low	TIEDLKGQILTLTTDNANVLLQIDNARLAADDFR	1xDeamidated [Q8]	1	1	1	CON_00798492.2	2	3771.98	0.95	Low
	TRUE	Low	DLQNVSTGDVNVEMNAAPGVDLTQLLNNMRNQYEQLAEK	1xOxidation [M29]	1	1	1	CON_00798492.2	1	4348.08	0.93	Low
	TRUE	Low	DLQNVSTGDVNVEMNAAPGVDLTQLLNNMRNQYEQLAEK	2xDeamidated [Q3; N31]	1	1	1	CON_00798492.2	1	4334.06	0.91	Low
	TRUE	Low	ALEESNYELEGK	1xDeamidated [N6]	2	2	1	CON_00009865.2; CON_00798492.2	0	1382.63	0.82	Low
	TRUE	Low	SGGGGGGGSVRVSSTR		1	1	4	CON_00798492.2	1	1377.68	0.71	Low
	TRUE	Low	DLQNVSTGDVNVEMNAAPGVDLTQLLNNMRNQYEQLAEK		1	1	2	CON_00798492.2	1	4332.09	0.7	Low
	TRUE	Low	VLDELTLSKSDLEMQIESLNEELAYLKK	1xDeamidated [N/Q]	1	1	2	CON_00798492.2	2	3252.68	0.7	Low
	TRUE	Low	NQYEQLAEKNRK	2xDeamidated [N10; Q/N]	1	1	2	CON_00798492.2	2	1522.75	0.61	Low
	TRUE	Low	YYKTIEDLKGQILTLTTDNANVLLQIDNAR	2xDeamidated [N/Q]	1	1	4	CON_00798492.2	2	3438.8	0.6	Low
	TRUE	Low	DLQNVSTGDVNVEMNAAPGVDLTQLLNNMR	1xDeamidated [N]; 1xOxidation [M29]	1	1	3	CON_00798492.2	0	3245.54	0.58	Low
	TRUE	Low	LENEIQTYRSLLEGEGSSSGGGGGRR	2xDeamidated [N3; Q6]	1	1	1	CON_00798492.2	2	2711.29	0.54	Low
	TRUE	Low	AETECQNAEYQQLLDIKTR		1	1	1	CON_00798492.2	1	2253.08	0.54	Low
	TRUE	Low	AETECQNAEYQQLLDIK	3xDeamidated [Q6; Q11; Q/N]	1	1	2	CON_00798492.2	0	1998.88	0.52	Low
	TRUE	Low	GQILTLTTDNANVLLQIDNAR	3xDeamidated [Q2; N19; N/Q]	1	1	2	CON_00798492.2	0	2286.18	0.51	Low
	TRUE	Low	VTMQNLNDRLASYMDK	2xOxidation [M3; M14]	1	1	2	CON_00798492.2	1	1930.9	0.51	Low
	TRUE	Low	KNHEEEMRDLQNVSTGDVNVEMNAAPGVDLTQLLNNMR	1xOxidation [M]	1	1	5	CON_00798492.2	2	4298.02	0.5	Low
	TRUE	Low	RTVQGLEIELQSQLALK	1xDeamidated [Q]	1	1	2	CON_00798492.2	1	1927.09	0.49	Low
	TRUE	Low	HGNSSQREPRDYSK		1	1	2	CON_00798492.2	2	1660.78	0.49	Low
	TRUE	Low	YENEVTLRQSVEADINGLR		1	1	1	CON_00798492.2	1	2206.11	0.48	Low
	TRUE	Low	LENEIQTYRSLLEGEGSSSGGGGGR		1	1	2	CON_00798492.2	1	2553.22	0.46	Low
	TRUE	Low	EWYEKHGNSSQR	1xDeamidated [N/Q]	1	1	3	CON_00798492.2	1	1521.67	0.46	Low
	TRUE	Low	DAEEWFNQKSK		1	1	2	CON_00798492.2	1	1381.64	0.45	Low
	TRUE	Low	VLDELTLSKSDLEMQIESLNEELAYLKK	2xDeamidated [Q15; N20]	1	1	1	CON_00798492.2	2	3253.66	0.45	Low
	TRUE	Low	TRLENEIQTYRSLLEGEGSSSGGGGGR	2xDeamidated [N5; Q8]	1	1	1	CON_00798492.2	2	2812.33	0.44	Low
	TRUE	Low	KNHEEEMRDLQNVSTGDVNVEMNAAPGVDLTQLLNNMR	1xDeamidated [N/Q]; 1xOxidation [M7]	1	1	4	CON_00798492.2	2	4299.01	0.43	Low
	TRUE	Low	LENEIQTYRSLLEGEGSSSGGGGGR	1xDeamidated [N/Q]	1	1	3	CON_00798492.2	1	2554.2	0.42	Low
	TRUE	Low	VLDELTLSKSDLEMQIESLNEELAYLK	2xDeamidated [Q15; N20]; 1xOxidation [M14]	1	1	1	CON_00798492.2	1	3141.56	0.42	Low
	TRUE	Low	SLLEGEGSSSGGGGGRR		1	1	1	CON_00798492.2	1	1562.75	0.42	Low
	TRUE	Low	LENEIQTYRSLLEGEGSSSGGGGGR	2xDeamidated [N3; Q6]	1	1	1	CON_00798492.2	1	2555.19	0.4	Low
	TRUE	Low	DLQNVSTGDVNVEMNAAPGVDLTQLLNNMR	3xDeamidated [N11; N15; N27]; 1xOxidation [M29]	1	1	1	CON_00798492.2	0	3247.51	0.37	Low
	TRUE	Low	GQILTLTTDNANVLLQIDNAR	2xDeamidated [Q/N]	1	1	6	CON_00798492.2	0	2285.2	0.35	Low
	TRUE	Low	SSGGGDQSSKGPR		1	1	1	CON_00798492.2	1	1219.57	0.33	Low
	TRUE	Low	DLQNVSTGDVNVEMNAAPGVDLTQLLNNMR	2xDeamidated [N15; N27]; 1xOxidation [M29]	1	1	1	CON_00798492.2	0	3246.53	0.33	Low
	TRUE	Low	NQYEQLAEKNR		1	1	1	CON_00798492.2	1	1392.69	0.32	Low
	TRUE	Low	TVQGLEIELQSQLALK		1	1	1	CON_00798492.2	0	1770	0.3	Low
	TRUE	Low	MSVLYSSSSK		1	1	6	CON_00798492.2	0	1088.53	0.29	Low
	TRUE	Low	VTMQNLNDRLASYMDK	1xDeamidated [N/Q]; 2xOxidation [M3; M14]	1	1	6	CON_00798492.2	1	1931.88	0.29	Low
	TRUE	Low	LASYMDKVR		1	1	1	CON_00798492.2	1	1082.57	0.28	Low
	TRUE	Low	VRALEESNYELEGKIK	1xDeamidated [N8]	2	2	1	CON_00009865.2; CON_00798492.2	2	1878.98	0.28	Low
	TRUE	Low	SKELTTEIDSNIEQMSSHK		1	1	2	CON_00798492.2	1	2177.04	0.28	Low
	TRUE	Low	VTMQNLNDRLASYMDKVR	1xDeamidated [Q/N]; 1xOxidation [M]	1	1	6	CON_00798492.2	2	2171.06	0.27	Low
	TRUE	Low	LASYMDKVR	1xOxidation [M5]	1	1	1	CON_00798492.2	1	1098.56	0.24	Low
	TRUE	Low	NRKDAEEWFNQK	1xDeamidated [Q/N]	1	1	3	CON_00798492.2	2	1565.73	0.24	Low
	TRUE	Low	NQYEQLAEKNRK	3xDeamidated [Q2; N10; N/Q]	1	1	4	CON_00798492.2	2	1523.73	0.22	Low
	TRUE	Low	MSVLYSSSSKQFSSSR	1xDeamidated [Q11]; 1xAcetyl [N-Term]	1	1	1	CON_00798492.2	1	1823.85	0.2	Low
	TRUE	Low	DLQNVSTGDVNVEMNAAPGVDLTQLLNNMRNQYEQLAEKNR	1xOxidation [M14]	1	1	1	CON_00798492.2	2	4618.23	0.19	Low
	TRUE	Low	AETECQNAEYQQLLDIKTRLENEIQTYR	1xC29H38O4 [C5]	1	1	1	CON_00798492.2	2	3849.92	0.16	Low
	TRUE	Low	SKELTTEIDSNIEQMSSHKSEITELR	2xDeamidated [N11; Q14]; 1xOxidation [M15]	1	1	1	CON_00798492.2	2	3023.44	0.16	Low
	TRUE	Low	GQILTLTTDNANVLLQIDNARLAADDFR		1	1	1	CON_00798492.2	1	3071.61	0.16	Low
	TRUE	Low	KDAEEWFNQKSK	1xDeamidated [N/Q]	1	1	2	CON_00798492.2	2	1510.72	0.15	Low
	TRUE	Low	LENEIQTYR		2	2	1	CON_00009865.2; CON_00798492.2	0	1165.58	0.12	Low
	TRUE	Low	ALEESNYELEGKIK		2	2	1	CON_00009865.2; CON_00798492.2	1	1622.83	0.12	Low
	TRUE	Low	QSVEADINGLR	1xDeamidated [N/Q]	6	6	2	CON_00009866.6; CON_00009865.2; CON_IPI00004550.5; CON_00136056.1; CON_IPI00873598.1; CON_00798492.2	0	1202.6	0.12	Low
	TRUE	Low	RVLDELTLSKSDLEMQIESLNEELAYLK	1xDeamidated [Q/N]; 1xOxidation [M15]	1	1	2	CON_00798492.2	2	3296.68	0.11	Low
	TRUE	Low	SDLEMQIESLNEELAYLKKNHEEEMR	2xDeamidated [N11; N20]; 2xOxidation [M5; M25]	1	1	1	CON_00798492.2	2	3212.46	0.1	Low
	TRUE	Low	NQYEQLAEKNRK		1	1	1	CON_00798492.2	2	1520.78	0.09	Low
	TRUE	Low	NQYEQLAEK	2xDeamidated [N1; Q2]	1	1	1	CON_00798492.2	0	1124.51	0.06	Low
	TRUE	Low	VTMQNLNDRLASYMDK	2xDeamidated [N7; Q/N]; 2xOxidation [M3; M14]	1	1	2	CON_00798492.2	1	1932.87	0.05	Low
	TRUE	Low	MSVLYSSSSKQFSSSRSGGGGGGGSVR	1xDeamidated [Q11]	1	1	1	CON_00798492.2	2	2610.22	0.05	Low
	TRUE	Low	SKELTTEIDSNIEQMSSHK	1xDeamidated [Q/N]; 1xOxidation [M15]	1	1	2	CON_00798492.2	1	2194.02	0.04	Low
	TRUE	Low	QSLEASLAETEGRYCVQLSQIQSQISALEEQLQQIR	2xDeamidated [Q]; 1xC29H38O4 [C15]	1	1	4	CON_00798492.2	1	4529.3	0.03	Low
	TRUE	Low	NHEEEMR	1xDeamidated [N1]	1	1	1	CON_00798492.2	0	945.373	0.01	Low
TRUE	Master Protein	CON_IPI00554648.3	Keratin, type II cytoskeletal 8	85.5072	69	208	32	1	483	53.7	5.59	15.04	69
	Checked	Confidence	Sequence	Modifications	# Protein Groups	# Proteins	# PSMs	Master Protein Accessions	# Missed Cleavages	Theo. MH+ [Da]	XCorr Sequest HT	Confidence Sequest HT
	TRUE	High	TLNNKFASFIDKVR		23	24	3	CON_IPI00847342.1; CON_IPI00290857.2; CON_00622240.4; IPI:CON_105456; CON_IPI00005859.3; CON_IPI00293665.9; CON_00300725.7; CON_IPI00241841.9; CON_00131368.3; CON_00221797.1; CON_00124499.2; IPI:CON_00697851.1; CON_00299145.9; CON_00420312.4; IPI:CON_130456; CON_00021304.1; CON_00462140.1; CON_IPI00008359.1; CON_IPI00306959.10; CON_IPI00406377.3; CON_IPI00554648.3; CON_00139301.3; CON_00009867.3	2	1652.91	4.51	High
	TRUE	High	NKYEDEINKR		11	12	5	CON_IPI00748057.2; CON_IPI00293665.9; CON_00300725.7; CON_00124499.2; IPI:CON_00697851.1; CON_00299145.9; CON_00462140.1; CON_00220327.3; CON_IPI00554648.3; CON_00139301.3; CON_00009867.3	2	1308.65	2.8	High
	TRUE	High	FASFIDKVR		31	32	1	CON_IPI00847342.1; CON_IPI00329306.3; CON_IPI00290857.2; CON_00622240.4; CON_IPI00174775.2; CON_00468956.4; IPI:CON_105456; CON_00347110.2; CON_IPI00376379.3; CON_IPI00005859.3; CON_IPI00293665.9; CON_00300725.7; CON_IPI00241841.9; CON_00131368.3; CON_00347096.2; CON_00221797.1; CON_00124499.2; IPI:CON_00697851.1; CON_00299145.9; CON_00420312.4; IPI:CON_130456; CON_00021304.1; CON_00462140.1; CON…	1	1082.6	2.64	High
	TRUE	Medium	FLEQQNK		28	29	2	IPI:CON_104456; CON_IPI00847342.1; CON_IPI00290857.2; IPI:CON_105456; CON_00124800.2; CON_IPI00005859.3; CON_IPI00293665.9; CON_00300725.7; CON_IPI00241841.9; CON_00131368.3; IPI:CON_106456; CON_00221797.1; CON_00124499.2; IPI:CON_00697851.1; CON_00299145.9; CON_00420312.4; IPI:CON_130456; CON_IPI00008359.1; IPI:CON_107456; CON_IPI00787323.2; CON_IPI00306959.10; CON_00166205.2; CON_IPI00406377.3;…	0	906.468	1.56	Medium
	TRUE	Medium	KDVDEAYMNKVELESR		2	2	10	CON_IPI00787323.2; CON_IPI00554648.3	2	1925.93	1.09	Medium
	TRUE	Medium	KDVDEAYMNKVELESR	1xDeamidated [N9]	2	2	6	CON_IPI00787323.2; CON_IPI00554648.3	2	1926.91	1.08	Medium
	TRUE	Medium	VSTSGPR		1	1	2	CON_IPI00554648.3	0	703.373	0.83	Medium
	TRUE	Low	VELESRLEGLTDEINFLRQLYEEEIR	1xDeamidated [Q19]	1	1	1	CON_IPI00554648.3	2	3194.62	0.97	Low
	TRUE	Low	GELAIKDANAKLSELEAALQR	1xDeamidated [N/Q]	3	3	3	CON_IPI00215804.4; CON_IPI00787323.2; CON_IPI00554648.3	2	2241.21	0.89	Low
	TRUE	Low	FLEQQNKMLETKWSLLQQQK	1xDeamidated [Q]	2	2	2	CON_IPI00787323.2; CON_IPI00554648.3	2	2521.31	0.88	Low
	TRUE	Low	DANAKLSELEAALQR		4	4	1	CON_IPI00215804.4; CON_IPI00017870.1; CON_IPI00787323.2; CON_IPI00554648.3	1	1628.86	0.79	Low
	TRUE	Low	MLETKWSLLQQQKTAR	3xDeamidated [Q10; Q11; Q12]; 1xOxidation [M1]	1	1	1	CON_IPI00554648.3	2	1980.01	0.78	Low
	TRUE	Low	LKLEAELGNMQGLVEDFKNK	2xDeamidated [Q11; N19]; 1xOxidation [M10]	1	1	1	CON_IPI00554648.3	2	2294.16	0.76	Low
	TRUE	Low	MLETKWSLLQQQKTAR	3xDeamidated [Q10; Q11; Q12]	1	1	2	CON_IPI00554648.3	2	1964.02	0.75	Low
	TRUE	Low	ASLEAAIADAEQR		2	2	3	CON_IPI00787323.2; CON_IPI00554648.3	0	1344.68	0.74	Low
	TRUE	Low	RQLETLGQEKLK	1xDeamidated [Q]	3	3	2	CON_IPI00017870.1; CON_IPI00787323.2; CON_IPI00554648.3	2	1443.82	0.71	Low
	TRUE	Low	FLEQQNKMLETK		3	3	7	CON_IPI00787323.2; CON_IPI00406377.3; CON_IPI00554648.3	1	1508.78	0.67	Low
	TRUE	Low	ASLEAAIADAEQRGELAIKDANAK	2xDeamidated [Q12; N22]	2	2	1	CON_IPI00787323.2; CON_IPI00554648.3	2	2457.25	0.63	Low
	TRUE	Low	FLEQQNKMLETK	1xDeamidated [Q/N]	3	3	3	CON_IPI00787323.2; CON_IPI00406377.3; CON_IPI00554648.3	1	1509.76	0.61	Low
	TRUE	Low	VRFLEQQNK	2xDeamidated [Q6; N8]	28	29	2	IPI:CON_104456; CON_IPI00847342.1; CON_IPI00290857.2; IPI:CON_105456; CON_00124800.2; CON_IPI00005859.3; CON_IPI00293665.9; CON_00300725.7; CON_IPI00241841.9; CON_00131368.3; IPI:CON_106456; CON_00221797.1; CON_00124499.2; IPI:CON_00697851.1; CON_00299145.9; CON_00420312.4; IPI:CON_130456; CON_IPI00008359.1; IPI:CON_107456; CON_IPI00787323.2; CON_IPI00306959.10; CON_00166205.2; CON_IPI00406377.3;…	1	1163.61	0.59	Low
	TRUE	Low	QLYEEEIRELQSQISDTSVVLSMDNSR	2xDeamidated [Q11; Q]; 1xOxidation [M23]	1	1	2	CON_IPI00554648.3	1	3187.49	0.59	Low
	TRUE	Low	VELESRLEGLTDEINFLR		2	2	1	CON_IPI00787323.2; CON_IPI00554648.3	1	2133.12	0.58	Low
	TRUE	Low	LEAELGNMQGLVEDFKNKYEDEINK		1	1	1	CON_IPI00554648.3	2	2926.41	0.56	Low
	TRUE	Low	MLETKWSLLQQQKTAR	2xDeamidated [Q11; Q12]; 1xOxidation [M1]	1	1	2	CON_IPI00554648.3	2	1979.03	0.56	Low
	TRUE	Low	SRAEAESMYQIK	1xDeamidated [Q10]	1	1	1	CON_IPI00554648.3	1	1413.67	0.56	Low
	TRUE	Low	LSELEAALQRAKQDMAR	1xDeamidated [Q9]; 1xOxidation [M15]	2	2	1	CON_IPI00787323.2; CON_IPI00554648.3	2	1947	0.55	Low
	TRUE	Low	KLLEGEESRLESGMQNMSIHTK		1	1	2	CON_IPI00554648.3	2	2517.24	0.54	Low
	TRUE	Low	LEGLTDEINFLRQLYEEEIR	2xDeamidated [N9; Q13]	1	1	1	CON_IPI00554648.3	1	2482.23	0.51	Low
	TRUE	Low	SNMDNMFESYINNLRR	2xDeamidated [N12; N13]; 1xOxidation [M]	2	2	3	CON_IPI00787323.2; CON_IPI00554648.3	1	2021.87	0.5	Low
	TRUE	Low	GELAIKDANAK		3	3	1	CON_IPI00215804.4; CON_IPI00787323.2; CON_IPI00554648.3	1	1129.62	0.5	Low
	TRUE	Low	TKTEISEMNRNISR	1xDeamidated [N11]; 1xOxidation [M8]	1	1	1	CON_IPI00554648.3	2	1695.83	0.49	Low
	TRUE	Low	VRFLEQQNKMLETK	2xDeamidated [Q6; N/Q]	3	3	2	CON_IPI00787323.2; CON_IPI00406377.3; CON_IPI00554648.3	2	1765.92	0.49	Low
	TRUE	Low	TLNNKFASFIDK	1xDeamidated [N]	24	25	7	CON_IPI00847342.1; CON_IPI00290857.2; CON_00622240.4; IPI:CON_105456; CON_IPI00005859.3; CON_IPI00293665.9; CON_00300725.7; CON_IPI00241841.9; CON_00131368.3; CON_00221797.1; CON_00124499.2; IPI:CON_00697851.1; CON_00299145.9; CON_00420312.4; IPI:CON_130456; CON_00021304.1; CON_IPI00017870.1; CON_00462140.1; CON_IPI00008359.1; CON_IPI00306959.10; CON_IPI00406377.3; CON_IPI00554648.3; CON_00139301…	1	1398.73	0.48	Low
	TRUE	Low	LSELEAALQRAKQDMAR	1xDeamidated [Q9]	2	2	2	CON_IPI00787323.2; CON_IPI00554648.3	2	1931	0.48	Low
	TRUE	Low	SRAEAESMYQIK		1	1	3	CON_IPI00554648.3	1	1412.68	0.47	Low
	TRUE	Low	SLDMDSIIAEVKAQYEDIANR	1xDeamidated [Q14]; 1xOxidation [M4]	1	1	1	CON_IPI00554648.3	1	2398.14	0.47	Low
	TRUE	Low	MLETKWSLLQQQKTAR	1xDeamidated [Q]; 1xOxidation [M1]	1	1	4	CON_IPI00554648.3	2	1978.04	0.47	Low
	TRUE	Low	QLREYQELMNVK	2xDeamidated [Q1; Q6]	2	2	1	CON_IPI00787323.2; CON_IPI00554648.3	1	1552.77	0.45	Low
	TRUE	Low	TARSNMDNMFESYINNLRR	1xDeamidated [N]; 2xOxidation [M6; M9]	1	1	2	CON_IPI00554648.3	2	2365.07	0.44	Low
	TRUE	Low	ASLEAAIADAEQR	1xDeamidated [Q12]	2	2	1	CON_IPI00787323.2; CON_IPI00554648.3	0	1345.66	0.43	Low
	TRUE	Low	WSLLQQQKTAR	1xDeamidated [Q7]	1	1	1	CON_IPI00554648.3	1	1359.74	0.4	Low
	TRUE	Low	SLDMDSIIAEVKAQYEDIANR		1	1	1	CON_IPI00554648.3	1	2381.17	0.39	Low
	TRUE	Low	LQAEIEGLKGQRASLEAAIADAEQR	1xDeamidated [Q24]	1	1	1	CON_IPI00554648.3	2	2668.39	0.39	Low
	TRUE	Low	SLDMDSIIAEVK	1xOxidation [M4]	2	2	1	CON_IPI00787323.2; CON_IPI00554648.3	0	1336.67	0.39	Low
	TRUE	Low	TKTEISEMNRNISR	1xDeamidated [N]	1	1	8	CON_IPI00554648.3	2	1679.84	0.38	Low
	TRUE	Low	QLREYQELMNVK	1xDeamidated [Q1]; 1xOxidation [M9]	2	2	1	CON_IPI00787323.2; CON_IPI00554648.3	1	1567.78	0.38	Low
	TRUE	Low	MLETKWSLLQQQK	1xOxidation [M1]	2	2	1	CON_IPI00787323.2; CON_IPI00554648.3	1	1648.87	0.38	Low
	TRUE	Low	WSLLQQQKTARSNMDNMFESYINNLR	3xDeamidated [N23; N24; N/Q]	1	1	2	CON_IPI00554648.3	2	3190.49	0.37	Low
	TRUE	Low	DANAKLSELEAALQR	1xDeamidated [Q/N]	4	4	3	CON_IPI00215804.4; CON_IPI00017870.1; CON_IPI00787323.2; CON_IPI00554648.3	1	1629.84	0.37	Low
	TRUE	Low	LESGMQNMSIHTK	2xOxidation [M5; M8]	2	2	1	CON_IPI00215804.4; CON_IPI00554648.3	0	1507.69	0.37	Low
	TRUE	Low	YEELQSLAGKHGDDLR	1xDeamidated [Q5]	1	1	1	CON_IPI00554648.3	1	1831.88	0.37	Low
	TRUE	Low	SRAEAESMYQIK	1xOxidation [M8]	1	1	1	CON_IPI00554648.3	1	1428.68	0.36	Low
	TRUE	Low	SYKVSTSGPRAFSSR		1	1	1	CON_IPI00554648.3	2	1629.83	0.34	Low
	TRUE	Low	AFSSRSYTSGPGSR		1	1	1	CON_IPI00554648.3	1	1459.69	0.34	Low
	TRUE	Low	KDVDEAYMNK	1xOxidation [M8]	3	3	1	CON_IPI00017870.1; CON_IPI00787323.2; CON_IPI00554648.3	1	1228.55	0.32	Low
	TRUE	Low	LESGMQNMSIHTK	1xDeamidated [N/Q]	2	2	2	CON_IPI00215804.4; CON_IPI00554648.3	0	1476.68	0.32	Low
	TRUE	Low	LKLEAELGNMQGLVEDFKNK	1xDeamidated [N19]; 1xOxidation [M10]	1	1	1	CON_IPI00554648.3	2	2293.17	0.31	Low
	TRUE	Low	RTKTEISEMNR	1xDeamidated [N10]	1	1	1	CON_IPI00554648.3	2	1365.68	0.31	Low
	TRUE	Low	FLEQQNKMLETK	2xDeamidated [Q4; Q/N]	3	3	6	CON_IPI00787323.2; CON_IPI00406377.3; CON_IPI00554648.3	1	1510.75	0.31	Low
	TRUE	Low	WSLLQQQKTAR	2xDeamidated [Q6; Q]	1	1	2	CON_IPI00554648.3	1	1360.72	0.31	Low
	TRUE	Low	QDMARQLR	1xDeamidated [Q6]	7	7	1	CON_IPI00847342.1; IPI:CON_105456; CON_IPI00853265.1; CON_IPI00787323.2; CON_IPI00306959.10; CON_00660358.2; CON_IPI00554648.3	1	1018.51	0.31	Low
	TRUE	Low	VTQKSYKVSTSGPR	1xDeamidated [Q3]	1	1	2	CON_IPI00554648.3	2	1538.82	0.3	Low
	TRUE	Low	LEGLTDEINFLR	1xDeamidated [N9]	2	2	1	CON_IPI00787323.2; CON_IPI00554648.3	0	1420.73	0.3	Low
	TRUE	Low	RTEMENEFVLIKK	1xOxidation [M4]	2	2	1	CON_IPI00748057.2; CON_IPI00554648.3	2	1652.87	0.29	Low
	TRUE	Low	TKTEISEMNRNISR		1	1	2	CON_IPI00554648.3	2	1678.85	0.29	Low
	TRUE	Low	LSELEAALQRAKQDMAR	1xOxidation [M15]	2	2	1	CON_IPI00787323.2; CON_IPI00554648.3	2	1946.01	0.29	Low
	TRUE	Low	GGLGGGYGGASGMGGITAVTVNQSLLSPLVLEVDPNIQAVRTQEKEQIK	1xDeamidated [Q]	1	1	4	CON_IPI00554648.3	2	4910.56	0.27	Low
[truncated: 17,758 more rows]
