# Supplementary material for: Covalent inhibition of endoplasmic reticulum chaperone GRP78 disconnects the transduction of ER stress signals to inflammation and lipid accumulation in diet-induced obese mice
Source: eLife. 2022 Feb 9;11:e72182. doi: 10.7554/eLife.72182 (PMC8828050; doi:10.7554/eLife.72182)
Supplement: Figure 7—source data 1. [file elife-72182-fig7-data1.xlsx]

## Sheet: Figure 7A
Curve	ka (1/Ms)	kd (1/s)	KD (M)	Rmax (RU)	Conc (M)	tc	Flow (ul/min)	kt (RU/Ms)	RI (RU)	Chi² (RU²)	U-value
	86510	0.001326	1.533e-08	0.001329		176100000				14.2	95
Cycle: 5 2.5 nM					2.5e-09		30	547300000	0.9859
Cycle: 6 5 nM					5e-09		30	547300000	-0.1324
Cycle: 7 10 nM					1e-08		30	547300000	0.08651
Cycle: 8 20 nM					2e-08		30	547300000	1.423
Cycle: 10 80 nM					8e-08		30	547300000	-0.92
Cycle: 11 160 nM					1.6e-07		30	547300000	-2.137
Cycle: 12 320 nM					3.2e-07		30	547300000	6.842
Cycle: 13 320 nM					3.2e-07		30	547300000	6.031
Curve	ka (1/Ms)	kd (1/s)	KD (M)	Rmax (RU)	Conc (M)	tc	Flow (ul/min)	kt (RU/Ms)	RI (RU)	Chi² (RU²)	U-value
	131600	0.001929	1.466e-08	0.005201		99200000				3.73	95
Cycle: 5 2.5 nM					2.5e-09		30	308200000	4.652
Cycle: 6 5 nM					5e-09		30	308200000	0.5848
Cycle: 7 10 nM					1e-08		30	308200000	1.074
Cycle: 8 20 nM					2e-08		30	308200000	0.4884
Cycle: 9 40 nM					4e-08		30	308200000	0.1094
Cycle: 10 80 nM					8e-08		30	308200000	0.2624
Cycle: 11 160 nM					1.6e-07		30	308200000	-4.327
Cycle: 12 320 nM					3.2e-07		30	308200000	1.453
Cycle: 13 320 nM					3.2e-07		30	308200000	1.213
Curve	ka (1/Ms)	kd (1/s)	KD (M)	Rmax (RU)	Conc (M)	tc	Flow (ul/min)	kt (RU/Ms)	RI (RU)	Chi² (RU²)	U-value
	3536	5.433e-05	1.537e-08	9.65		334800000				18.5	95
Cycle: 3 2.5 nM					2.5e-09		30	1040000000	1.399
Cycle: 5 10 nM					1e-08		30	1040000000	0.6901
Cycle: 6 20 nM					2e-08		30	1040000000	1.109
Cycle: 7 40 nM					4e-08		30	1040000000	1.362
Cycle: 8 80 nM					8e-08		30	1040000000	1.206
Cycle: 9 160 nM					1.6e-07		30	1040000000	1.371
Cycle: 10 320 nM					3.2e-07		30	1040000000	1.145
Cycle: 11 320 nM					3.2e-07		30	1040000000	0.9367
Curve	ka (1/Ms)	kd (1/s)	KD (M)	Rmax (RU)	Conc (M)	tc	Flow (ul/min)	kt (RU/Ms)	RI (RU)	Chi² (RU²)	U-value
	152200	0.003416	2.244e-08	0.08682		100300000				230	95
Cycle: 3 75 nM					7.5e-08		30	311600000	3.231
Cycle: 4 150 nM					1.5e-07		30	311600000	12
Cycle: 5 300 nM					3e-07		30	311600000	28.08
Cycle: 6 600 nM					6e-07		30	311600000	31.52
Cycle: 7 600 nM					6e-07		30	311600000	41.58
Curve	ka (1/Ms)	kd (1/s)	KD (M)	Rmax (RU)	Conc (M)	tc	Flow (ul/min)	kt (RU/Ms)	RI (RU)	Chi² (RU²)	U-value
	155900	0.003257	2.089e-08	0.04118		100600000				857	95
Cycle: 3 100 nM					1e-07		30	312600000	9.029
Cycle: 4 300 nM					3e-07		30	312600000	25.33
Cycle: 5 600 nM					6e-07		30	312600000	30.77
Cycle: 7 900 nM					9e-07		30	312600000	26.41

## Sheet: Figure 7B
Curve	ka (1/Ms)	kd (1/s)	KD (M)	Rmax (RU)	Conc (M)	tc	Flow (ul/min)	kt (RU/Ms)	RI (RU)	Chi² (RU²)	U-value
	699000	0.7753	1.109e-06	69.79		8887000				6.72	95
Cycle: 5 2.5 nM					2.5e-09		30	27610000	-0.2146
Cycle: 6 5 nM					5e-09		30	27610000	-0.8154
Cycle: 7 10 nM					1e-08		30	27610000	-1.337
Cycle: 8 20 nM					2e-08		30	27610000	-1.994
Cycle: 9 40 nM					4e-08		30	27610000	-2.704
Cycle: 10 80 nM					8e-08		30	27610000	-4.966
Cycle: 11 160 nM					1.6e-07		30	27610000	-8.754
Cycle: 12 320 nM					3.2e-07		30	27610000	-15.58
Cycle: 13 320 nM					3.2e-07		30	27610000	-15.68
Curve	ka (1/Ms)	kd (1/s)	KD (M)	Rmax (RU)	Conc (M)	tc	Flow (ul/min)	kt (RU/Ms)	RI (RU)	Chi² (RU²)	U-value
	121300	0.2337	1.926e-06	108.7		3139000000				21200	95
Cycle: 7 1.56 µM					1.56e-06		30	9755000000	-57.69
Cycle: 8 3.25 µM					3.25e-06		30	9755000000	-71.81
Cycle: 9 6.25 µM					6.25e-06		30	9755000000	-85.08
Cycle: 10 12.5 µM					1.25e-05		30	9755000000	-95.05
Cycle: 11 25 µM					2.5e-05		30	9755000000	-134.9
Cycle: 12 50 µM					5e-05		30	9755000000	-241.1
Cycle: 13 100 µM					0.0001		30	9755000000	-529.5
Curve	ka (1/Ms)	kd (1/s)	KD (M)	Rmax (RU)	Conc (M)	tc	Flow (ul/min)	kt (RU/Ms)	RI (RU)	Chi² (RU²)	U-value
	302.1	0.3079	1.99e-06	33920		19100000000000				12600	20
Cycle: 5 1.56 µM					1.56e-06		30	59360000000000	-49.81
Cycle: 6 3.25 µM					3.25e-06		30	59360000000000	-103.8
Cycle: 7 6.25 µM					6.25e-06		30	59360000000000	-200.3
Cycle: 8 12.5 µM					1.25e-05		30	59360000000000	-404.9
Cycle: 9 25 µM					2.5e-05		30	59360000000000	-836.9
Cycle: 10 50 µM					5e-05		30	59360000000000	-1697
Cycle: 11 100 µM					0.0001		30	59360000000000	-3403
Curve	ka (1/Ms)	kd (1/s)	KD (M)	Rmax (RU)	Conc (M)	tc	Flow (ul/min)	kt (RU/Ms)	RI (RU)	Chi² (RU²)	U-value
	80.88	0.3152	3.89e-06	133900		2179000000				14300	15
Cycle: 5 1.56 µM					1.56e-06		30	6769000000	-37.71
Cycle: 6 3.125 µM					3.125e-06		30	6769000000	-91.86
Cycle: 7 6.25 µM					6.25e-06		30	6769000000	-206.9
Cycle: 8 12.5 µM					1.25e-05		30	6769000000	-442.4
Cycle: 9 25 µM					2.5e-05		30	6769000000	-914.4
Cycle: 10 50 µM					5e-05		30	6769000000	-1854
Cycle: 11 100 µM					0.0001		30	6769000000	-3725
