# Supplementary material for: Covalent inhibition of endoplasmic reticulum chaperone GRP78 disconnects the transduction of ER stress signals to inflammation and lipid accumulation in diet-induced obese mice
Source: eLife. 2022 Feb 9;11:e72182. doi: 10.7554/eLife.72182 (PMC8828050; doi:10.7554/eLife.72182)
Supplement: Figure 9—source data 1. [file elife-72182-fig9-data1.xlsx]

## Sheet: Figure 1B
Time (day)	STD							HFD									HFD+celastrol									HFD+Analogue
1	35.67	30.1	33.8	36.99	33.47	31.36		52.72	51.15	48.72	57.75	51.59	51.84	52.66	52.94		49	43.3	51.87	52.42	55.09	48.12	46.85	45.8		51.96	54.1	49.37	45.78	48.74	49.23	55.02	60.77
2	35.57	29.98	32.86	35.81	33.45	31.21		50	52.12	48.61	56.46	50.97	52.05	52.89	50.66		46.9	41.27	50.1	48.88	52.09	45.68	44.84	43.5		52.2	54.46	47.42	44.53	47.39	49.08	54.6	60.05
3	35.58	29.83	32.89	35.76	33.48	31.11		49.98	51.99	47.8	56.74	50.64	52.16	52.02	50.08		45.1	40.14	48.2	47.14	50.8	44.32	43.61	41.79		51.31	54.48	45.79	44.59	46.7	48.7	54.22	59
4	35.29	32.96	30.83	35.33	33.55	30.84		50.51	52.06	48.08	56.16	50.75	51.42	51.26	49.81		43.67	38.4	45.87	45.6	48.64	42.59	43.39	39.5		50.58	52.83	43.82	44.31	45.93	48.7	54.36	59.12
5	35.15	30.76	33	35.3	30.19	32.24		50.52	51.1	47.96	56.36	49.89	51.63	51.97	49.68		42.54	37.49	45.06	44.39	41.6	41.1	41.7	38.62		50.8	52.21	43.57	44.19	45.77	48	54.34	58.59
6	34.83	30.47	32.03	34.97	33.83	30.32		51.07	49.71	46.52	56.8	49.15	51.15	50.43	49.49		40.87	36.15	43.37	42.68	39.8	39.52	39.13	37		50.97	52.25	42.48	44.36	45.71	47.8	53.79	59.4
7	34.18	30.36	31.92	33.91	33.87	30.33		51.79	48.75	47.06	56.39	49.05	51.13	51.05	49.61		38.69	34.78	41.56	40.87	38.5	38.41	39.25	36.11		50.85	53.06	45.21	44.41	45.52	46.83	53.58	60.77
8	34.5	30.71	32.13	33.03	33.14	29.95		52.22	49.35	46.07	57.09	48.87	51.18	51.94	49.6		37.43	33.43	40.37	39.88	37.5	38.34	38.59	34.52		51.54	53.68	45.92	45.41	45.63	46.56	54.01	60.25
9	34.36	31.15	31.82	33.89	33.41	30.72		52.12	49.54	45.74	57.54	49.35	50.95	51.75	49.86		35.6	32.2	39.1	38.53	37.7	33.3	37.8	34.2		51.6	52.61	46.68	45.09	46.1	46.16	54.01	60.11
10	33.9	32.42	31.05	33.35	33.56	30.46		51.51	50.3	46.11	56.87	48.98	50.45	52.15	50.28		36.01	32.19	36.53	34.4	31.52	37.57	36.5	32.9		52.6	52.84	46.37	45.3	46.46	45.66	52.93	59.77
11	34.1	30.9	32.6	32.84	33.28	30.48		52	50	46.2	56.4	48.9	50.8	52.2	49.9		33.7	30.31	35.24	35.3	34.99	30.81	35.2	31.6		51.9	53.1	46.7	45.3	46.3	45.3	53.3	60.6
12	34.58	31.6	32.84	32.9	32.4	29.8		52.68	49.36	46.38	57.05	49.22	51.06	52.32	49.9		31.96	29.22	34.13	33.62	33.58	29.7	33.8	30.2		52.65	53.12	47.13	45.08	46.46	44.74	53.23	60.04
13	34.48	31.52	32.9	33.79	32.57	29.67		52.76	49.21	47.35	56.83	49.84	50.68	53.18	49.28		29.97	27.52	33.28	32.6	33.49	28.61	32.7	29.1		52.74	52.39	46.76	44.69	46.76	44.61	53.68	60.17
14	34.68	31.79	33.71	33.85	32.67	29.8		52.16	49.37	47.34	56.46	50.21	50.75	53.05	49.82		29.05	26.66	32.13	31.97	32.68	28.46	31.9	28.3		52.64	53.28	47.44	45.54	47.12	45.01	54.36	60.25
15	35.02	31.56	33.56	33.52	32.73	30.42		52.18	50.01	47.98	56.32	50.25	50.67	52.89	50.45		27.8	25.4	30.99	31.9	32.1	28.1	31.09	29.1		53.04	53.53	47.4	44.16	47.04	47.04	54.96	59.96
16	35.32	31.31	33.49	33.48	33.54	30.26		52.24	50.45	48.11	56.94	50.65	50.69	52.65	50.3		26.5	24.05	29.76	31.89	31.81	27.67	30.94	28.15		54.21	53.47	47.6	46.06	47.34	44.66	55.3	60.78
17	34.75	31.02	32.94	33.9	33.34	30.38		52.08	50.56	47.78	56.38	50.42	51.37	52.2	50.1		26.85	23.91	30.01	32.71	31.51	30.04	30.82	28.17		53.85	52.23	46.92	46.72	47.27	44.65	54.8	60.34
18	35.3	31.85	33.25	33.67	33.45	30.3		52.05	50.45	48.02	56.43	50.32	51.4	52.3	50.21		25.28	23.24	28.9	31.32	30.2	30.72	29.67	28.25		53.9	52.32	47.02	47.05	47.32	44.45	54.98	60.32
19	34.1	31.2	33.57	33.79	33.32	30.27		52.01	50.25	48.05	56.58	50.5	51.47	52.43	50.3		26.1	25.3	28.5	33.2	30.24	30.67	29.24	29		53.76	52.2	47.48	47.31	47.44	44.32	54.95	59.87
20	34.22	31.18	33.77	33.72	33.3	30.17		51.67	50.21	47.87	56.31	51.13	51.09	53.18	50.42		26.15	26.99	27.5	33.34	30.04	30.27	29.01	29.79		53.47	51.71	47.22	46.61	47.47	43.82	55.63	61.13
21	34.23	32	33.52	33.67	33.28	30.2		51.87	50.5	48	57.2	51.34	51.2	53.05	50.45		26.16	26.97	28.9	33.28	31.28	30.35	29.15	29.78		53.62	51.72	47.87	47.64	48.05	44.28	55.78	61.32

## Sheet: Figure 1C
	STD							HFD							HFD+celastrol							HFD+Analogue
Fat Mass (% Body Weight)	19.6	19.8	17.7	19.7	20.8	16.6		31.1	32.9	32.3	30.3	32.4	35		18.8	20.4	24.3	18.9	17.7	19.8		32	35	31.2	35.5	35.1	33.8	34.7

## Sheet: Figure 1D
	STD							HFD								HFD+celastrol							HFD+Analogue
Lean Mass (% Body Weight)	46.1	46.5	48.2	47.6	46.2	48.4		33.8	35.1	37.8	34.3	35.2	37.7	32.8		47.7	44.5	41.4	47.9	48.1	45		35.2	32.5	36	32.4	32.4	33.5	30.3	32.3

## Sheet: Figure 1E
	Time (min)	STD							HFD								HFD+celastrol						HFD+analogue
	0	7.1	6.4	5.6	8.3	8.1	7.8		6.5	8.1	6.3	4.7	8	4.9	10.8		3.2	3.1	1.8	3.9	4.8		6.4	6.3	5.6	5.9	6.1	6	8.1	6.9
	15	11.4	10.2	10.8	12.3	11.1	9.8		13.4	12.5	12.5	12.3	12.7	14.9	15.1		7.6	7.2	8.3	6.8	8.1		11.3	11	13.7	12.6	12.5	13	15.9	14.3
	30	12.9	9.7	9.5	10.2	11.6	11.1		15.9	15.7	14.6	16.4	14.6	15.4	16.8		5.8	6.6	6.9	7.6	5.8		13.8	15.7	14.4	15.4	14.2	13.8	16.7	15.9
	60	9.1	10.3	8.6	8.1	8.6	7.2		13.2	12.8	12.9	13.7	12.8	11.3	13.4		5.3	5.3	5.2	6.8	6.5		11.2	11.7	12.9	12.4	12.2	10.7	12.2	14.7
	90	9.7	8	8.7	7.6	7.2	6.5		9.7	9.9	10.4	12	9.4	9.7	10.3		3.4	5.3	4.4	4.8	6.3		11.7	10.6	11.3	12.3	10.2	9.9	10.3	10.1
	120	9.2	5	8	6.8	6.3	6.3		9.4	9.4	9.4	11.1	8.1	7.7	10.8		4.3	4.1	6.2	4.2	5.8		8.5	10.3	10.4	9.4	9.4	9.3	11.5	8.6
	Mean	SD	N
AUC of GTT	1064	46.57	6	STD
	1418	40	7	HFD
	680	35.84	5	HFD+celastrol
	1438	43.33	8	HFD+analogue

## Sheet: Figure 1F
	Time (min)	STD							HFD									HFD+celastrol						HFD+analogue
	0	8.3	7.1	8.7	7.3	8.5	6.7		11.4	10.6	11.5	12.3	10.6	12.4	12.1	12.2		6.1	7.4	5.4	6.8	6.1		11.3	10.5	11.1	12.6	11.5	12.3	10.9	11.7
	15	6.8	5.8	7.5	6.6	7.7	6.2		9.9	10	9.8	10.2	10.1	10.6	11.5	11.2		4.8	5.6	7.2	4.6	5.4		9.4	9.2	9	10.6	9	10.5	10.6	10.9
	30	6.4	6.2	8.1	8.7	7.7	7.1		10.4	11.1	10.6	10.5	10.5	10.2	8.7	8.9		5.4	7.5	7	5.4	6.4		9	9.2	9.5	10	10.3	10	10.3	11.8
	60	8.4	6.7	7.2	6.2	6.4	6.4		9.7	9.3	8.8	9.4	8.5	8.7	8.5	9.2		5.6	6.7	5.2	4.8	6.3		7.4	7.9	10.1	8.7	8.7	8.7	8.3	8.9
	90	5.1	7.6	6.3	6.3	6.4	6.8		7.7	8.8	6.7	8.8	9.4	7.6	9.2	7.6		5.1	7.2	5.3	5.2	6.5		6.7	8.2	6.7	9	8.1	7.8	8.8	9.3
	120	5.5	5.9	6.5	6.8	7.2	6.2		6.8	9.4	4.9	7.2	8.4	7.1	7.2	6.4		5.7	6.4	6	5.1	6.9		7.4	7.3	7.1	7	6.7	6.7	6.7	7.1
AUC of GTT	Mean	SD	N
	819.8	32.49	6	STD
	1096	34.31	8	HFD
	710	34	5	HFD+celastrol
	1065	32.41	8	HFD+analogue
